# Supplementary material
Source: publisher figshare collection journal article supplement (https://gsajournals.figshare.com/ndownloader/files/13593923)
Supplement: Supplementary file 1 [file 13593923]

## Sheet: Table S1
Table S1. List of accessions used in current study with their genetic background
No	Pedigree	Background
SD1	MAYOOR//TKSN1081/AE.SQUARROSA(222)/3/OPATA/6/68.111/RGB-U//WARD/3/FGO/4/RABI/5/AE.SQUARROSA(878)	SYN-DER
SD2	MAYOOR//TKSN1081/AE.SQUARROSA(222)/3/OPATA/6/68.111/RGB-U//WARD/3/FGO/4/RABI/5/AE.SQUARROSA(878)	SYN-DER
SD3	68.111/RGB-U//WARD/3/FGO/4/RABI/5/AE.SQUARROSA (878)/6/CETA/5/68.111/RGB-U//WARD RESEL/3/STIL/4/AE.SQUARROSA(783)	SYN-DER
SD4	MAYOOR//TKSN1081/AE.SQUARROSA(222)/3/OPATA/4/ CETA/AE.SQUARROSA(895)	SYN-DER
SD5	TURACO/5/CHIR3/4/SIREN//ALTAR 84/AE.SQUARROSA(205)/3/3*BUC/6/FCT/6/DOY1/AE.SQUARROSA(458)	SYN-DER
SD6	OPATA//CETA/AE.SQUARROSA(895)	SYN-DER
SD7	68.111/RGB-U//WARD/3/FGO/4/RABI/5/AE.SQUARROSA (878)/6/CETA/6/CETA/AE.SQUARROSA(895)	SYN-DER
SD8	OPATA//DOY1/AE.SQUARROSA(372)	SYN-DER
SD9	CHAPIO/INQALAB 91/6/68.111/RGB-U//WARD/3/FGO/4/RABI/5/AE.SQUARROSA (878)	SYN-DER
SD10	D67.2/P66.270//AE.SQUARROSA(223)3/ARLIN_1/T.MONOCOCCUM(95)	SYN-DER
SD11	TURACO/5/CHIR3/4/SIREN//ALTAR84/AE.SQUARROSA(205)/3/3*BUC/6/CNO/7/ CROC_1/AE.SQUARROSA(444)	SYN-DER
SD12	MAYOOR//TKSN1081/AE.SQUARROSA(222)/3/OPATA/4/ DOY1/AE.SQUARROSA(372)	SYN-DER
SD13	MAYOOR//TKSN1081/AE.SQUARROSA(222)/3/OPATA/6/68.111/RGB-U//WARD/3/FGO/4/RABI/5/AE.SQUARROSA(878)	SYN-DER
SD14	D67.2/P66.270//AE.SQUARROSA(223)/3/ARLIN_1/T.MONOCOCCUM(95)	SYN-DER
SD15	URES/PRL//BAV92/3/YAV_2/TEZ//AE.SQUARROSA(249)	SYN-DER
SD16	GAN/AE.SQUARROSA (897)//OPATA/3/D67.2/P66.270//AE.SQUARROSA(223)	SYN-DER
SD17	OPATA//CETA/AE.SQUARROSA(1031)	SYN-DER
SD18	OPATA//DOY 1/AE.SQUARROSA(255)	SYN-DER
SD20	OPATA//CETA/AE.SQUARROSA(1031)	SYN-DER
SD21	OPATA//ROK/KML// AE.SQUARROSA(214)	SYN-DER
SD22	OPATA//DOY 1/AE.SQUARROSA(517)	SYN-DER
SD23	OPATA//DOY 1/AE.SQUARROSA(517)	SYN-DER
SD24	OPATA//ALTAR 84.AE.SQUARROSA(J BANGOR)	SYN-DER
SD25	OPATA//68.111/RGB-U//WARD/3/FGO/4/RABI/5/AE.SQUARROSA(878)	SYN-DER
SD26	OPATA//68.111/RGB-U//WARD/3/FGO/4/RABI/5/AE.SQUARROSA(878)	SYN-DER
SD27	OPATA//AE.SQUARROSA(1026)/DOY 1)	SYN-DER
SD28	OPATA//68.112/WARD//AE.SQUARROSA(369)	SYN-DER
SD29	OPATA//68.111/RGB-U//WARD RESEL/3/STIL/4/AE.SQUARROSA(783)	SYN-DER
SD30	GANAE.SQUARROSA(236)//CETA/AE.SQUARROSA(895)/3/MAIZ/4/INQALAB91/5/ BKH-94	SYN-DER
SD31	BKH-93/6/CPI/GEDIZ/3/GOO//JO69/CRA/4/AE.SQUARROSA(208)/5/OAPTA	SYN-DER
SD32	PBW-343/6/YAV_3/SCO//JO69/CRA/3/YAV79/4/AE.SQUARROSA (498)/5/OPATA	SYN-DER
SD33	CHIR3/CBRD//OPATA	Bread wheat
SD34	SAAR/INQALAB 91/4/MAYOOR//TK SN1081/AE.SQUARROSA(222)/3/CBRD	SYN-DER
SD35	SAAR/INQALAB 91/4/MAYOOR//TK SN1081/AE.SQUARROSA(222)/3/CBRD	SYN-DER
SD36	SAAR/INQALAB 91/4/MAYOOR//TK SN1081/AE.SQUARROSA(222)/3/CBRD	SYN-DER
SD37	MAYOOR//TK SN1081/AE.SQUARROSA(222)/3/PASTOR/4/SARSABZ	SYN-DER
SD38	MAYOOR//TK SN1081/AE.SQUARROSA(222)/3/CBRD/4/KAMBARA	SYN-DER
SD39	PBW-343/6/YAV_3/SCO//JO69/CRA/3/YAV79/4/AE.SQUARROSA(498)/5/OPATA	SYN-DER
SD40	CHIR3/CBRD/3/GAN/AE.SQUARROSA (897)//OPATA	SYN-DER
SD41	MAYOOR//TK SN1081/AE.SQUARROSA (222)/4/SABUF/3/BCN//CETA/AE.SQUARROSA(895)/5/GAN/AE.SQUARROSA (897)//OPATA	SYN-DER
SD42	KAUZ/3/MAYOOR//TK SN1081/AE.SQUARROSA(222)/3/CBRD	SYN-DER
SD43	BKH-93/BORLOUG M95	Bread wheat
SD44	BKH-93/BORLOUG M95	Bread wheat
SD45	FUS/BW-595-(ALTAR 84/AE.SQUARROSA (224)//2*YACO/7/OPATA/6/68.111RGB-U//WARD/3/FGO/4/…) x INQ-120-(162 SAAR/INQALAB 91)	SYN-DER
SD46	FUS/BW-586-(ALTAR 84/AE.SQUARROSA (224)//2*YACO/3/MAYOOR//TK SN1081/AE.SQUARROSA (222)/4/KUKUN) x SH/BW.R.KB-1-(ALTAR 84/AE.SQUARROSA (221)//YACO)	SYN-DER
SD47	SARSABZ//CHIR3/CBRD	Bread wheat
SD48	OPATA/PASTOR	Bread wheat
SD49	PBW-343*2/CHAPIO/3/D67.2/P66.270//T.BOEOTICUM(66)	SYN-DER
SD50	PBW-343*2/CHAPIO/3/D67.2/P66.270//T.BOEOTICUM(66)	SYN-DER
SD51	OPATA/5/68.111/RGB-U//WARD RESEL/3/STIL/4/AE.SQUARROSA(1038)	SYN-DER
SD52	ALTAR 84/AE.SQUARROSA(224)//2*YACO/3/MAYOOR/TK SN1081/AE.SQUARROSA(222)/4/KUKUN/5/GAN/AE.SQUARROSA(248)	SYN-DER
SD53	ALTAR 84/AE.SQUARROSA(224)//2*YACO/3/MAYOOR/TK SN1081/AE.SQUARROSA(222)/4/KUKUN/5/GAN/AE.SQUARROSA(248)	SYN-DER
SD54	ALTAR 84/AE.SQUARROSA (224)//2*YACO/3/MAYOOR/TK SN1081/AE.SQUARROSA(222)/4/KUKUN/5/GAN/AE.SQUARROSA(248)	SYN-DER
SD55	ALTAR 84/AE.SQUARROSA(224)//2*YACO/3/MAYOOR/TK SN1081/AE.SQUARROSA(222)/4/KUKUN/5/GAN/AE.SQUARROSA(248)	SYN-DER
SD56	ALTAR 84/AE.SQUARROSA(224)//2*YACO/3/MAYOOR/TK SN1081/AE.SQUARROSA(222)/4/KUKUN/5/GAN/AE.SQUARROSA(248)	SYN-DER
SD57	ALTAR 84/AE.SQUARROSA(224)//2*YACO/3/MAYOOR/TK SN1081/AE.SQUARROSA(222)/4/KUKUN/5/GAN/AE.SQUARROSA)(248)	SYN-DER
SD58	ALTAR 84/AE.SQUARROSA(224)//2*YACO/3/MAYOOR/TK SN1081/AE.SQUARROSA(222)/4/KUKUN/5/GAN/AE.SQUARROSA(248)	SYN-DER
SD59	ALTAR 84/AE.SQUARROSA(224)//2*YACO/3/MAYOOR/TK SN1081/AE.SQUARROSA(222)/4/KUKUN/5/GAN/AE.SQUARROSA(248)	SYN-DER
SD60	MH 97/2/D67.2/P66.270//T.BOEOTICUM(66)	SYN-DER
SD61	TURACO/5/CHIR3/4/SIREN//ALTAR84/AE.SQUARROSA(205)/3/3*BUC/6/CNO/7/ CPI/GEDIZ/3/GOO//JO/CRA/4/AE.SQUARROSA(227)	SYN-DER
SD62	TURACO/5/CHIR3/4/SIREN//ALTAR84/AE.SQUARROSA(205)/3/3*BUC/6/CNO/7/ CPI/GEDIZ/3/GOO//JO/CRA/4/AE.SQUARROSA(227)	SYN-DER
SD63	TURACO/5/CHIR3/4/SIREN//ALTAR84/AE.SQUARROSA(205)/3/3*BUC/6/CNO/7/ CPI/GEDIZ/3/GOO//JO/CRA/4/AE.SQUARROSA(227)	SYN-DER
SD64	RABE/2*MO88/5/68.111/RGB-U//WARD RESEL/3/STIL/4/AE.SQUARROSA(1038)	SYN-DER
SD65	RABE/2*MO88/5/68.111/RGB-U//WARD RESEL/3/STIL/4/AE.SQUARROSA(1038)	SYN-DER
SD66	RABE/2*MO88/5/68.111/RGB-U//WARD RESEL/3/STIL/4/AE.SQUARROSA(1038)	SYN-DER
SD67	MAYOOR//TKSN1081/AE.SQUARROSA(222)/3/OPATA/6/68.111/RGB-U//WARD/3/FGO/4/RABI/5/AE.SQUARROSA(878)	SYN-DER
SD68	CPI/GEDIZ/3/GOO//JO69/CRA/4/AE.SQUARROSA(208)/5/OAPTA/6/68.111/RGB-U//WARD/3/FGO/4/RABI/5/AE.SQUARROSA(878)	SYN-DER
SD69	MAYOOR//TKSN1081/AE.SQUARROSA(222)/3/OPATA/6/68.111/RGB-U//WARD/3/FGO/4/RABI/5/AE.SQUARROSA(878)	SYN-DER
SD70	CPI/GEDIZ/3/GOO//JO69/CRA/4/AE.SQUARROSA (208)/5/OAPTA/6/68.111/RGB-U//WARD RESEL/3/STIL/4/AE.SQUARROSA(783)	SYN-DER
SD71	CPI/GEDIZ/3/GOO//JO69/CRA/4/AE.SQUARROSA(208)/5/OAPTA/6/68.111/RGB-U//WARD RESEL/3/STIL/4/AE.SQUARROSA(783)	SYN-DER
SD72	CPI/GEDIZ/3/GOO//JO69/CRA/4/AE.SQUARROSA(208)/5/OAPTA/6/68.111/RGB-U//WARD RESEL/3/STIL/4/AE.SQUARROSA(783)	SYN-DER
SD73	CPI/GEDIZ/3/GOO//JO69/CRA/4/AE.SQUARROSA(208)/5/OAPTA/6/68.111/RGB-U//WARD RESEL/3/STIL/4/AE.SQUARROSA(783)	SYN-DER
SD74	CPI/GEDIZ/3/GOO//JO69/CRA/4/AE.SQUARROSA(208)/5/OAPTA/6/68.111/RGB-U//WARD RESEL/3/STIL/4/AE.SQUARROSA(783)	SYN-DER
SD75	CPI/GEDIZ/3/GOO//JO69/CRA/4/AE.SQUARROSA(208)/5/OPATA/6/68.111/RGB-U//WARD RESEL/3/STIL/4/AE.SQUARROSA(783)	SYN-DER
SD76	CPI/GEDIZ/3/GOO//JO69/CRA/4/AE.SQUARROSA(208)/5/OPATA/6/68.111/RGB-U//WARD RESEL/3/STIL/4/AE.SQUARROSA(783)	SYN-DER
SD77	CPI/GEDIZ/3/GOO//JO69/CRA/4/AE.SQUARROSA(208)/5/OPATA/6/68.111/RGB-U//WARD RESEL/3/STIL/4/AE.SQUARROSA(783)	SYN-DER
SD78	CPI/GEDIZ/3/GOO//JO69/CRA/4/AE.SQUARROSA(208)/5/OPATA/6/68.111/RGB-U//WARD RESEL/3/STIL/4/AE.SQUARROSA(783)	SYN-DER
SD79	CPI/GEDIZ/3/GOO//JO69/CRA/4/AE.SQUARROSA(208)/5/OPATA/6/68.111/RGB-U//WARD RESEL/3/STIL/4/AE.SQUARROSA(783)	SYN-DER
SD80	CPI/GEDIZ/3/GOO//JO69/CRA/4/AE.SQUARROSA(208)/5/OPATA/6/68.111/RGB-U//WARD RESEL/3/STIL/4/AE.SQUARROSA(783)	SYN-DER
SD81	CPI/GEDIZ/3/GOO//JO69/CRA/4/AE.SQUARROSA(208)/5/OPATA/6/68.111/RGB-U//WARD RESEL/3/STIL/4/AE.SQUARROSA(783)	SYN-DER
SD82	CPI/GEDIZ/3/GOO//JO69/CRA/4/AE.SQUARROSA(208)/5/OPATA/6/68.111/RGB-U//WARD RESEL/3/STIL/4/AE.SQUARROSA(783)	SYN-DER
SD83	CPI/GEDIZ/3/GOO//JO69/CRA/4/AE.SQUARROSA(208)/5/OPATA/6/68.111/RGB-U//WARD RESEL/3/STIL/4/AE.SQUARROSA(783)	SYN-DER
SD84	CPI/GEDIZ/3/GOO//JO69/CRA/4/AE.SQUARROSA (208)/5/OPATA/6/68.111/RGB-U//WARD RESEL/3/STIL/4/AE.SQUARROSA(783)	SYN-DER
SD85	TURACO/5/CHIR3/4/SIREN//ALTAR84/AE.SQUARROSA(205)/3/3*BUC/6/CNO/7/ CPI/GEDIZ/3/GOO//JO/CRA/4/AE.SQUARROSA(273)	SYN-DER
SD86	OPATA/6/68.111/RGB-U//WARD/3/FGO/4/RABI/5/AE.SQUARROSA(878)	SYN-DER
SD87	INQALAB 91/TSAPKI//SCA/AE.SQUARROSA(518)	SYN-DER
SD88	ALTAR 84/AE.SQUARROSA(221)//YACO/3/INQALAB 91/4/D67.2/P66.270//T.BOEOTICUM(66)	SYN-DER
SD89	CNDO/R143//ENTE/MEXI_2/3/AE.SQUARROSA(TAUS)/4/WEAVER/5/2*KAUZ/6/ DOY1/AE.SQUARROSA) (458)	SYN-DER
SD90	CNDO/R143//ENTE/MEXI_2/3/AE.SQUARROSA(TAUS)/4/WEAVER/5/2*KAUZ/6/ DOY1/AE.SQUARROSA) (458)	SYN-DER
SD91	CNDO/R143//ENTE/MEXI_2/3/AE.SQUARROSA(TAUS)/4/WEAVER/5/2*KAUZ/6/ DOY1/AE.SQUARROSA) (458)	SYN-DER
SD92	CNDO/R143//ENTE/MEXI_2/3/AE.SQUARROSA(TAUS)/4/WEAVER/5/2*KAUZ/6/ DOY1/AE.SQUARROSA) (458)	SYN-DER
SD93	CNDO/R143//ENTE/MEXI_2/3/AE.SQUARROSA(TAUS)/4/WEAVER/5/2*KAUZ/6/DOY1/AE.SQUARROSA(458)	SYN-DER
SD94	SERI/5/68.111/RGB-U//WARD RESEL/3/STIL/4/AE.SQUARROSA(392)	SYN-DER
SD95	TURACO/5/CHIR3/4/SIREN//ALTAR84/AE.SQUARROSA(205)/3/3*BUC/6/OPATA/7/ SCA/AE.SQUARROSA(518)	SYN-DER
SD96	MAYOOR//TK SN1081/AE.SQUARROSA(222)/3/CBRD/4/ARLIN_1/T.MONOCOCCUM(95)	SYN-DER
SD97	MAYOOR//TK SN1081/AE.SQUARROSA(222)/3/CBRD/4/ARLIN_1/T.MONOCOCCUM(95)	SYN-DER
SD98	CHAPIO/INQALAB 91/4/68.111/RGB-U//WARD/3/AE.SQUARROSA(452)	SYN-DER
SD99	CHAPIO/INQALAB 91/4/68.111/RGB-U//WARD/3/AE.SQUARROSA(452)	SYN-DER
SD100	CROC-1/AE.SQUARROSA(224)//KAUZ/3/CETA/AE.SQUARROSA(895)	SYN-DER
SD101	CROC-1/AE.SQUARROSA(224)//KAUZ/3/CETA/AE.SQUARROSA(895)	SYN-DER
SD102	OPATA/PAS//DOY1/AE.SQUARROSA(1024)	SYN-DER
SD103	MAYOOR//TKSN1081/AE.SQUARROSA(222)/3/OPATA/4/ DOY1/AE.SQUARROSA(515)	SYN-DER
SD104	DOYI/AE.SQUARROSA(1018)/6/CPI/GEDIZ/3/GOO//JO69/CRA/4/AE.SQUARROSA (208)/5/OPATA	SYN-DER
SD105	DOYI/AE.SQUARROSA(1018) x CPI/GEDIZ/3/GOO//JO69/CRA/4/AE.SQUARROSA (208)/5/OPATA	SYN-DER
SD106	DOYI/AE.SQUARROSA(1018) x CPI/GEDIZ/3/GOO//JO69/CRA/4/AE.SQUARROSA (208)/5/OPATA	SYN-DER
SD107	MAYOOR/TK SN1081/AE.SQUARROSA (222)/3/PASTOR/4/CROC_1/AE.SQUARROSA(444)	SYN-DER
SD108	MAYOOR/TK SN1081/AE.SQUARROSA(222)/3/PASTOR/4/CROC_1/AE.SQUARROSA(444)	SYN-DER
SD109	PBW-343//DOY1/AE.SQUARROSA(188)	SYN-DER
SD110	OPATA//CETA/AE.SQUARROSA(895)	SYN-DER
SD111	OPATA//INQALAB 91/AC8528	Bread wheat
SD112	OPATA//INQALAB 91/AC8528	Bread wheat
SD113	OPATA//GAN/AE.SQUARROSA(408)	SYN-DER
SD114	OPATA//DOY1/AE.SQUARROSA(458)	SYN-DER
SD115	OPATA//DVERD_2/AE.SQUARROSA(333)	SYN-DER
SD116	OPATA//DVERD_2/AE.SQUARROSA(333)	SYN-DER
SD117	OPATA//DVERD_2/AE.SQUARROSA(333)	SYN-DER
SD118	OPATA//DVERD_2/AE.SQUARROSA(333)	SYN-DER
SD119	OPATA/6/68.111/RGB-U//WARD/3/FGO/4/RABI/5/AE.SQUARROSA(629)	SYN-DER
SD120	OPATA/6/x 68.111/RGB-U//WARD/3/FGO/4/RABI/5/AE.SQUARROSA(629)	SYN-DER
SD121	OPATA//ALTAR 84/AE.SQUARROSA(J BANGOR)	SYN-DER
SD122	OPATA//ALTAR 84/AE.SQUARROSA(J BANGOR)	SYN-DER
SD123	OPATA//ALTAR 84/AE.SQUARROSA(J BANGOR)	SYN-DER
SD124	OPATA//ALTAR 84/AE.SQUARROSA(J BANGOR)	SYN-DER
SD125	OPATA//ALTAR 84/AE.SQUARROSA(J BANGOR)	SYN-DER
SD126	OPATA//CETA/AE.SQUARROSA(1027)	SYN-DER
SD127	OPATA//ALTAR 84/AE.SQUARROSA(205)	SYN-DER
SD128	OPATA//INQALAB 91/TSAPKI	Bread wheat
SD129	OPATA//DOY 1/AE.SQUARROSA(1026)	SYN-DER
SD130	MAYOOR//TK SN1081/AE.SQUARROSA(222)/3/PASTOR/4/MH-97	SYN-DER
SD131	PAS/4/MAYOOR//TK SN1081/AE.SQUARROSA)(222)/3/FCT	SYN-DER
SD132	PAS/4/MAYOOR//TK SN1081/AE.SQUARROSA)(222)/3/FCT	SYN-DER
SD133	MAYOOR//TK SN1081/AE.SQUARROSA)(222)/3/FCT/6/ YAV_3/SCO//JO69/CRA/3/YAV/79/4/AE.SQUARROSA(498)/5/OPATA	SYN-DER
SD134	MAYOOR//TK SN1081/AE.SQUARROSA(222)/3/FCT /6/YAV_3/SCO//JO69/CRA/3/YAV/79/4/AE.SQUARROSA(498)/5/OPATA	SYN-DER
SD135	KAUZ/4/MAYOOR//TK SN1081/AE.SQUARROSA(222)/3/CBRD	SYN-DER
SD136	KAUZ/4/MAYOOR//TK SN1081/AE.SQUARROSA (222)/3/CBRD	SYN-DER
SD137	MAYOOR//TK SN1081/AE.SQUARROSA(222)/3/PASTOR/4/SARSABZ	SYN-DER
SD138	BKH-93/4/MAYOOR//TK SN1081/AE.SQUARROSA)(222)/3/FCT	SYN-DER
SD139	PASTOR/4/MAYOOR//TK SN1081/AE.SQUARROSA(222)/3/CBRD	SYN-DER
SD140	PASTOR/4/MAYOOR//TK SN1081/AE.SQUARROSA(222)/3/CBRD	SYN-DER
SD141	PASTOR/4/MAYOOR//TK SN1081/AE.SQUARROSA(222)/3/CBRD	SYN-DER
SD142	BKH-93/4/MAYOOR//TK SN1081/AE.SQUARROSA)(222)/3/FCT	SYN-DER
SD143	BAV/4/MAYOOR//TK SN1081/AE.SQUARROSA(222)/3/CBRD	SYN-DER
SD144	BKH-94/4/D67.2//P66.270//AE.SQUARROSA(257)/3/OPATA	SYN-DER
SD145	BKH-94/4/D67.2//P66.270//AE.SQUARROSA(257)/3/OPATA	SYN-DER
SD146	CROC-1/AE.SQUARROSA(205)//BORL95/3/ALTAR84	SYN-DER
SD147	KAMBARA/INQALAB	Bread wheat
SD148	INQALAB/7/68.111/RGB-U//WARD/3/FGO/4/RABI/5/AE.SQUARROSA (878)/6/CETA	SYN-DER
SD149	INQILAB 91/RABI//INQALAB	Bread wheat
SD150	INQALAB/7/68.111/RGB-U//WARD/3/FGO/4/RABI/5/AE.SQUARROSA (878)/6/CETA/	SYN-DER
SD151	CHAPIO/INQALAB 91/4/PICUS/3/KAUZ*2/BOW//KAUZ)	Bread wheat
SD152	CHAPIO/INQALAB 91/4/PICUS/3/KAUZ*2/BOW//KAUZ)	Bread wheat
SD153	CHAPIO/INQALAB 91/4/PICUS/3/KAUZ*2/BOW//KAUZ	Bread wheat
SD154	CHAPIO/INQALAB 91/4/PICUS/3/KAUZ*2/BOW//KAUZ	Bread wheat
SD155	CHAPIO/INQALAB 91/4/PICUS/3/KAUZ*2/BOW//KAUZ	Bread wheat
SD156	CHAPIO/INQALAB 91/4/PICUS/3/KAUZ*2/BOW//KAUZ	Bread wheat
SD157	CHAPIO/INQALAB 91/4/PICUS/3/KAUZ*2/BOW//KAUZ	Bread wheat
SD158	CHAPIO/INQALAB 91/4/PICUS/3/KAUZ*2/BOW//KAUZ	Bread wheat
SD159	CHAPIO/INQALAB 91/4/PICUS/3/KAUZ*2/BOW//KAUZ	Bread wheat
SD160	CHAPIO/INQALAB 91/4/PICUS/3/KAUZ*2/BOW//KAUZ	Bread wheat
SD161	CHAPIO/INQALAB 91/4/PICUS/3/KAUZ*2/BOW//KAUZ	Bread wheat
SD162	CHAPIO/INQALAB 91/4/PICUS/3/KAUZ*2/BOW//KAUZ	Bread wheat
SD163	CHAPIO/INQALAB 91/4/PICUS/3/KAUZ*2/BOW//KAUZ	Bread wheat
SD164	CHAPIO/INQALAB 91/4/PICUS/3/KAUZ*2/BOW//KAUZ	Bread wheat
SD165	MAYOOR//TK SN1081/AE.SQUARROSA)(222)/3/BCN/6/ 68.111/RGB-U//WARD/3/FGO/4/RABI/5/AE.SQUARROSA (878)/6/CETA/	SYN-DER
SD166	TURACO/5/CHIR3/4/SIREN//ALTAR 84/AE.SQUARROSA(205)/3/3*BUC/6/CNO/7/ 68.111/RGB-U//WARD/3/FGO/4/RABI/5/AE.SQUARROSA (878)/6/CETA/	SYN-DER
SD167	TURACO/5/CHIR3/4/SIREN//ALTAR 84/AE.SQUARROSA(205)/3/3*BUC/6/CNO/7/ 68.111/RGB-U//WARD/3/FGO/4/RABI/5/AE.SQUARROSA (878)/6/CETA/	SYN-DER
SD168	TURACO/5/CHIR3/4/SIREN//ALTAR 84/AE.SQUARROSA(205)/3/3*BUC/6/CNO/7/ 68.111/RGB-U//WARD/3/FGO/4/RABI/5/AE.SQUARROSA (878)/6/CETA/	SYN-DER
SD169	TURACO/5/CHIR3/4/SIREN//ALTAR 84/AE.SQUARROSA(205)/3/3*BUC/6/CNO/7/ 68.111/RGB-U//WARD/3/FGO/4/RABI/5/AE.SQUARROSA (878)/6/CETA/	SYN-DER
SD170	MAYOOR//TK SN1081/AE.SQUARROSA)(222)/3/FCT/4/PASTOR	SYN-DER
SD171	MAYOOR//TK SN1081/AE.SQUARROSA)(222)/3/FCT/4/PASTOR	SYN-DER
SD172	MAYOOR//TK SN1081/AE.SQUARROSA)(222)/3/FCT/4/PASTOR	SYN-DER
SD173	MAYOOR//TK SN1081/AE.SQUARROSA)(222)/3/FCT/4/PASTOR	SYN-DER
SD174	MAYOOR//TK SN1081/AE.SQUARROSA)(222)/3/FCT/4/PASTOR	SYN-DER
SD175	MAYOOR//TK SN1081/AE.SQUARROSA)(222)/3/FCT/4/PASTOR	SYN-DER
SD176	MAYOOR//TK SN1081/AE.SQUARROSA)(222)/3/BCN/4//6/68.111/RGB-U//WARD/3/FGO/4/RABI/5/AE.SQUARROSA (878)/6/CETA/	SYN-DER
SD177	GAN/AE.SQUARROSA(236)//CETA/AE.SQUARROSA(895)/3/MAIZ/4/INQALAB 91/5/ PBW-343	SYN-DER
SD178	MAYOOR//TK SN1081/AE.SQUARROSA)(222)/3/FCT/4/PASTOR	SYN-DER
SD179	MAYOOR/PASTOR	Bread wheat
SD180	MAYOOR/PASTOR	Bread wheat
SD181	MAYOOR/PASTOR	Bread wheat
SD182	MAYOOR/PASTOR	Bread wheat
SD183	MAYOOR/PASTOR	Bread wheat
SD184	CHIRYA/PBW-343	Bread wheat
SD185	CHIRYA/PBW-343	Bread wheat
SD186	CHIRYA/PASTOR	Bread wheat
SD187	CHIRYA/Weebill-1	Bread wheat
SD188	CHIRYA/Weebill-1	Bread wheat
SD189	CHIRYA/BKH-94	Bread wheat
SD190	DOY1/AE.SQUARROSA(224)//HANS/PRL	SYN-DER
SD191	ALTAR 84/AE.SQUARROSA(193)//PASTOR	SYN-DER
SD192	GAN/AE.SQUARROSA(236)//CETA/AE.SQUARROSA(895)/3/MAIZ/4/INQALAB 91/5/ BKH-94	SYN-DER
SD193	GAN/AE.SQUARROSA(236)//CETA/AE.SQUARROSA(895)/3/MAIZ/4/INQALAB 91/5/BKH-94	SYN-DER
SD194	GAN/AE.SQUARROSA(236)//CETA/AE.SQUARROSA(895)/3/MAIZ/4/INQALAB 91/5/BKH-94	SYN-DER
SD195	GAN/AE.SQUARROSA(236)//CETA/AE.SQUARROSA(895)/3/MAIZ/4/INQALAB 91/5/BKH-94	SYN-DER
SD196	GAN/AE.SQUARROSA(236)//CETA/AE.SQUARROSA(895)/3/MAIZ/4/INQALAB 91/5/BKH-94	SYN-DER
SD197	GAN/AE.SQUARROSA(236)//CETA/AE.SQUARROSA(895)/3/MAIZ/4/INQALAB 91/5/ PBW-343	SYN-DER
SD198	GAN/AE.SQUARROSA(236)//CETA/AE.SQUARROSA(895)/3/MAIZ/4/INQALAB 91/5/PBW-343	SYN-DER
SD199	GAN/AE.SQUARROSA(236)//CETA/AE.SQUARROSA(895)/3/MAIZ/4/INQALAB 91/5/ PBW-343	SYN-DER
SD200	GAN/AE.SQUARROSA(236)//CETA/AE.SQUARROSA(895)/3/MAIZ/4/INQALAB 91/5/PBW-343	SYN-DER
SD201	GAN/AE.SQUARROSA(236)//CETA/AE.SQUARROSA(895)/3/MAIZ/4/INQALAB 91/5/PBW-343	SYN-DER
SD202	GAN/AE.SQUARROSA(236)//CETA/AE.SQUARROSA(895)/3/MAIZ/4/INQALAB 91/5/PBW-343	SYN-DER
SD203	GAN/AE.SQUARROSA(236)//CETA/AE.SQUARROSA(895)/3/MAIZ/4/INQALAB 91/5/PBW-343	SYN-DER
SD204	GAN/AE.SQUARROSA(236)//CETA/AE.SQUARROSA(895)/3/MAIZ/4/INQALAB 91/5/PBW-343	SYN-DER
SD205	GAN/AE.SQUARROSA(236)//CETA/AE.SQUARROSA(895)/3/MAIZ/4/INQALAB 91/5/PBW-343	SYN-DER
SD206	GAN/AE.SQUARROSA(236)//CETA/AE.SQUARROSA(895)/3/MAIZ/4/INQALAB 91/5/PBW-343	SYN-DER
SD207	GAN/AE.SQUARROSA(236)//CETA/AE.SQUARROSA(895)/3/MAIZ/4/INQALAB 91/5/PBW-343	SYN-DER
SD208	GAN/AE.SQUARROSA(236)//CETA/AE.SQUARROSA(895)/3/MAIZ/4/INQALAB 91/5/PBW-343	SYN-DER
SD209	GAN/AE.SQUARROSA(236)//CETA/AE.SQUARROSA(895)/3/MAIZ/4/INQALAB 91/5/PBW-343	SYN-DER
BW1	Norin67	Bread wheat
BW2	Lovrin13	Bread wheat
BW3	AARI-2011	Bread wheat
BW4	Bakhtawar-92	Bread wheat
BW5	UFAQ	Bread wheat
BW6	Wafaq-2001	Bread wheat
BW7	Chakwal-50	Bread wheat
BW8	Aas-2011	Bread wheat
BW9	Chakwal-97	Bread wheat
BW10	Faisalabad-2008	Bread wheat
BW11	Faisalabad-85	Bread wheat
BW12	Fareed-06	Bread wheat
BW13	Fksrhad	Bread wheat
BW14	GA-2002	Bread wheat
BW15	Imdad-2005	Bread wheat
BW16	Inqilab-91	Bread wheat
BW17	Iqbal-2000	Bread wheat
BW18	KT-2010	Bread wheat
BW19	Lasani-2008	Bread wheat
BW20	Margalla-99	Bread wheat
BW21	AS-2002	Bread wheat
BW22	MH-97	Bread wheat
BW23	Millat-2011	Bread wheat
BW24	Miraj-08	Bread wheat
BW25	Miraj-2008	Bread wheat
BW26	Moomal-2002	Bread wheat
BW27	NARC-2009	Bread wheat
BW28	Pak-81	Bread wheat
BW29	Auqab-2000	Bread wheat
BW30	Bakhar-2002	Bread wheat
BW31	Seher-2006	Bread wheat
BW32	SH-2003	Bread wheat

## Sheet: Table S2
Table S2. Haplotypes in synthetic-derived wheat population and tagged SNPs in each haplotype. Haplotypes highlighted (yellow) are divergent haplotypes which were not identified in bread wheat population
H. No.	CHR	BP1	BP2	KB	NSNPS	SNPS
H1	1	1211935	1235802	23.868	4	IWB7208|IWB72726|IWB61124|IWB57868
H2	1	1337044	1339718	2.675	3	IWB29495|IWB61980|IWB525
H3	1	2218467	2230021	11.555	6	IWB9191|IWB48030|IWB30871|IWB31956|IWB58726|IWB22174
H4	1	3930938	3933581	2.644	2	IWB65808|IWB65677
H5	1	8312143	8329597	17.455	2	IWB11117|IWB20957
H6	1	9105049	9122948	17.9	3	IWB6172|IWB27228|IWB29039
H7	1	9579639	9579957	0.319	4	IWB73129|IWB7333|IWB45715|IWB43759
H8	1	9580170	9587126	6.957	2	IWB65069|IWB28223
H9	1	9980735	10054613	73.879	5	IWB61317|IWB61318|IWB43053|IWB35459|IWB54709
H10	1	10068873	10068883	0.011	2	IWB73112|IWB59783
H11	1	10068982	10069841	0.86	3	IWB71462|IWB12795|IWB14618
H12	1	11571773	11571928	0.156	3	IWB69234|IWB59323|IWB59322
H13	1	11934111	11941714	7.604	5	IWB35145|IWB65627|IWB11297|IWB26603|IWB22151
H14	1	12306177	12314502	8.326	2	IWB7493|IWB27788
H15	1	12364345	12505357	141.013	5	IWB10921|IWB10922|IWB75289|IWB71171|IWB60070
H16	1	14056115	14254026	197.912	7	IWB73615|IWB21663|IWB7351|IWB12126|IWB72127|IWB72128|IWB7627
H17	1	14519976	14520984	1.009	2	IWB63565|IWB63564
H18	1	15435227	15438849	3.623	5	IWB1229|IWB55142|IWB72793|IWB59016|IWB72794
H19	1	20092842	20094515	1.674	5	IWB1071|IWB56359|IWB7233|IWB3519|IWB67283
H20	1	20977373	21046405	69.033	4	IWB57361|IWB50401|IWB42930|IWB59245
H21	1	26958927	26961670	2.744	4	IWB47586|IWA4164|IWA4163|IWB60691
H22	1	28611740	28620434	8.695	3	IWB3682|IWB40979|IWB28549
H23	1	29191273	29191897	0.625	3	IWB40844|IWB34995|IWA7796
H24	1	33372371	33373212	0.842	2	IWB68106|IWB73417
H25	1	33375641	33375719	0.079	2	IWB47933|IWB35755
H26	1	36565689	36569697	4.009	3	IWB66891|IWB28624|IWB72799
H27	1	38729934	38731790	1.857	3	IWB35770|IWB26816|IWB60976
H28	1	46236257	46239719	3.463	2	IWB10025|IWB22052
H29	1	47791220	47791715	0.496	3	IWB72042|IWB72041|IWB4326
H30	1	49097391	49153603	56.213	4	IWB26888|IWB74010|IWB3515|IWB36084
H31	1	92567883	92570793	2.911	2	IWB36144|IWB34385
H32	1	111131501	111131553	0.053	2	IWB31623|IWB31624
H33	1	111971033	112036549	65.517	4	IWB58472|IWB48097|IWB45372|IWA7439
H34	1	113857847	113860399	2.553	2	IWB11756|IWB11503
H35	1	155693919	155697373	3.455	3	IWB28131|IWB69335|IWB22450
H36	1	168739932	168742497	2.566	2	IWB63682|IWB25439
H37	1	177477952	177481329	3.378	2	IWB60543|IWB59329
H38	1	182069350	182176198	106.849	4	IWB35084|IWB39079|IWB39078|IWB20606
H39	1	208681924	208682116	0.193	2	IWB50397|IWB51225
H40	1	222917713	222918928	1.216	3	IWB52514|IWB35579|IWB20564
H41	1	238653648	238680839	27.192	3	IWB10960|IWB57634|IWB3358
H42	1	251585507	251589909	4.403	6	IWB46069|IWB3143|IWB21300|IWA8034|IWA8035|IWB21299
H43	1	251590814	251592122	1.309	4	IWB19851|IWB19850|IWB50887|IWB28775
H44	1	279824931	279841128	16.198	8	IWB27146|IWB53408|IWB56374|IWB59775|IWB54643|IWB68771|IWB68271|IWB55832
H45	1	290125112	290125991	0.88	2	IWB6380|IWB72311
H46	1	294858516	294860698	2.183	3	IWB45313|IWB57485|IWB59609
H47	1	298037447	298116864	79.418	6	IWB23434|IWB31380|IWB6962|IWB12189|IWB44535|IWB44534
H48	1	301197534	301197748	0.215	3	IWB6933|IWB71416|IWB71415
H49	1	301776617	301897892	121.276	5	IWB34951|IWB7828|IWB51523|IWB51522|IWB36224
H50	1	304037445	304040811	3.367	4	IWB34735|IWB43578|IWB61408|IWA7879
H51	1	304998022	305003377	5.356	2	IWA7922|IWB57739
H52	1	343681314	343682053	0.74	2	IWB11660|IWB24089
H53	1	344480803	344483035	2.233	2	IWB35080|IWA3473
H54	1	345308515	345308642	0.128	2	IWB9780|IWB54199
H55	1	351882191	352026316	144.126	4	IWB53086|IWB19762|IWB49169|IWA7241
H56	1	353253752	353256307	2.556	5	IWA7677|IWB31690|IWB45374|IWB30957|IWA8198
H57	1	353625998	353628563	2.566	2	IWB6103|IWA3536
H58	1	354823522	354950372	126.851	5	IWB13493|IWB13492|IWB13491|IWB3507|IWB31366
H59	1	355322025	355335949	13.925	3	IWB30269|IWB25391|IWB23033
H60	1	356474597	356474628	0.032	2	IWB48847|IWB35853
H61	1	369085792	369089246	3.455	2	IWB21126|IWB35351
H62	1	370093248	370107540	14.293	7	IWB31640|IWB47404|IWB11190|IWB72896|IWB72418|IWB35364|IWB57290
H63	1	375468537	375475003	6.467	3	IWA42|IWB35883|IWB10918
H64	1	376137625	376139911	2.287	3	IWB46432|IWA7104|IWB30251
H65	1	380953953	381097037	143.085	6	IWB49136|IWB30625|IWB25621|IWB53107|IWB55677|IWB10292
H66	1	432974967	432979315	4.349	4	IWB20307|IWB20306|IWB52241|IWB35117
H67	1	434425738	434426050	0.313	3	IWB61373|IWB20695|IWB72053
H68	1	438300748	438366049	65.302	4	IWB37712|IWB19845|IWB20671|IWB38877
H69	1	462433965	462435832	1.868	4	IWA7824|IWB42650|IWB35308|IWB51724
H70	1	464792931	464796333	3.403	3	IWA7862|IWB35810|IWB2937
H71	1	471167104	471167536	0.433	2	IWA1499|IWA1500
H72	1	471698401	471700365	1.965	2	IWB40349|IWB21382
H73	1	473636661	473637106	0.446	2	IWB52324|IWB52305
H74	1	477654721	477654958	0.238	2	IWB40291|IWA8070
H75	1	480755333	480832550	77.218	4	IWB8255|IWB7423|IWA4179|IWB36168
H76	1	481655105	481757596	102.492	4	IWB11516|IWB38496|IWA4126|IWB70213
H77	1	482278930	482337574	58.645	6	IWB34496|IWB7216|IWB5807|IWB35955|IWB40233|IWB35957
H78	1	482769930	482966613	196.684	4	IWB13783|IWB61100|IWB24988|IWB64265
H79	1	484332098	484335868	3.771	3	IWB34656|IWB56592|IWA7577
H80	1	485002381	485003352	0.972	3	IWB20856|IWA4117|IWA4116
H81	1	485228982	485356467	127.486	5	IWB10679|IWB25179|IWA7898|IWB42886|IWB3806
H82	1	487012079	487017842	5.764	2	IWB27052|IWB46302
H83	1	487731134	487732246	1.113	2	IWB54214|IWA7644
H84	1	488070159	488070684	0.526	2	IWB64622|IWB56612
H85	1	494446833	494450006	3.174	4	IWB30464|IWB7874|IWB54862|IWB19625
H86	1	495706490	495706881	0.392	3	IWB25640|IWB41675|IWB38569
H87	1	497518190	497522725	4.536	3	IWB67072|IWB50788|IWB11628
H88	1	500980317	501030812	50.496	6	IWA7868|IWA7869|IWB35541|IWB2320|IWB49731|IWB64537
H89	1	503372623	503380674	8.052	4	IWB46316|IWB9513|IWB63865|IWB63864
H90	1	504242959	504266758	23.8	5	IWB56355|IWB56354|IWA7871|IWA7573|IWB55587
H91	1	505270123	505270151	0.029	2	IWB74828|IWB11969
H92	1	505283048	505471387	188.34	4	IWB57297|IWB10113|IWA8101|IWB51039
H93	1	505513124	505671996	158.873	4	IWB40044|IWB40969|IWB9335|IWB43631
H94	1	506545094	506553697	8.604	4	IWB9588|IWB46385|IWB49095|IWB40889
H95	1	506854410	506855600	1.191	2	IWB34701|IWB25493
H96	1	508638177	508726017	87.841	4	IWB7753|IWB44038|IWB6944|IWB6974
H97	1	513891668	513893962	2.295	3	IWB38172|IWB35171|IWB52379
H98	1	514136229	514138353	2.125	3	IWA2488|IWB36631|IWB49402
H99	1	515546029	515553315	7.287	3	IWB40942|IWB22509|IWB60627
H100	1	517400245	517489531	89.287	10	IWB27332|IWB23140|IWB28402|IWB51584|IWB43588|IWB53633|IWB53632|IWB23141|IWB58118|IWB58119
H101	1	522501043	522535185	34.143	4	IWB8167|IWB8166|IWB25102|IWB36623
H102	1	527951967	527955283	3.317	3	IWA7144|IWB2101|IWA7145
H103	1	530173184	530232630	59.447	7	IWB64795|IWB7965|IWB13864|IWB47390|IWB60784|IWA5493|IWB6118
H104	1	530581918	530594278	12.361	2	IWB46859|IWB31061
H105	1	532245630	532253795	8.166	6	IWA8212|IWB71487|IWB36553|IWB11513|IWB73452|IWB73451
H106	1	533732374	533733515	1.142	6	IWB72587|IWB72586|IWB72585|IWB72589|IWB72588|IWB28382
H107	1	534262751	534265650	2.9	3	IWB21700|IWB6029|IWA1081
H108	1	536431326	536614333	183.008	6	IWB20654|IWB60140|IWB12454|IWB6995|IWB12579|IWB31771
H109	1	536958715	536963457	4.743	2	IWB59223|IWB26829
H110	1	539965049	540143811	178.763	7	IWB55184|IWB4075|IWA3434|IWB36087|IWB23854|IWB23855|IWB35025
H111	1	541434672	541632776	198.105	5	IWB36711|IWB61497|IWB49670|IWB72493|IWB53529
H112	1	541893860	542003186	109.327	4	IWB34352|IWB64984|IWB64983|IWB31625
H113	1	543961391	544055301	93.911	5	IWB11932|IWA1195|IWB7515|IWB20162|IWB11109
H114	1	544055625	544170185	114.561	4	IWB10986|IWB56724|IWB10475|IWB10474
H115	1	544367614	544374305	6.692	2	IWB12600|IWB75206
H116	1	544376642	544391430	14.789	2	IWB60125|IWB8121
H117	1	545888549	545891354	2.806	4	IWB1856|IWB8040|IWB59500|IWB59501
H118	1	546036376	546212924	176.549	7	IWB34750|IWB36967|IWB73306|IWB73305|IWB41933|IWB51733|IWB27519
H119	1	547299438	547301056	1.619	2	IWB34672|IWB28224
H120	1	549420559	549420588	0.03	2	IWB64556|IWB64553
H121	1	551315378	551462819	147.442	8	IWB41243|IWB37168|IWB1403|IWB62509|IWB34758|IWB52277|IWB52276|IWB30452
H122	1	551982045	551982302	0.258	3	IWB66919|IWB66920|IWB5855
H123	1	558185349	558261723	76.375	4	IWB3536|IWB73464|IWB47411|IWB55224
H124	1	558489947	558591923	101.977	9	IWB58389|IWB25587|IWA8135|IWB10613|IWA7924|IWB9856|IWA1015|IWA1118|IWB73626
H125	1	558977946	558979439	1.494	3	IWB73444|IWB73445|IWB14091
H126	1	566010033	566011065	1.033	5	IWB72160|IWB72161|IWB72162|IWB72163|IWB72159
H127	1	566477746	566478096	0.351	2	IWB41552|IWB41551
H128	1	566480220	566602411	122.192	5	IWB1256|IWB68712|IWB766|IWA886|IWB77
H129	1	566640119	566689438	49.32	6	IWB61310|IWB53317|IWB53318|IWB53319|IWB48480|IWB61555
H130	1	567976370	567976500	0.131	2	IWB24001|IWB24000
H131	1	568011029	568012770	1.742	2	IWB52532|IWB62751
H132	1	568013320	568025559	12.24	2	IWB62752|IWB74107
H133	1	571270032	571291469	21.438	4	IWB35045|IWB30172|IWB73557|IWA7316
H134	1	571788253	571788331	0.079	3	IWB69144|IWB69143|IWB69142
H135	1	572020105	572020346	0.242	2	IWB3350|IWB3351
H136	1	573233463	573333466	100.004	6	IWB14279|IWA7757|IWB51467|IWB51468|IWB57157|IWA7893
H137	1	574827524	574831161	3.638	2	IWB29684|IWB31676
H138	1	575215721	575363705	147.985	4	IWB34929|IWB29697|IWB22955|IWB54198
H139	1	580422440	580496917	74.478	8	IWB11395|IWB6843|IWB43929|IWB73184|IWB58886|IWB58885|IWB47248|IWB73664
H140	1	581585520	581585562	0.043	2	IWA8051|IWB69908
H141	1	581829005	581830275	1.271	3	IWB53622|IWB12340|IWB51036
H142	1	584674470	584674500	0.031	2	IWB434|IWB435
H143	1	586913922	586914453	0.532	3	IWB10518|IWB10791|IWB10491
H144	1	586993822	586997163	3.342	2	IWB38|IWB10516
H145	1	588301224	588301363	0.14	2	IWB60791|IWB6421
H146	1	588902922	588903497	0.576	3	IWB37|IWB59296|IWB26254
H147	1	590002502	590003201	0.7	2	IWB8606|IWB10132
H148	1	591091660	591093693	2.034	3	IWB61544|IWB47266|IWB58708
H149	1	591097833	591155427	57.595	4	IWB44295|IWB60808|IWB60809|IWB31545
H150	1	593284106	593301487	17.382	3	IWB73764|IWB7910|IWB31181
H151	1	593397496	593550635	153.14	5	IWB41992|IWB71743|IWB75215|IWB71744|IWB71745
H152	2	1417711	1533474	115.764	9	IWB43258|IWB35663|IWB35518|IWB45437|IWB6864|IWB34755|IWB11805|IWB58459|IWB10529
H153	2	3413777	3446025	32.249	13	IWB65684|IWB31727|IWB34164|IWB65657|IWB65974|IWB66013|IWB66008|IWB58765|IWB40674|IWB54189|IWB65804|IWB65361|IWB65492
H154	2	3448531	3456976	8.446	3	IWB7613|IWB73945|IWB3972
H155	2	3471490	3473364	1.875	3	IWB65682|IWB70813|IWB70814
H156	2	3837996	3838543	0.548	2	IWB65666|IWB65360
H157	2	3918527	3922622	4.096	2	IWB66125|IWB38291
H158	2	4320839	4518688	197.85	6	IWB47800|IWB7122|IWB74219|IWB7791|IWB74221|IWB55606
H159	2	7187840	7188709	0.87	2	IWA4801|IWA4800
H160	2	9082105	9089341	7.237	2	IWB6905|IWB8015
H161	2	9839723	9844082	4.36	2	IWB11310|IWB26730
H162	2	10075309	10075570	0.262	2	IWB43001|IWA7398
H163	2	10102055	10204997	102.943	4	IWB10492|IWB71754|IWB43758|IWA406
H164	2	11633801	11634623	0.823	2	IWB5992|IWB6008
H165	2	11859086	11885362	26.277	6	IWB40971|IWB35936|IWB36183|IWB59785|IWB38368|IWB26731
H166	2	15166232	15171386	5.155	3	IWB73359|IWB71509|IWB30826
H167	2	15284403	15284478	0.076	2	IWB64760|IWB12258
H168	2	15439329	15449332	10.004	2	IWB12347|IWB44849
H169	2	20587566	20589249	1.684	3	IWB34457|IWB72107|IWB11671
H170	2	20589424	20593922	4.499	3	IWB69805|IWB6520|IWB55143
H171	2	28561554	28563946	2.393	3	IWB72788|IWB72782|IWB35360
H172	2	30730981	30731062	0.082	2	IWB53833|IWB59981
H173	2	33976972	33984900	7.929	2	IWB42630|IWB31800
H174	2	38910582	38911212	0.631	2	IWB7923|IWB72705
H175	2	38911256	38911372	0.117	2	IWB36161|IWB7167
H176	2	40186200	40199610	13.411	2	IWB34743|IWB48577
H177	2	42349315	42350954	1.64	2	IWB36174|IWB74006
H178	2	50184218	50186284	2.067	3	IWB11334|IWB35982|IWB7840
H179	2	52899773	53050928	151.156	4	IWB50944|IWB11481|IWB7174|IWB35754
H180	2	54876969	54883868	6.9	6	IWB27167|IWB39764|IWB51586|IWB29475|IWA7480|IWB35128
H181	2	56311958	56319754	7.797	5	IWB41867|IWB24659|IWB60710|IWB35375|IWB40373
H182	2	57712478	57783614	71.137	5	IWB35804|IWB36177|IWB47034|IWA1191|IWB40235
H183	2	58249232	58251207	1.976	2	IWA3508|IWA3506
H184	2	59456917	59601184	144.268	6	IWB7638|IWB27824|IWB9695|IWB10703|IWB60705|IWA7117
H185	2	67015100	67032009	16.91	3	IWB43158|IWB46387|IWB50464
H186	2	68081219	68084043	2.825	3	IWB36874|IWB36875|IWB44280
H187	2	68834465	68845292	10.828	2	IWA6773|IWA5494
H188	2	69542609	69543259	0.651	5	IWB12231|IWB36665|IWB7401|IWB939|IWB12867
H189	2	69825104	69907136	82.033	4	IWB69054|IWB35744|IWB11309|IWB47506
H190	2	71623679	71623695	0.017	2	IWB58093|IWB74242
H191	2	91557535	91557656	0.122	2	IWB34541|IWB5982
H192	2	93913623	93914935	1.313	2	IWB35775|IWB35599
H193	2	94226689	94226821	0.133	3	IWB23524|IWB23525|IWB63115
H194	2	94827681	94979752	152.072	9	IWB61427|IWB47684|IWB53143|IWB36013|IWB74654|IWB41878|IWA8199|IWB62561|IWB47893
H195	2	98722083	98724621	2.539	3	IWB61818|IWB7232|IWB59229
H196	2	99594508	99599339	4.832	5	IWB8598|IWB67269|IWB46306|IWB10407|IWB10406
H197	2	104467913	104468992	1.08	2	IWB8875|IWB35366
H198	2	104772324	104772866	0.543	2	IWB38801|IWB24307
H199	2	106765443	106885964	120.522	10	IWB2120|IWB49541|IWB5791|IWB11458|IWB11931|IWB11930|IWB28429|IWB52544|IWB56246|IWB26351
H200	2	107133439	107136494	3.056	6	IWB43365|IWB58265|IWB62541|IWB63445|IWB4795|IWB4843
H201	2	109729396	109729839	0.444	3	IWB52893|IWB49368|IWB12558
H202	2	111368361	111371096	2.736	4	IWB35824|IWB70091|IWB34622|IWB60822
H203	2	112203059	112369952	166.894	4	IWA4093|IWB39683|IWB6102|IWB13048
H204	2	117170255	117188037	17.783	4	IWB11223|IWB52125|IWB35828|IWB58147
H205	2	119048388	119121106	72.719	5	IWB20653|IWB38258|IWB34887|IWB50329|IWB60223
H206	2	119884470	119885937	1.468	2	IWB59519|IWB11384
H207	2	120884101	120884238	0.138	2	IWB11820|IWB11819
H208	2	130010918	130018126	7.209	6	IWB44383|IWB40637|IWB40638|IWB68543|IWB46929|IWB7545
H209	2	130346851	130349221	2.371	3	IWB60732|IWB58317|IWB10448
H210	2	132937636	132938625	0.99	2	IWB11540|IWB8743
H211	2	136645710	136647892	2.183	2	IWB10636|IWB38539
H212	2	137153913	137179536	25.624	3	IWB12555|IWB39791|IWB26851
H213	2	140295692	140297030	1.339	3	IWB12033|IWB12032|IWB31688
H214	2	144931468	144931861	0.394	2	IWB8023|IWB35928
H215	2	145453416	145457167	3.752	7	IWB37654|IWB49766|IWB29987|IWB6773|IWB7124|IWB11291|IWB29600
H216	2	146616138	146617302	1.165	2	IWB48245|IWB48247
H217	2	148897217	148898412	1.196	5	IWA7504|IWB62640|IWB5835|IWB36003|IWB34595
H218	2	150363643	150542964	179.322	4	IWB9360|IWB24029|IWB31731|IWB42865
H219	2	151463903	151470283	6.381	3	IWA7934|IWB7942|IWB31919
H220	2	151842817	151847308	4.492	2	IWB29715|IWB27323
H221	2	154149309	154155916	6.608	2	IWB50728|IWB31951
H222	2	154598386	154598741	0.356	3	IWB36754|IWB31946|IWB2291
H223	2	157901638	157925647	24.01	3	IWB9735|IWB36147|IWB75020
H224	2	163096641	163097068	0.428	2	IWB7186|IWB3477
H225	2	166076411	166078642	2.232	5	IWB34959|IWB6724|IWB12288|IWB12287|IWB23435
H226	2	166590938	166658090	67.153	7	IWB11757|IWB11505|IWB11504|IWB61851|IWB36672|IWB48180|IWB24346
H227	2	172381027	172383664	2.638	2	IWB57269|IWB14444
H228	2	173974395	173975550	1.156	3	IWB54333|IWB23915|IWB33049
H229	2	199574890	199575788	0.899	3	IWB31878|IWB31879|IWB55745
H230	2	211312383	211313859	1.477	3	IWB35133|IWB56500|IWB34885
H231	2	212429593	212435110	5.518	5	IWB41254|IWB49420|IWB24223|IWB26145|IWB58125
H232	2	213910520	213911937	1.418	3	IWB57973|IWB41306|IWB49511
H233	2	249236188	249237598	1.411	3	IWB64576|IWB64577|IWB30738
H234	2	250422895	250422923	0.029	2	IWB54122|IWB25169
H235	2	278461067	278473796	12.73	2	IWB47264|IWB28335
H236	2	278687018	278687112	0.095	2	IWB9806|IWB9805
H237	2	281033134	281039194	6.061	3	IWB75203|IWB7485|IWB27707
H238	2	282277151	282427961	150.811	4	IWB10923|IWB10660|IWB9147|IWB9464
H239	2	297098866	297114948	16.083	2	IWB56464|IWB5596
H240	2	300575312	300577047	1.736	4	IWB31723|IWB31721|IWB72742|IWB72741
H241	2	302760820	302776613	15.794	2	IWB52497|IWB35515
H242	2	314563137	314743797	180.661	8	IWB43111|IWB35740|IWB14377|IWB47026|IWB49800|IWB63062|IWB39745|IWA7219
H243	2	315383705	315530819	147.115	6	IWB63613|IWB70190|IWB63614|IWB70189|IWB54340|IWB62417
H244	2	325286201	325287017	0.817	3	IWB71638|IWB71637|IWB23218
H245	2	327482971	327577768	94.798	4	IWB6209|IWB24606|IWB49507|IWB24607
H246	2	327838994	327958939	119.946	4	IWB49173|IWB25220|IWB6906|IWB74190
H247	2	328642065	328642394	0.33	2	IWB74353|IWB669
H248	2	329484531	329489697	5.167	2	IWB48664|IWB1569
H249	2	330198186	330214153	15.968	3	IWB60321|IWB40931|IWB43992
H250	2	334241840	334241884	0.045	2	IWB45946|IWB45947
H251	2	363477233	363477411	0.179	4	IWB72174|IWB72175|IWB6866|IWB11662
H252	2	367439623	367440899	1.277	3	IWB20542|IWB51549|IWB31732
H253	2	373143352	373144020	0.669	6	IWB67336|IWB67337|IWB36860|IWB44741|IWB67338|IWB44740
H254	2	374319295	374340231	20.937	4	IWB47697|IWB14360|IWB42728|IWB50530
H255	2	379383143	379383435	0.293	3	IWB9008|IWB50917|IWB50916
H256	2	382217102	382222594	5.493	6	IWB50050|IWB5843|IWB72330|IWB40109|IWB71800|IWB8257
H257	2	385157586	385162623	5.038	3	IWB49701|IWB8611|IWB8612
H258	2	408641419	408666624	25.206	7	IWB26258|IWB26257|IWB71008|IWB47637|IWB71458|IWB71457|IWB71459
H259	2	409246561	409275440	28.88	3	IWA106|IWA107|IWB38394
H260	2	409629958	409633334	3.377	4	IWB11880|IWB11881|IWB73732|IWB10049
H261	2	419203611	419204417	0.807	3	IWB35871|IWB12485|IWB12484
H262	2	421094166	421097863	3.698	9	IWB10524|IWB10897|IWB10523|IWB55632|IWB11476|IWB40763|IWB40762|IWB69081|IWB69082
H263	2	421538980	421670854	131.875	5	IWB72597|IWB72598|IWB72599|IWB33215|IWB10642
H264	2	423960747	424077184	116.438	7	IWB192|IWB69736|IWB59327|IWB8148|IWB70318|IWB8147|IWB10823
H265	2	445433971	445434014	0.044	2	IWA8081|IWA8082
H266	2	447165586	447166744	1.159	2	IWB10646|IWB7886
H267	2	449131746	449134824	3.079	2	IWB45996|IWA7119
H268	2	456975386	457009126	33.741	6	IWA7723|IWA7722|IWB63392|IWA7721|IWB68856|IWB60853
H269	2	461298815	461309808	10.994	4	IWB44767|IWB52131|IWB45935|IWB45937
H270	2	471193648	471193960	0.313	3	IWB5511|IWA7594|IWB72533
H271	2	474259725	474451791	192.067	9	IWB51640|IWB31478|IWB14484|IWB14999|IWA890|IWB47330|IWA4197|IWA4198|IWB47412
H272	2	476019745	476034886	15.142	3	IWB71512|IWB31711|IWB14021
H273	2	476876401	476881868	5.468	4	IWB27169|IWB30117|IWB7443|IWB68429
H274	2	477393876	477403655	9.78	5	IWB7992|IWB69496|IWB69495|IWB69494|IWB59187
H275	2	487406155	487407613	1.459	4	IWB72645|IWB60912|IWB72647|IWB72646
H276	2	488208317	488216124	7.808	2	IWB70166|IWB44100
H277	2	489133946	489243986	110.041	4	IWB35922|IWB69772|IWB71511|IWB69973
H278	2	494159077	494160156	1.08	4	IWB7183|IWB51971|IWB62157|IWB34504
H279	2	497781319	497799229	17.911	3	IWB62507|IWB73484|IWB27300
H280	2	508394037	508553997	159.961	4	IWB45407|IWB53019|IWB25483|IWB57335
H281	2	510980625	510980941	0.317	2	IWB72738|IWA7836
H282	2	512631446	512635739	4.294	6	IWB13329|IWB63365|IWB1335|IWB1336|IWB31661|IWB4238
H283	2	517906735	517907283	0.549	4	IWB68867|IWB68866|IWB68865|IWB68864
H284	2	520468900	520528042	59.143	5	IWB1576|IWB29900|IWA7560|IWA4203|IWA7982
H285	2	520785409	520810752	25.344	3	IWB52413|IWB60063|IWB10630
H286	2	521218935	521225011	6.077	2	IWB13774|IWB72078
H287	2	527001385	527001465	0.081	3	IWB51604|IWA7787|IWB51605
H288	2	530478404	530668848	190.445	4	IWB8048|IWB70168|IWB5737|IWB46559
H289	2	530959458	531004818	45.361	8	IWB36395|IWB6174|IWB36348|IWB36392|IWB35683|IWB63416|IWB859|IWB73734
H290	2	532163337	532172954	9.618	8	IWB6543|IWB35652|IWB6215|IWB26950|IWB26949|IWB26948|IWB24077|IWB19579
H291	2	535797834	535799241	1.408	3	IWB13176|IWB13836|IWB70733
H292	2	540720836	540847894	127.059	4	IWB47566|IWB9692|IWB26192|IWB23636
H293	2	542431544	542431924	0.381	4	IWA1231|IWA775|IWB14729|IWB13393
H294	2	542927221	543086017	158.797	5	IWB8134|IWB29159|IWB31909|IWB48422|IWB8507
H295	2	544130182	544132316	2.135	3	IWB56695|IWB56696|IWB27292
H296	2	545207315	545211809	4.495	3	IWB34737|IWB39290|IWB39291
H297	2	547968291	547975331	7.041	3	IWB72079|IWB73005|IWB73004
H298	2	548536105	548679383	143.279	23	IWB41967|IWB57391|IWB71351|IWB20648|IWB35192|IWB53061|IWB71352|IWB40124|IWB71353|IWB71354|IWB38882|IWB71355|IWB35474|IWB38883|IWB36985|IWB23054|IWB38843|IWB29015|IWB2605|IWB39431|IWB71347|IWB3191|IWB71530
H299	2	548896075	548902866	6.792	2	IWB61864|IWB47303
H300	2	548905092	548970108	65.017	6	IWA4139|IWA7275|IWB40176|IWB42085|IWB39932|IWB30729
H301	2	551010111	551012658	2.548	3	IWB11968|IWA946|IWB13289
H302	2	551013105	551032716	19.612	2	IWB31680|IWB42820
H303	2	553143317	553143857	0.541	3	IWB11811|IWB71348|IWB3677
H304	2	555638118	555775972	137.855	9	IWB28518|IWB35960|IWB5184|IWB30252|IWB11261|IWB56758|IWB24205|IWB11371|IWB73016
H305	2	560494393	560494530	0.138	2	IWA7317|IWB11230
H306	2	563675285	563675996	0.712	2	IWB38151|IWB36872
H307	2	564162696	564162770	0.075	2	IWB73514|IWB35698
H308	2	564908991	564909236	0.246	3	IWB5926|IWB59152|IWB59153
H309	2	565669864	565672799	2.936	2	IWB22510|IWB71367
H310	2	566603683	566763135	159.453	5	IWB47726|IWB71822|IWB164|IWB73693|IWB75197
H311	2	566827364	566838775	11.412	8	IWB10790|IWB10789|IWB35689|IWB41378|IWB64623|IWB8944|IWB70039|IWB70038
H312	2	566838911	566993600	154.69	4	IWB70037|IWB21824|IWB29348|IWB7533
H313	2	568522704	568522749	0.046	2	IWB48875|IWB44942
H314	2	568965829	568968845	3.017	2	IWB3338|IWB3990
H315	2	570294626	570301862	7.237	3	IWA7528|IWA7527|IWA7811
H316	2	570840968	570842645	1.678	4	IWB48255|IWA4091|IWA4090|IWB48254
H317	2	571060133	571176511	116.379	6	IWB40954|IWB40953|IWB11437|IWB40955|IWB19712|IWB45450
H318	2	571437063	571438556	1.494	2	IWB56072|IWA2889
H319	2	572288388	572297030	8.643	5	IWB64027|IWB13336|IWB64025|IWB61202|IWB57197
H320	2	572642554	572681172	38.619	5	IWB34607|IWB50027|IWB27264|IWB53437|IWB39199
H321	2	575863800	576024228	160.429	5	IWB43219|IWB43220|IWB34598|IWB36145|IWB35678
H322	2	577178680	577186958	8.279	3	IWB60916|IWB8678|IWB8677
H323	2	581201734	581205693	3.96	4	IWB53874|IWB47886|IWB48469|IWB73156
H324	2	583091795	583147612	55.818	4	IWB10877|IWB47688|IWB47687|IWB35892
H325	2	583983571	584156288	172.718	4	IWB7953|IWB7179|IWB46336|IWB7258
H326	2	586296064	586300910	4.847	3	IWA5383|IWB53315|IWB53316
H327	2	587473442	587525553	52.112	4	IWB12151|IWB35875|IWB5761|IWB7621
H328	2	588484594	588632195	147.602	8	IWB10381|IWB20585|IWB65251|IWB39058|IWB59663|IWB21176|IWB31027|IWB34625
H329	2	588766793	588766815	0.023	2	IWB22505|IWB22506
H330	2	589071383	589133929	62.547	5	IWB1073|IWB1072|IWB63380|IWB7446|IWB30173
H331	2	591109901	591233339	123.439	6	IWB36342|IWB6222|IWB6179|IWB49552|IWB49553|IWB8312
H332	2	600890404	601007290	116.887	6	IWB26591|IWB41127|IWB63853|IWB63852|IWB63855|IWB9208
H333	2	604551853	604553114	1.262	2	IWB36329|IWB7253
H334	2	608994830	608996477	1.648	3	IWB30242|IWB60066|IWB29758
H335	2	614331747	614455913	124.167	6	IWB66483|IWB66482|IWB36344|IWB42095|IWB42096|IWB3634
H336	2	615112153	615126877	14.725	5	IWB64037|IWB7161|IWA7179|IWB35811|IWB68329
H337	2	619682651	619694218	11.568	9	IWB8293|IWB40585|IWB35479|IWB7290|IWB11914|IWB38554|IWA2308|IWB6709|IWB40040
H338	2	621634660	621636618	1.959	2	IWB9937|IWB9155
H339	2	622466491	622569680	103.19	5	IWB58520|IWB35726|IWA8398|IWB64092|IWB64091
H340	2	623712982	623770763	57.782	8	IWB31454|IWB4407|IWB65180|IWB65181|IWB58356|IWB58355|IWB11211|IWB31201
H341	2	625569801	625571675	1.875	2	IWB28434|IWB71777
H342	2	626070867	626103877	33.011	4	IWB70705|IWB73073|IWB926|IWB72580
H343	2	627946504	628006470	59.967	5	IWA4155|IWA4154|IWA415|IWA4153|IWB72324
H344	2	628514291	628514653	0.363	3	IWB73032|IWB73033|IWB7976
H345	2	629942096	629942243	0.148	2	IWB11958|IWB36732
H346	2	630063122	630063204	0.083	2	IWB54063|IWB62270
H347	2	630831743	630926795	95.053	5	IWB1416|IWB35958|IWA5749|IWB3330|IWB5074
H348	2	631999928	632010482	10.555	4	IWB2871|IWB37326|IWB57791|IWB13458
H349	2	632753887	632754686	0.8	2	IWB47288|IWB28347
H350	2	634150607	634165911	15.305	3	IWB26489|IWB28182|IWB47064
H351	2	636263256	636264240	0.985	4	IWB41894|IWB41895|IWB41897|IWB60344
H352	2	636738190	636753153	14.964	3	IWB53690|IWB2203|IWB8152
H353	2	637621793	637623015	1.223	4	IWB46347|IWB31152|IWB74755|IWB52607
H354	2	637826181	637827971	1.791	5	IWB7144|IWB21546|IWB21547|IWB74534|IWB62674
H355	2	637944895	638015656	70.762	4	IWB34585|IWB11858|IWB13005|IWB75028
H356	2	640157034	640162688	5.655	7	IWB34425|IWB25499|IWB66192|IWB66191|IWB66189|IWB29144|IWB66195
H357	2	640555501	640559394	3.894	6	IWB22011|IWB1371|IWB1374|IWB44899|IWB44898|IWB73882
H358	2	641552767	641632818	80.052	4	IWB1305|IWB42465|IWB42466|IWB28242
H359	2	642476556	642496540	19.985	2	IWB35108|IWB72240
H360	2	642677903	642770655	92.753	4	IWB60663|IWB35340|IWA7422|IWB20313
H361	2	643094924	643246621	151.698	7	IWB6213|IWB6777|IWA7141|IWB11390|IWB36125|IWB24341|IWB13106
H362	2	645571228	645708109	136.882	8	IWB29150|IWB12399|IWB29151|IWB1725|IWB66973|IWB36563|IWB12093|IWB63739
H363	2	646167684	646172248	4.565	5	IWB13876|IWA8543|IWB46686|IWB10454|IWB5810
H364	2	649052239	649053040	0.802	2	IWB46397|IWB73698
H365	2	651542407	651557742	15.336	2	IWB10933|IWB36030
H366	2	652454033	652576177	122.145	5	IWB27057|IWB35065|IWB10224|IWB8004|IWB8005
H367	2	653185425	653185953	0.529	3	IWB64154|IWB35891|IWA1069
H368	2	653888067	654028629	140.563	6	IWB631|IWB36293|IWB73738|IWB73737|IWB73736|IWA8542
H369	2	655781689	655798606	16.918	3	IWB7459|IWB73299|IWB8409
H370	2	657171376	657171805	0.43	3	IWB67874|IWB67873|IWB67870
H371	2	658498330	658531665	33.336	5	IWB58538|IWB3373|IWB31694|IWB62056|IWB3081
H372	2	659380793	659381719	0.927	3	IWB31741|IWB31742|IWB55535
H373	2	660433112	660531737	98.626	6	IWB26010|IWB50473|IWB7869|IWB7870|IWB6507|IWB40255
H374	2	661515587	661517101	1.515	2	IWB31646|IWB72561
H375	2	661633196	661633673	0.478	4	IWB69702|IWB69701|IWB13473|IWB69700
H376	2	662718656	662718672	0.017	2	IWB11006|IWB11007
H377	2	664285795	664302556	16.762	4	IWB68743|IWB35847|IWB72444|IWB72443
H378	2	664598308	664599824	1.517	3	IWB48712|IWB27960|IWB39347
H379	2	665310412	665398865	88.454	5	IWB53347|IWB31978|IWB31979|IWB4686|IWB40483
H380	2	665795613	665795646	0.034	2	IWB29230|IWB29231
H381	2	668200606	668201147	0.542	2	IWB8096|IWB8097
H382	2	670176163	670176203	0.041	2	IWB46597|IWB46598
H383	2	671505564	671505587	0.024	2	IWB22483|IWB4839
H384	2	673161102	673176865	15.764	5	IWB7059|IWB73865|IWB40850|IWB73866|IWB11303
H385	2	673641093	673641139	0.047	2	IWB31719|IWB31718
H386	2	673641821	673743486	101.666	4	IWB71704|IWB6778|IWB56411|IWB61210
H387	2	673784307	673786465	2.159	3	IWB72918|IWB66475|IWB66474
H388	2	674608465	674608545	0.081	2	IWB13852|IWB13853
H389	2	674668225	674670040	1.816	3	IWB57614|IWB57985|IWB48119
H390	2	675559564	675561073	1.51	3	IWB73713|IWB73714|IWB35087
H391	2	676075498	676192519	117.022	5	IWB5411|IWB52856|IWB72943|IWB55628|IWB1997
H392	2	680162646	680163536	0.891	3	IWB68093|IWB35151|IWB68096
H393	2	680863538	680867523	3.986	4	IWB27548|IWB62142|IWB62784|IWB66252
H394	2	682472813	682485413	12.601	2	IWB34435|IWB45606
H395	2	687719783	687720466	0.684	3	IWB73765|IWB73820|IWB7641
H396	2	688767432	688769204	1.773	3	IWB11265|IWA4935|IWB38247
H397	3	85456	108919	23.464	3	IWB44730|IWB36720|IWB65421
H398	3	1860963	1875748	14.786	2	IWB65763|IWB65739
H399	3	1896861	1900532	3.672	2	IWB7133|IWB65404
H400	3	1901611	1902997	1.387	4	IWB62610|IWB65755|IWB37339|IWB37340
H401	3	1907347	1908505	1.159	3	IWB14628|IWB66130|IWB4509
H402	3	1909636	1911298	1.663	3	IWB66136|IWB65665|IWB31615
H403	3	2111021	2147298	36.278	5	IWB34473|IWB55080|IWB43259|IWB3622|IWB19471
H404	3	2281082	2281082	0.001	2	IWB66196|IWB66198
H405	3	3958298	3967331	9.034	3	IWB31195|IWB8742|IWB6740
H406	3	8721495	8727428	5.934	3	IWB17979|IWA4073|IWB8325
H407	3	10257231	10262957	5.727	3	IWB576|IWB21104|IWB43534
H408	3	10661637	10662717	1.081	2	IWB35174|IWB26984
H409	3	12533342	12536848	3.507	6	IWB60472|IWB21001|IWB60470|IWB21003|IWB60473|IWB60471
H410	3	16612783	16788891	176.109	4	IWB6949|IWB13124|IWB12219|IWB7396
H411	3	19127505	19129315	1.811	3	IWB5401|IWB35354|IWB17484
H412	3	20045042	20056215	11.174	2	IWB15693|IWB44231
H413	3	24539690	24539828	0.139	2	IWB7588|IWB7589
H414	3	28199267	28203124	3.858	3	IWB27840|IWB19917|IWB61141
H415	3	32544016	32545531	1.516	6	IWB59650|IWB5767|IWB65041|IWB5768|IWB36051|IWB59652
H416	3	36534982	36536736	1.755	3	IWB60711|IWB60713|IWB63352
H417	3	36832461	36832497	0.037	2	IWB27196|IWB36940
H418	3	38787987	38908668	120.682	4	IWB3894|IWB74807|IWB74806|IWB10764
H419	3	43126632	43281510	154.879	4	IWB4433|IWB34926|IWB35012|IWB26805
H420	3	47713814	47879501	165.688	5	IWB46338|IWB60962|IWB10919|IWB43011|IWB63182
H421	3	49422555	49586495	163.941	5	IWB58499|IWA1193|IWA1192|IWB46003|IWB7925
H422	3	49596665	49603832	7.168	2	IWB7530|IWB11308
H423	3	54912869	54918291	5.423	2	IWB43843|IWB32968
H424	3	59524905	59527379	2.475	2	IWB35739|IWB36080
H425	3	68443140	68446654	3.515	2	IWB10085|IWB35414
H426	3	72904411	72904471	0.061	2	IWB31953|IWB31952
H427	3	77362796	77392435	29.64	5	IWB34444|IWB34561|IWB6592|IWB61003|IWB61004
H428	3	90633741	90649159	15.419	2	IWB29084|IWB15340
H429	3	103350946	103482235	131.29	6	IWB31766|IWB31767|IWB50150|IWB63716|IWB15647|IWB44328
H430	3	130609006	130613415	4.41	3	IWB31826|IWB17376|IWB57349
H431	3	133568476	133569889	1.414	3	IWB35274|IWB35925|IWB30624
H432	3	203319039	203319063	0.025	2	IWB47777|IWB47778
H433	3	227376327	227376393	0.067	2	IWB30185|IWB56965
H434	3	238060383	238069586	9.204	2	IWB43481|IWA8394
H435	3	241477375	241478580	1.206	3	IWB41024|IWB22947|IWB6386
H436	3	243461717	243462061	0.345	3	IWB41126|IWB49892|IWB49891
H437	3	247510814	247518430	7.617	3	IWB30892|IWB508|IWB31560
H438	3	379794383	379795619	1.237	3	IWB74613|IWB35655|IWB6545
H439	3	405111771	405112517	0.747	2	IWB36669|IWB49740
H440	3	408078290	408207683	129.394	8	IWB35382|IWB57981|IWB59019|IWB2577|IWB146|IWB11061|IWB58725|IWB23271
H441	3	408241991	408408474	166.484	8	IWB57155|IWB47546|IWA7276|IWB5962|IWA7170|IWA7171|IWB39618|IWB15375
H442	3	416099680	416128614	28.935	3	IWB26941|IWB60890|IWB35348
H443	3	416619882	416624030	4.149	3	IWB50995|IWB50996|IWB53482
H444	3	424736592	424737017	0.426	2	IWB35053|IWB11589
H445	3	449471097	449471764	0.668	2	IWB36241|IWB41037
H446	3	454175098	454177526	2.429	6	IWB50448|IWB56285|IWB35523|IWB56284|IWB56288|IWB56287
H447	3	455785065	455802372	17.308	2	IWB71793|IWB47904
H448	3	460143564	460152868	9.305	2	IWB26813|IWB9311
H449	3	476257403	476258779	1.377	2	IWB31871|IWB27085
H450	3	478817994	478821058	3.065	3	IWA6255|IWA6523|IWA6522
H451	3	484403563	484417312	13.75	7	IWB6051|IWB34614|IWB41471|IWB11781|IWB57984|IWB27995|IWB24638
H452	3	485105020	485113819	8.8	5	IWB1097|IWB57623|IWB1489|IWB58088|IWB27384
H453	3	485436660	485559318	122.659	8	IWB9028|IWB41182|IWB29851|IWB27806|IWB47408|IWA8214|IWA8213|IWB4165
H454	3	485559665	485755364	195.7	9	IWB49521|IWB26291|IWB55626|IWB42332|IWB55630|IWB36215|IWB6124|IWB25377|IWB47916
H455	3	487168787	487171936	3.15	2	IWB64331|IWB3443
H456	3	487633902	487642090	8.189	3	IWB48302|IWB16323|IWB29616
H457	3	487952378	487952610	0.233	3	IWB58485|IWB46801|IWB46799
H458	3	487957168	487958917	1.75	2	IWB7196|IWB40
H459	3	488571064	488573055	1.992	3	IWB67027|IWB26765|IWB26766
H460	3	488573164	488575153	1.99	3	IWB45184|IWB31955|IWB45182
H461	3	488576303	488577792	1.49	5	IWB25247|IWB49948|IWB25248|IWB6266|IWB6050
H462	3	488973094	488976906	3.813	2	IWB21243|IWB6319
H463	3	489537554	489540540	2.987	8	IWB41348|IWB49454|IWB30012|IWB43272|IWB29934|IWB74004|IWB49192|IWB49193
H464	3	490926825	491044424	117.6	6	IWB6360|IWB29609|IWB48948|IWA2325|IWB61688|IWB55371
H465	3	491636284	491636324	0.041	2	IWB6105|IWB5990
H466	3	492534059	492609921	75.863	6	IWB8060|IWB1650|IWA7477|IWB12464|IWA4119|IWA7488
H467	3	493485242	493606755	121.514	10	IWB64149|IWB64148|IWB64147|IWB64146|IWB64145|IWB64144|IWB64150|IWB28461|IWB28462|IWB28463
H468	3	493764982	493936129	171.148	6	IWB56380|IWB35305|IWB36351|IWB54456|IWB27538|IWB21516
H469	3	494468618	494553967	85.35	4	IWB57242|IWB57240|IWB23508|IWB48914
H470	3	541468867	541469313	0.447	2	IWA5047|IWA5046
H471	3	615455315	615458736	3.422	2	IWA2795|IWA1867
H472	3	699196867	699198406	1.54	2	IWA1485|IWA1484
H473	3	728910585	728919347	8.763	2	IWA1732|IWA4497
H474	4	2640610	2658364	17.755	4	IWB20060|IWA2427|IWA6391|IWB12250
H475	4	3100538	3111127	10.59	3	IWB30883|IWB30800|IWB7398
H476	4	3797519	3798021	0.503	3	IWB46564|IWB46565|IWB56956
H477	4	3962504	3967031	4.528	3	IWB5881|IWB6867|IWB64569
H478	4	5224861	5239015	14.155	3	IWB11454|IWB63496|IWB65810
H479	4	5306285	5309803	3.519	3	IWB65638|IWB65777|IWB71756
H480	4	6435439	6436264	0.826	2	IWB74554|IWB25128
H481	4	7545332	7550063	4.732	2	IWB73389|IWB44018
H482	4	10993078	10993969	0.892	5	IWB100|IWB25230|IWB99|IWB57536|IWB71923
H483	4	11909692	11915846	6.155	2	IWB6584|IWB47285
H484	4	12592477	12593954	1.478	6	IWB11453|IWB42972|IWA422|IWB32448|IWB6257|IWB23503
H485	4	12912621	12912650	0.03	2	IWB3679|IWB3678
H486	4	13814320	13828965	14.646	2	IWB59814|IWB68413
H487	4	14886044	14889328	3.285	2	IWB73229|IWB73231
H488	4	15608865	15623653	14.789	3	IWB53288|IWB36119|IWB61256
H489	4	15882551	15954221	71.671	9	IWB4170|IWB14543|IWB11151|IWB49618|IWB31160|IWB31161|IWB61405|IWB30308|IWB30469
H490	4	16551313	16741513	190.201	7	IWA8274|IWB54181|IWB68412|IWB5947|IWB46288|IWB42130|IWB58321
H491	4	17001416	17001502	0.087	2	IWB240|IWB60729
H492	4	18020276	18165391	145.116	4	IWB46272|IWB69913|IWB73151|IWB47891
H493	4	21252805	21261962	9.158	3	IWB41233|IWB6727|IWB12622
H494	4	28021283	28021754	0.472	2	IWB70935|IWB70916
H495	4	29872264	30071910	199.647	4	IWB5428|IWB13159|IWA1166|IWB4006
H496	4	30133014	30147854	14.841	3	IWB53380|IWB1365|IWB12769
H497	4	30830742	30831056	0.315	2	IWB72125|IWB72126
H498	4	31207310	31209204	1.895	2	IWB44629|IWB6016
H499	4	31953248	31957675	4.428	5	IWB11051|IWB11050|IWB56555|IWB63137|IWB63138
H500	4	31978681	32153618	174.938	11	IWB9877|IWB29385|IWB7354|IWB63132|IWB48972|IWB36267|IWB3665|IWB22684|IWB10663|IWB10499|IWB10500
H501	4	36039990	36050497	10.508	6	IWB67308|IWB67306|IWB67305|IWB67304|IWB45657|IWA2434
H502	4	36629146	36632227	3.082	4	IWB54293|IWB34575|IWB39005|IWB51686
H503	4	40820007	40823154	3.148	2	IWB71517|IWB7033
H504	4	41232496	41236605	4.11	6	IWB52303|IWB52304|IWA4216|IWA4215|IWA4214|IWA4213
H505	4	42392241	42475903	83.663	5	IWB40186|IWB25267|IWB41735|IWB72462|IWB72463
H506	4	46107371	46108442	1.072	3	IWB50806|IWB53117|IWB35347
H507	4	47830424	47832823	2.4	2	IWB70087|IWB32008
H508	4	47833216	47833390	0.175	2	IWB69417|IWB69418
H509	4	48868311	48874283	5.973	3	IWB11734|IWB46583|IWB53010
H510	4	49451595	49453189	1.595	4	IWB30109|IWB30108|IWB24281|IWB24282
H511	4	74107854	74164556	56.703	5	IWB8064|IWB8065|IWB71526|IWB50422|IWB73981
H512	4	74788492	74877814	89.323	6	IWB71879|IWB71880|IWB9926|IWB22683|IWB30556|IWB55048
H513	4	74960748	74962261	1.514	4	IWB53663|IWB53662|IWB45777|IWB53660
H514	4	75137505	75316383	178.879	7	IWB74009|IWB7843|IWB7844|IWB32426|IWB35722|IWB72304|IWB73597
H515	4	77157945	77335035	177.091	4	IWB8679|IWB8202|IWB1573|IWB8937
H516	4	78328762	78335381	6.62	6	IWA901|IWB35327|IWA991|IWB50153|IWB62645|IWB47747
H517	4	79748538	79750432	1.895	3	IWB6749|IWB62989|IWB11079
H518	4	85595944	85600205	4.262	4	IWB51634|IWB21265|IWB46368|IWB21267
H519	4	87436482	87461773	25.292	3	IWB28709|IWB47511|IWB12320
H520	4	87855234	87878765	23.532	5	IWB45265|IWB55871|IWB40453|IWB32310|IWB74831
H521	4	90763826	90764013	0.188	2	IWB49427|IWB54515
H522	4	93881145	93885887	4.743	3	IWB71621|IWB71620|IWB71619
H523	4	98123291	98124124	0.834	3	IWB45531|IWB73897|IWB664
H524	4	101378479	101382979	4.501	3	IWA424|IWB69592|IWB23707
H525	4	101994024	101994279	0.256	3	IWB72860|IWB62501|IWB72859
H526	4	104231435	104237230	5.796	2	IWA1717|IWA5392
H527	4	104875995	104972294	96.3	6	IWA7248|IWA7389|IWB5320|IWB49279|IWB5321|IWB48579
H528	4	118446554	118446612	0.059	2	IWB21864|IWB21865
H529	4	141157394	141260048	102.655	4	IWB56954|IWB27915|IWB71086|IWB57901
H530	4	165924170	165924401	0.232	2	IWB53484|IWB1773
H531	4	180212394	180216468	4.075	2	IWB50765|IWB43505
H532	4	182146145	182303394	157.25	9	IWB20220|IWB35165|IWB54972|IWB38304|IWB51493|IWB51490|IWB51491|IWB51492|IWB35372
H533	4	187820524	187955712	135.189	4	IWB34583|IWB52967|IWB14710|IWB38974
H534	4	191879545	191899728	20.184	4	IWB38952|IWA3007|IWB39195|IWB14852
H535	4	195819324	195826363	7.04	3	IWB26383|IWB41863|IWB59449
H536	4	196120655	196126467	5.813	3	IWB21153|IWB63018|IWB55671
H537	4	205192664	205200946	8.283	2	IWB10114|IWB54077
H538	4	222595183	222596727	1.545	3	IWB28594|IWA8016|IWB28593
H539	4	275929586	275932923	3.338	2	IWB57941|IWB46348
H540	4	293892230	293893532	1.303	2	IWB11160|IWB38866
H541	4	318993393	318993540	0.148	2	IWA4836|IWA4835
H542	4	319042351	319045668	3.318	2	IWB10443|IWB10151
H543	4	324291374	324293843	2.47	3	IWB35277|IWB34428|IWB10736
H544	4	341921016	341929711	8.696	3	IWB50004|IWA1103|IWB30858
H545	4	348243238	348243491	0.254	2	IWB38929|IWB38930
H546	4	349721214	349726161	4.948	2	IWB9775|IWA8210
H547	4	353470223	353470589	0.367	2	IWB52643|IWB35029
H548	4	355388595	355398060	9.466	2	IWB50948|IWB52249
H549	4	361216227	361385469	169.243	5	IWA7041|IWB55015|IWB34742|IWB19750|IWB49117
H550	4	376079975	376081821	1.847	2	IWB8609|IWB37359
H551	4	376137475	376145201	7.727	2	IWA5631|IWA4265
H552	4	384878929	384890633	11.705	3	IWB35186|IWB20771|IWB20772
H553	4	389222064	389224050	1.987	3	IWA7837|IWB35622|IWB56552
H554	4	394013486	394015252	1.767	3	IWB35237|IWB38680|IWB38681
H555	4	408083388	408084233	0.846	2	IWB52560|IWB39376
H556	4	410878765	410879523	0.759	5	IWB60731|IWB38404|IWB52727|IWB52728|IWB20238
H557	4	412510863	412513870	3.008	2	IWB55139|IWB32147
H558	4	414985100	414991171	6.072	3	IWB58350|IWB34501|IWB58225
H559	4	423190861	423204105	13.245	3	IWB57229|IWB1557|IWB35263
H560	4	423778853	423779875	1.023	3	IWB35118|IWB22123|IWB20078
H561	4	437161047	437161097	0.051	2	IWB56330|IWB56331
H562	4	447945438	447945775	0.338	2	IWB51019|IWB51020
H563	4	451001994	451026560	24.567	3	IWB58676|IWB61262|IWB34366
H564	4	470237147	470238327	1.181	2	IWB32212|IWB57773
H565	4	486204820	486210843	6.024	2	IWB1463|IWA7569
H566	4	498041052	498105726	64.675	5	IWB51153|IWB39681|IWB52548|IWB57685|IWB51504
H567	4	504274071	504275383	1.313	2	IWB35580|IWB24520
H568	4	504329462	504344632	15.171	5	IWB14023|IWA5550|IWB35068|IWA7464|IWB5448
H569	4	515945754	515956944	11.191	2	IWB10949|IWB62891
H570	4	549678635	549678785	0.151	2	IWB72693|IWB59607
H571	4	556987560	556987830	0.271	3	IWB2233|IWB2234|IWB2235
H572	4	558527968	558529515	1.548	3	IWB59834|IWB58930|IWB11422
H573	4	562509360	562604305	94.946	6	IWB13477|IWB8220|IWB8221|IWB48460|IWA71|IWB61279
H574	4	603524602	603687247	162.646	5	IWA1174|IWB26874|IWB24660|IWB35417|IWB70024
H575	4	647927316	647927932	0.617	3	IWB6549|IWB64705|IWB64704
H576	4	659158400	659160519	2.12	2	IWA1892|IWA1878
H577	4	675896598	675938628	42.031	4	IWB31087|IWA7547|IWB32663|IWB32664
H578	4	676231961	676383880	151.92	9	IWB57080|IWB12570|IWB12571|IWB7051|IWB11139|IWB10432|IWB10431|IWB64479|IWB8169
H579	4	676716777	676720178	3.402	4	IWB43378|IWB31019|IWB30633|IWB36142
H580	4	677528757	677529314	0.558	3	IWB32347|IWB32348|IWB60230
H581	4	686857786	686862886	5.101	7	IWB49283|IWB50309|IWB50176|IWB9494|IWA7998|IWB52244|IWB61750
H582	4	690932236	690932258	0.023	2	IWB32430|IWB32429
H583	4	691217702	691224816	7.115	6	IWB40126|IWB28454|IWB28453|IWA7339|IWB34517|IWB47525
H584	4	692633289	692755101	121.813	4	IWB22730|IWA2092|IWB46979|IWB58832
H585	4	693241997	693293527	51.531	5	IWB1036|IWA4732|IWB51127|IWB43664|IWB43663
H586	4	705823491	705953430	129.94	4	IWB29791|IWB64643|IWB22458|IWB39123
H587	4	709040998	709041906	0.909	3	IWB52510|IWB52511|IWA7166
H588	4	709836654	709837034	0.381	4	IWB36062|IWB63030|IWB61803|IWB61802
H589	4	709837201	709844669	7.469	3	IWB5270|IWA7148|IWB39268
H590	4	709847198	709850046	2.849	2	IWB2708|IWB49008
H591	4	710099437	710188564	89.128	4	IWB28641|IWB28642|IWB28643|IWB43212
H592	4	711077273	711077692	0.42	2	IWB7166|IWB11452
H593	4	711640868	711641821	0.954	3	IWB26848|IWB25974|IWB26847
H594	4	712706867	712720983	14.117	3	IWB61342|IWB55873|IWB32363
H595	4	715030177	715030290	0.114	2	IWA2874|IWA2875
H596	4	715303191	715304346	1.156	3	IWB53712|IWB53710|IWB53711
H597	4	716164690	716169543	4.854	2	IWB2020|IWB57860
H598	4	726024953	726033408	8.456	2	IWB33200|IWB32923
H599	4	728758580	728776603	18.024	2	IWA8385|IWB39377
H600	4	734349305	734352082	2.778	2	IWB62592|IWB62594
H601	4	734524487	734525462	0.976	2	IWB28806|IWA5066
H602	4	734526973	734529326	2.354	3	IWB44259|IWB44258|IWB29972
H603	4	739448856	739449555	0.7	2	IWB72722|IWB72723
H604	4	739712930	739877512	164.583	4	IWB72716|IWB46468|IWB44731|IWB11146
H605	4	740010373	740012641	2.269	2	IWB44394|IWB835
H606	4	740361057	740366148	5.092	3	IWB43225|IWA8041|IWA8040
H607	4	744283347	744448020	164.674	5	IWB26296|IWB26297|IWB7444|IWB34772|IWB71497
H608	4	744809655	744820647	10.993	5	IWB72757|IWB7758|IWB28945|IWB49774|IWB1094
H609	4	746682363	746682463	0.101	3	IWB73568|IWB2430|IWB65315
H610	4	747610032	747611792	1.761	2	IWB51443|IWB58213
H611	4	752092809	752102289	9.481	2	IWB836|IWB28621
H612	4	753965758	753987409	21.652	3	IWB36825|IWB30763|IWB23479
H613	4	754349336	754455115	105.78	5	IWB12358|IWB43502|IWB9045|IWB12196|IWB73906
H614	4	755776286	755930447	154.162	7	IWB54406|IWB35540|IWB72840|IWB11978|IWB13459|IWA8036|IWB59980
H615	4	757942824	757948288	5.465	6	IWB3216|IWB26593|IWB55230|IWB26001|IWB55113|IWB27309
H616	4	758396191	758396872	0.682	3	IWB29388|IWB39958|IWB26483
H617	4	758397669	758399181	1.513	2	IWB61340|IWB35139
H618	4	758420365	758421302	0.938	5	IWB72298|IWB72300|IWB72299|IWB34766|IWB6431
H619	4	758553965	758554565	0.601	2	IWB73785|IWB23494
H620	4	758923165	758927777	4.613	4	IWB67649|IWB67648|IWB72117|IWB72116
H621	4	759829924	759833694	3.771	5	IWB72264|IWB72263|IWB72262|IWB55863|IWB43152
H622	4	760564912	760569195	4.284	5	IWB12001|IWB34990|IWB35144|IWB71057|IWB71056
H623	4	762285381	762289810	4.43	3	IWB55989|IWB54103|IWB46027
H624	4	762622341	762623582	1.242	2	IWB22180|IWB58695
H625	4	764322469	764323372	0.904	3	IWB64724|IWB64723|IWB50384
H626	4	771513398	771513889	0.492	2	IWB64957|IWB36702
H627	4	778722910	778921927	199.018	5	IWB4380|IWB5752|IWB6393|IWB31448|IWB31036
H628	4	779646004	779818555	172.552	4	IWB74253|IWB58750|IWB11535|IWB72114
H629	4	779820179	779881967	61.789	4	IWA318|IWB26131|IWB42411|IWB57098
H630	4	780714629	780714899	0.271	3	IWB34944|IWB73637|IWB28098
H631	5	1251392	1270769	19.378	2	IWB56084|IWB32315
H632	5	1315018	1331325	16.308	2	IWA7656|IWB50940
H633	5	4989820	4990473	0.654	2	IWB49446|IWB62754
H634	5	5158819	5159928	1.11	2	IWB54123|IWA8221
H635	5	5188368	5188368	0.001	2	IWB28588|IWB67532
H636	5	5238591	5238799	0.209	3	IWB65460|IWA1239|IWB14239
H637	5	6210207	6338731	128.525	15	IWB50555|IWB59946|IWB26054|IWB62012|IWB13920|IWB22938|IWB22939|IWB57039|IWB74530|IWB58693|IWB32486|IWB12578|IWA7633|IWB51150|IWB20867
H638	5	6712681	6712818	0.138	4	IWB26615|IWB26313|IWB26616|IWB35642
H639	5	7429496	7443104	13.609	11	IWB24835|IWB24834|IWB58123|IWB24457|IWB45336|IWB7821|IWB8754|IWB47038|IWB11320|IWB49336|IWB11321
H640	5	7944092	7944691	0.6	3	IWB43942|IWB36295|IWB55615
H641	5	7991987	7999850	7.864	2	IWB63105|IWB27166
H642	5	8066849	8066849	0.001	2	IWB28928|IWB28929
H643	5	9730866	9739714	8.849	3	IWB44632|IWB44633|IWB44630
H644	5	10781756	10784096	2.341	2	IWB12069|IWB12070
H645	5	11289184	11390825	101.642	5	IWB40673|IWB55737|IWB4294|IWB3937|IWB4295
H646	5	13758021	13767859	9.839	3	IWB10931|IWB10930|IWB10853
H647	5	17388812	17456965	68.154	4	IWB73885|IWB62546|IWB7674|IWB9583
H648	5	17564595	17572503	7.909	4	IWB26388|IWB59719|IWB46573|IWB12617
H649	5	17781653	17787241	5.589	5	IWB24938|IWB48865|IWB23330|IWB62118|IWB43468
H650	5	18939270	18941574	2.305	2	IWB22424|IWB29704
H651	5	22138559	22138820	0.262	2	IWB68360|IWB68361
H652	5	22317811	22317975	0.165	2	IWB2494|IWB35430
H653	5	22318435	22320101	1.667	2	IWB65061|IWB65062
H654	5	22788869	22789280	0.412	3	IWB29455|IWB29454|IWB9027
H655	5	23525382	23525545	0.164	2	IWB12842|IWA746
H656	5	24100565	24100635	0.071	2	IWB32400|IWB32399
H657	5	25021022	25021876	0.855	3	IWB35090|IWB47095|IWB39756
H658	5	26297693	26298133	0.441	2	IWB45061|IWB61608
H659	5	26581508	26581988	0.481	3	IWB9434|IWB9433|IWB24177
H660	5	28366609	28367745	1.137	3	IWB72990|IWA8124|IWA8152
H661	5	29032295	29032719	0.425	3	IWA2274|IWB22739|IWA7106
H662	5	29038416	29156101	117.686	5	IWA2112|IWB23347|IWB23348|IWB10562|IWB48989
H663	5	29991110	29993230	2.121	4	IWB24576|IWB12154|IWB26791|IWB26792
H664	5	30466001	30498098	32.098	4	IWB22874|IWB64873|IWB72371|IWB72372
H665	5	31518428	31530924	12.497	4	IWB48531|IWB48530|IWB48533|IWB45069
H666	5	33839671	33841412	1.742	2	IWB2316|IWB2315
H667	5	35367457	35368276	0.82	3	IWB25518|IWB57167|IWB62186
H668	5	39736361	39736416	0.056	2	IWB27123|IWB27122
H669	5	41144341	41153149	8.809	5	IWB6528|IWB54163|IWB56597|IWB54162|IWB8668
H670	5	41154634	41155140	0.507	4	IWB70931|IWB70929|IWB70928|IWB70927
H671	5	42147595	42281620	134.026	6	IWB47068|IWA3838|IWB4233|IWB12436|IWB10975|IWB10974
H672	5	42795563	42953588	158.026	7	IWB10149|IWB43101|IWB54956|IWB10586|IWB43776|IWB43775|IWB48927
H673	5	44191044	44360793	169.75	8	IWB3720|IWB4956|IWB14167|IWB20454|IWB1586|IWB5530|IWB37539|IWA889
H674	5	44405003	44426873	21.871	3	IWB7336|IWB11823|IWB63153
H675	5	45681072	45794014	112.943	4	IWB42859|IWB21110|IWB55258|IWB27391
H676	5	46088420	46115251	26.832	4	IWB8063|IWB43573|IWB67043|IWB24406
H677	5	46123798	46124953	1.156	2	IWA1992|IWA4251
H678	5	46880080	46894087	14.008	3	IWB32471|IWB32470|IWB7053
H679	5	47181315	47181449	0.135	3	IWB54529|IWB54530|IWB54531
H680	5	47426989	47427904	0.916	3	IWB8280|IWB34527|IWB19719
H681	5	52670041	52701829	31.789	4	IWB6117|IWB34673|IWB44675|IWB11939
H682	5	56784909	56785726	0.818	2	IWB43273|IWB70422
H683	5	58324615	58325058	0.444	2	IWB35644|IWB72380
H684	5	65097688	65114260	16.573	11	IWB67561|IWB10193|IWB55936|IWB55935|IWB21618|IWB43637|IWB59624|IWB72841|IWB72844|IWB72843|IWB72842
H685	5	65317142	65463970	146.829	5	IWB3605|IWB3606|IWB56962|IWB56961|IWB28342
H686	5	66543478	66544201	0.724	3	IWB82|IWB69397|IWB256
H687	5	68363484	68365389	1.906	3	IWB39654|IWB39653|IWB49277
H688	5	69014963	69015103	0.141	2	IWB61861|IWB61862
H689	5	72575780	72610601	34.822	5	IWB55711|IWB55384|IWA8083|IWB36310|IWB6159
H690	5	72814796	72815689	0.894	3	IWB43156|IWB21742|IWB3418
H691	5	75609680	75694962	85.283	4	IWA6943|IWB43682|IWB13632|IWB13631
H692	5	76817050	76929509	112.46	8	IWB45339|IWB23422|IWB45338|IWB45337|IWB36769|IWB41771|IWB74618|IWB60907
H693	5	77170064	77290925	120.862	10	IWB73263|IWB29747|IWB69854|IWB69853|IWB69852|IWB58259|IWB40861|IWB35421|IWB73250|IWB73251
H694	5	77781733	77783224	1.492	2	IWB28586|IWB28589
H695	5	89305650	89497519	191.87	6	IWB63381|IWB43195|IWB45402|IWB46988|IWB7072|IWB10022
H696	5	91837747	91837847	0.101	3	IWB71775|IWB36919|IWB31002
H697	5	97188852	97189864	1.013	2	IWB10024|IWB70147
H698	5	97441890	97442081	0.192	2	IWB2338|IWB13691
H699	5	98360620	98365707	5.088	2	IWB60422|IWB72685
H700	5	99756560	99773006	16.447	4	IWB8332|IWB74841|IWB54201|IWB7738
H701	5	100095094	100102610	7.517	4	IWB68550|IWB3116|IWB24889|IWB28282
H702	5	101235468	101236701	1.234	3	IWB47215|IWB26402|IWB26401
H703	5	102977052	102977649	0.598	2	IWB56798|IWA4135
H704	5	104062866	104237463	174.598	8	IWB72913|IWB72915|IWB72916|IWB24312|IWB30853|IWB73496|IWB11072|IWB73495
H705	5	104240039	104245444	5.406	4	IWB53367|IWB47284|IWB22995|IWB45999
H706	5	105696246	105696621	0.376	3	IWB58252|IWB12514|IWB12537
H707	5	105909294	105913070	3.777	6	IWB73598|IWB47379|IWB47380|IWB45825|IWB73543|IWB45822
H708	5	110479942	110481490	1.549	3	IWB26247|IWB55365|IWB23788
H709	5	118287002	118287604	0.603	2	IWB39369|IWB39370
H710	5	121357831	121371110	13.28	8	IWB49035|IWB35350|IWB4951|IWB53857|IWA762|IWB5826|IWA763|IWB7111
H711	5	122265649	122267605	1.957	5	IWB42880|IWB37019|IWB38875|IWB42879|IWB6599
H712	5	126731331	126731379	0.049	2	IWB6607|IWB34697
H713	5	131570211	131570239	0.029	2	IWB32422|IWB32421
H714	5	132581584	132581611	0.028	2	IWB19714|IWB61133
H715	5	133009154	133169493	160.34	4	IWB38861|IWB58034|IWB40383|IWB37419
H716	5	134090204	134090399	0.196	4	IWB36153|IWB73921|IWB1602|IWB52416
H717	5	134995944	135100801	104.858	7	IWB22236|IWB32006|IWB32007|IWB22202|IWB11568|IWB60585|IWB50813
H718	5	135692369	135693099	0.731	2	IWB3522|IWB32009
H719	5	136150916	136175543	24.628	3	IWB22257|IWB29853|IWB53910
H720	5	136430367	136430718	0.352	3	IWB36599|IWB36600|IWB74034
H721	5	139802211	139812734	10.524	3	IWB56098|IWB47512|IWB62112
H722	5	140764619	140850028	85.41	13	IWB1575|IWB45082|IWB60825|IWB53499|IWB46325|IWB7334|IWB12056|IWB44515|IWB47399|IWB22853|IWB44975|IWB7335|IWB12063
H723	5	144431499	144432999	1.501	2	IWB35283|IWB33921
H724	5	146661271	146736270	75	7	IWA1204|IWB26224|IWB48352|IWB48351|IWB51418|IWB51419|IWB55126
H725	5	151908066	151908146	0.081	2	IWB53255|IWB29827
H726	5	152569030	152569632	0.603	2	IWB4196|IWB72906
H727	5	154250818	154270931	20.114	4	IWB33109|IWB47487|IWB73913|IWB22630
H728	5	159205808	159207368	1.561	4	IWB35747|IWB32441|IWB32439|IWB30179
H729	5	160201152	160217139	15.988	2	IWB10669|IWB40021
H730	5	164938789	165117945	179.157	5	IWB74209|IWB7833|IWA905|IWB35887|IWB9332
H731	5	179398214	179398957	0.744	2	IWB26859|IWB54789
H732	5	180543274	180568955	25.682	3	IWB3996|IWB8270|IWB6357
H733	5	183315504	183315552	0.049	2	IWB13596|IWB35916
H734	5	185760795	185761524	0.73	2	IWB39509|IWB48313
H735	5	188257015	188257900	0.886	2	IWB52134|IWB38494
H736	5	189603633	189745314	141.682	6	IWB7968|IWB20601|IWB29808|IWA7951|IWB58207|IWB26221
H737	5	200902702	200904920	2.219	2	IWB59913|IWB57218
H738	5	202740078	202740621	0.544	2	IWB22675|IWB22676
H739	5	206113266	206117301	4.036	3	IWB58691|IWA5724|IWB49874
H740	5	209097051	209099577	2.527	3	IWA169|IWA170|IWB1292
H741	5	210455849	210652296	196.448	7	IWB9584|IWA776|IWB14712|IWA777|IWA1130|IWB14833|IWA1237
H742	5	216459753	216467869	8.117	4	IWB49755|IWB49756|IWB72081|IWB7961
H743	5	233167541	233269124	101.584	6	IWB55297|IWB9834|IWB36415|IWB5185|IWB72239|IWB12818
H744	5	234634246	234636844	2.599	5	IWB56541|IWB56542|IWB46638|IWB4009|IWB4008
H745	5	239846746	239854081	7.336	3	IWB8835|IWB8834|IWB42648
H746	5	246067540	246067724	0.185	2	IWB54733|IWB36200
H747	5	249198797	249374753	175.957	5	IWB10611|IWB28408|IWB22665|IWB59321|IWB59632
H748	5	258030666	258030828	0.163	3	IWB32128|IWB32130|IWB32131
H749	5	294201137	294201759	0.623	2	IWB9234|IWB9522
H750	5	316706178	316706446	0.269	2	IWA4759|IWA4757
H751	5	316743977	316746770	2.794	3	IWB24069|IWB43448|IWB24887
H752	5	384668042	384670466	2.425	3	IWA7252|IWA7253|IWB47471
H753	5	403693190	403700706	7.517	7	IWA1056|IWB14854|IWB44851|IWA7376|IWA4140|IWB48583|IWA7959
H754	5	408072955	408073370	0.416	2	IWA3107|IWA1737
H755	5	409338353	409344556	6.204	3	IWB34695|IWB27010|IWB5084
H756	5	412663691	412665461	1.771	3	IWB57571|IWB57575|IWB21312
H757	5	413865566	413865937	0.372	5	IWA5259|IWB21075|IWB21076|IWB43065|IWB43068
H758	5	413866200	413866618	0.419	3	IWB21074|IWB43066|IWA5263
H759	5	422731987	422732134	0.148	3	IWB46657|IWB45224|IWB45225
H760	5	423661828	423837999	176.172	5	IWB30548|IWA7146|IWA8454|IWA7420|IWA7499
H761	5	429140546	429261195	120.65	4	IWB71012|IWB40487|IWA7524|IWB2877
H762	5	436944938	437009707	64.77	4	IWB2128|IWB50075|IWB45966|IWB38428
H763	5	442519763	442569587	49.825	6	IWA7103|IWB30769|IWB34687|IWB49222|IWB951|IWB952
H764	5	442791288	442796096	4.809	9	IWA3153|IWB74650|IWB55149|IWB55148|IWB13486|IWB13487|IWB50490|IWB61820|IWB50491
H765	5	450181285	450184371	3.087	3	IWB56465|IWB42378|IWA2972
H766	5	456052443	456176969	124.527	5	IWB46528|IWB30844|IWB62651|IWA7195|IWB29666
H767	5	462887358	462947321	59.964	4	IWA4541|IWB3118|IWB46692|IWB60325
H768	5	502386515	502402677	16.163	2	IWA3069|IWA7011
H769	5	529102634	529262870	160.237	4	IWB21339|IWB39706|IWB52801|IWB59315
H770	5	532090620	532092738	2.119	3	IWB62728|IWB41508|IWB41506
H771	5	539961970	539965301	3.332	3	IWB24879|IWB44417|IWB44418
H772	5	546201974	546203236	1.263	6	IWB6280|IWB6296|IWB50897|IWB36203|IWB36165|IWB56373
H773	5	553613870	553623424	9.555	3	IWB34502|IWB32330|IWB64779
H774	5	556200441	556204776	4.336	3	IWB70437|IWB42744|IWB42006
H775	5	559427964	559430434	2.471	3	IWB63896|IWB63900|IWB63897
H776	5	564233172	564234622	1.451	3	IWB46098|IWB54088|IWB68043
H777	5	564874491	564877324	2.834	2	IWB35658|IWB12137
H778	5	581869248	581869580	0.333	2	IWA482|IWA483
H779	5	592584090	592585198	1.109	3	IWB35013|IWB35303|IWB6667
H780	5	595126555	595126879	0.325	3	IWB11849|IWB7263|IWB11848
H781	5	604997322	605001417	4.096	3	IWB62437|IWB11808|IWB49567
H782	5	612684619	612686336	1.718	2	IWB55736|IWB53902
H783	5	616955915	617142865	186.951	20	IWB23356|IWB60039|IWB28487|IWB47244|IWB28486|IWB70826|IWB25132|IWB53595|IWB21140|IWA5512|IWB32056|IWB49862|IWB49783|IWB62675|IWB47243|IWB30854|IWB27165|IWB48279|IWB48280|IWB21199
H784	5	635023634	635206971	183.338	6	IWB6524|IWB10507|IWB11345|IWB39865|IWB73198|IWB73199
H785	5	637464058	637574500	110.443	8	IWB6859|IWB11563|IWB1288|IWB64321|IWB72411|IWB64322|IWB72408|IWB72407
H786	5	640103046	640104205	1.16	4	IWB14419|IWB14420|IWB42398|IWB32428
H787	5	643682900	643685116	2.217	7	IWB48486|IWB48481|IWB63172|IWB48482|IWB48483|IWB21477|IWB21476
H788	5	644147029	644151605	4.577	3	IWB28694|IWB28695|IWB41234
H789	5	647105352	647109458	4.107	4	IWB32027|IWB32028|IWB52433|IWB70548
H790	5	651357998	651358829	0.832	3	IWB66493|IWB66494|IWB72164
H791	5	651932324	651932583	0.26	4	IWB67609|IWB47224|IWB67608|IWB67607
H792	5	652613113	652615009	1.897	2	IWB73241|IWB8717
H793	5	655007208	655014378	7.171	2	IWB62876|IWB12242
H794	5	655602812	655607047	4.236	3	IWB25842|IWB25841|IWB28851
H795	5	657790778	657845069	54.292	4	IWB35393|IWB47694|IWB32487|IWB35244
H796	5	660114513	660123837	9.325	2	IWB11045|IWB41820
H797	5	664132159	664219887	87.729	8	IWB30332|IWB49572|IWB73114|IWB12045|IWB45933|IWB6433|IWB6031|IWB48659
H798	5	666482850	666649974	167.125	5	IWB73343|IWB13870|IWB44075|IWB64882|IWB5492
H799	5	669436208	669440743	4.536	4	IWA7850|IWB11159|IWB2373|IWB41975
H800	5	670750861	670837387	86.527	5	IWB28478|IWB28479|IWB11868|IWB21661|IWB7131
H801	5	675340541	675345817	5.277	2	IWB68759|IWB28337
H802	5	679898801	679899645	0.845	2	IWB23831|IWB45055
H803	5	680573556	680576401	2.846	2	IWB7226|IWB31015
H804	5	681539573	681543292	3.72	7	IWB62478|IWB28799|IWB28798|IWB56161|IWB56162|IWB36307|IWB41882
H805	5	682848300	682848554	0.255	2	IWB1190|IWB1188
H806	5	683003143	683043372	40.23	8	IWB32177|IWB32178|IWB1631|IWB7138|IWB6631|IWB34949|IWB37190|IWB1801
H807	5	690028498	690033328	4.831	3	IWB32106|IWB22170|IWB7438
H808	5	691780816	691780964	0.149	2	IWB35200|IWB36270
H809	5	692461127	692468949	7.823	5	IWB21524|IWA6122|IWB64008|IWB43935|IWB43934
H810	5	693314984	693315277	0.294	2	IWB46242|IWB60406
H811	5	694050158	694051030	0.873	2	IWB56896|IWB28722
H812	5	694055722	694056368	0.647	3	IWB73960|IWB73961|IWB64246
H813	5	695580691	695581305	0.615	2	IWB26742|IWB28363
H814	5	696372884	696375200	2.317	4	IWB54020|IWB33483|IWB32070|IWB42424
H815	5	696677227	696678842	1.616	5	IWA4095|IWB11780|IWA4096|IWA4097|IWB54476
H816	5	697510323	697512054	1.732	3	IWB8419|IWB8420|IWB25695
H817	5	698208660	698214283	5.624	2	IWB6732|IWB53524
H818	5	698303784	698304234	0.451	2	IWB52991|IWB52992
H819	5	698963733	699109302	145.57	10	IWB24676|IWB24675|IWB3588|IWB47959|IWB1888|IWB42807|IWB58060|IWB58059|IWB58061|IWB54945
H820	5	709701422	709701846	0.425	3	IWA5216|IWA5215|IWA5214
H821	5	712601474	712603539	2.066	2	IWB67764|IWB67759
H822	5	713675217	713675990	0.774	6	IWB2943|IWB74201|IWB28963|IWB6785|IWB28961|IWB28962
H823	5	714779819	714785285	5.467	3	IWB8450|IWB8449|IWB67250
H824	5	715599457	715601519	2.063	2	IWB2594|IWB2286
H825	5	719800866	719802597	1.732	3	IWB70765|IWB70768|IWB73071
H826	5	720479438	720480388	0.951	3	IWB41607|IWB72837|IWA7955
H827	5	720576408	720581207	4.8	2	IWB66401|IWB75181
H828	5	721278237	721278282	0.046	2	IWB58943|IWB34747
H829	5	721922278	722093257	170.98	4	IWB9044|IWB27775|IWB34377|IWB12973
H830	5	723333580	723334055	0.476	3	IWB19785|IWB19787|IWB19788
H831	5	725963092	725963376	0.285	3	IWB4941|IWB4853|IWB4852
H832	5	726547564	726547835	0.272	4	IWB45099|IWB72535|IWB45098|IWB7207
H833	5	730188244	730188509	0.266	2	IWB49827|IWB49828
H834	5	730189030	730191832	2.803	6	IWB69430|IWB49829|IWB69431|IWB68123|IWB36706|IWB7223
H835	5	730563070	730565477	2.408	2	IWB5957|IWB42671
H836	5	730851182	731001770	150.589	8	IWB42842|IWB1068|IWB11460|IWB6613|IWB34537|IWA1076|IWB13992|IWB74915
H837	5	731305769	731481845	176.077	5	IWB58912|IWB31521|IWA8145|IWB11239|IWB9514
H838	5	731609208	731609635	0.428	3	IWB42959|IWB13650|IWB2761
H839	5	731894215	731895498	1.284	5	IWB4149|IWB4157|IWB56777|IWB4154|IWB8139
H840	5	734720779	734720879	0.101	2	IWB74179|IWB73057
H841	5	736243823	736245708	1.886	3	IWB4580|IWB4581|IWB2538
H842	5	740802332	740804480	2.149	2	IWB786|IWB25075
H843	5	742466712	742473061	6.35	3	IWB22201|IWB45481|IWB4594
H844	5	743738897	743746556	7.66	11	IWA8449|IWB57664|IWA8534|IWB25868|IWB25869|IWB30596|IWB69631|IWB69630|IWB69629|IWB69628|IWB23660
H845	5	746037411	746101779	64.369	5	IWB60041|IWB43411|IWB4273|IWB73784|IWB4272
H846	5	748973807	748985732	11.926	4	IWB51349|IWB23232|IWB57313|IWB14677
H847	5	751261462	751262469	1.008	3	IWA7112|IWA7113|IWB39525
H848	5	752787416	752787897	0.482	2	IWB64535|IWB13494
H849	5	754651145	754665953	14.809	3	IWB68091|IWA8293|IWB32437
H850	5	758592668	758596976	4.309	5	IWB64472|IWB47343|IWB31663|IWB31944|IWB3773
H851	5	760883554	760890623	7.07	3	IWB54178|IWB14076|IWB13902
H852	5	760930937	760951191	20.255	11	IWB3249|IWB47591|IWB71976|IWB32481|IWB71975|IWB29592|IWB29591|IWB29590|IWB29589|IWB29593|IWB59438
H853	5	762503315	762519022	15.708	3	IWB22835|IWB14219|IWB55766
H854	5	763630872	763633120	2.249	3	IWB21638|IWB120|IWB11366
H855	5	764074052	764074107	0.056	2	IWB11101|IWB36286
H856	5	764822911	764822952	0.042	2	IWB40742|IWB42430
H857	5	766233839	766234416	0.578	3	IWB61238|IWB44344|IWB44343
H858	5	767016323	767176615	160.293	13	IWB54212|IWB28564|IWB28565|IWB28561|IWB28562|IWB43464|IWB13249|IWB64461|IWB64462|IWB64463|IWB8607|IWB55346|IWB2628
H859	5	770679158	770760345	81.188	4	IWB24545|IWB46560|IWB40501|IWB24886
H860	5	773142093	773144888	2.796	3	IWB20875|IWB47253|IWB45108
H861	5	773146925	773346012	199.088	9	IWB45109|IWB27625|IWB45110|IWB28596|IWB60546|IWB60545|IWB60544|IWB26356|IWB57003
H862	5	774948762	774958149	9.388	2	IWB40514|IWB27473
H863	5	775336370	775337443	1.074	2	IWB5439|IWB9919
H864	5	779341223	779345769	4.547	6	IWB66207|IWB32211|IWB4319|IWB72277|IWB4318|IWB34399
H865	5	780590276	780590397	0.122	2	IWB428|IWB429
H866	5	782534286	782534710	0.425	4	IWB21105|IWB41547|IWB62498|IWB62759
H867	5	782961318	782975786	14.469	2	IWB73565|IWB45863
H868	5	783226928	783227468	0.541	3	IWB7106|IWB35566|IWB36136
H869	5	786033259	786230553	197.295	8	IWB11987|IWB1354|IWB54392|IWB13959|IWB24905|IWB53581|IWB27274|IWA4118
H870	5	788524776	788656724	131.949	4	IWB12117|IWB12118|IWB22135|IWB22131
H871	5	788657019	788658824	1.806	2	IWA8018|IWB34450
H872	5	788661564	788664700	3.137	2	IWB32375|IWA3206
H873	5	789950123	789965388	15.266	2	IWB3396|IWB13362
H874	5	790752085	790755037	2.953	3	IWB65020|IWB30167|IWB30169
H875	5	793129934	793130055	0.122	2	IWB12290|IWB12291
H876	5	796802048	796808287	6.24	5	IWB12598|IWB54766|IWB48200|IWB48199|IWB54767
H877	5	801217304	801220429	3.126	4	IWB30221|IWB50358|IWB23909|IWB28681
H878	6	274994	275321	0.328	3	IWB992|IWB66352|IWB66351
H879	6	675258	678909	3.652	2	IWB28900|IWB35447
H880	6	2470497	2478495	7.999	3	IWB42101|IWB32200|IWB67301
H881	6	5234376	5235827	1.452	3	IWB29772|IWB56957|IWB28040
H882	6	5382812	5383250	0.439	2	IWB65445|IWB65727
H883	6	7152254	7168851	16.598	4	IWB47276|IWB47277|IWB58705|IWB45671
H884	6	9826098	9826644	0.547	2	IWB42391|IWB65788
H885	6	9854567	9855381	0.815	2	IWB66090|IWB63953
H886	6	9885479	9888404	2.926	2	IWB66021|IWB67744
H887	6	11843337	11850852	7.516	2	IWB72027|IWB26871
H888	6	12331926	12332007	0.082	2	IWB32230|IWB32229
H889	6	12688924	12689419	0.496	4	IWB65191|IWB65424|IWB6548|IWB3066
H890	6	13074979	13074979	0.001	2	IWA5501|IWA5502
H891	6	14259489	14261151	1.663	2	IWB55049|IWB3853
H892	6	14414703	14423539	8.837	2	IWB42132|IWB7748
H893	6	14778789	14899502	120.714	4	IWA1107|IWB15804|IWB10124|IWB10460
H894	6	17347196	17347297	0.102	2	IWB45796|IWB15795
H895	6	18232191	18232634	0.444	2	IWB5912|IWB22363
H896	6	20768670	20769304	0.635	2	IWB49600|IWB37711
H897	6	20769481	20770088	0.608	3	IWB19867|IWB19868|IWB50861
H898	6	25645836	25653535	7.7	6	IWB70921|IWB70924|IWB70926|IWB70930|IWB70932|IWB70934
H899	6	28731478	28732588	1.111	3	IWB67044|IWB23421|IWB23418
H900	6	29166312	29167029	0.718	3	IWB44250|IWB4418|IWB6164
H901	6	49881771	49882594	0.824	3	IWB31983|IWB31982|IWB40862
H902	6	56583877	56583911	0.035	2	IWB45731|IWB47481
H903	6	62400536	62401992	1.457	3	IWB49119|IWB918|IWB917
H904	6	63555645	63574260	18.616	3	IWB16499|IWB51389|IWB19256
H905	6	64190307	64191393	1.087	2	IWB25893|IWB74265
H906	6	67225699	67231262	5.564	3	IWB45998|IWB40266|IWB40267
H907	6	67966851	67967477	0.627	2	IWB39648|IWB49647
H908	6	69504659	69505193	0.535	3	IWB7882|IWB45821|IWB45824
H909	6	71761134	71767150	6.017	2	IWB44900|IWB24243
H910	6	74981531	75001945	20.415	3	IWB8161|IWB8162|IWB46794
H911	6	75097116	75259827	162.712	5	IWB47073|IWB22642|IWB22968|IWB61830|IWB7794
H912	6	75389775	75504532	114.758	6	IWB35753|IWB50095|IWB4076|IWB23879|IWB23988|IWB53948
H913	6	78331411	78334652	3.242	2	IWA2006|IWA293
H914	6	78379803	78562289	182.487	5	IWB9022|IWB32482|IWB11266|IWB11267|IWB62848
H915	6	79877762	79987796	110.035	8	IWB32187|IWB8439|IWB49865|IWB50081|IWB62940|IWB59535|IWB12871|IWB43312
H916	6	81299027	81310948	11.922	3	IWB46011|IWB58201|IWB6863
H917	6	81311088	81327540	16.453	2	IWB32459|IWB11304
H918	6	81836790	81969375	132.586	4	IWB7477|IWB12417|IWB9680|IWB26157
H919	6	83134967	83161829	26.863	3	IWB46748|IWB35998|IWB65168
H920	6	134792724	134793423	0.7	2	IWB50296|IWB15774
H921	6	157132854	157138542	5.689	2	IWB32222|IWB9611
H922	6	458734326	458735308	0.983	4	IWB62252|IWB31351|IWB50665|IWB31352
H923	6	523162630	523162732	0.103	2	IWB40823|IWB48278
H924	6	545403104	545403288	0.185	2	IWA4829|IWA6895
H925	6	561836217	561840997	4.781	2	IWB63053|IWB42038
H926	6	570949974	570953850	3.877	3	IWB52452|IWB62145|IWB56495
H927	6	570954350	571058994	104.645	8	IWA7840|IWB64821|IWA7839|IWB57133|IWB42352|IWB54647|IWB48260|IWB44808
H928	6	571077641	571194990	117.35	9	IWB60670|IWB26189|IWA8205|IWB4650|IWB63111|IWB63109|IWB29432|IWB30715|IWB3126
H929	6	572074690	572081240	6.551	5	IWB63236|IWB2983|IWB2986|IWB2987|IWB2988
H930	6	574108989	574110273	1.285	5	IWB12659|IWA8149|IWA1083|IWB30828|IWB40995
H931	6	574351399	574387174	35.776	5	IWB53237|IWB53239|IWB29964|IWB44589|IWB57920
H932	6	577151490	577153336	1.847	3	IWB53772|IWB32378|IWB64249
H933	6	579193552	579203940	10.389	5	IWB56738|IWB56739|IWB56740|IWB14316|IWB29147
H934	6	580194647	580194767	0.121	2	IWB60317|IWB48926
H935	6	580240446	580387088	146.643	5	IWB1735|IWB62570|IWB62569|IWB62567|IWB62566
H936	6	590071515	590240775	169.261	4	IWB3552|IWB46153|IWB63709|IWB62839
H937	6	590241184	590242215	1.032	2	IWB43586|IWB2122
H938	6	591022163	591031271	9.109	2	IWB2397|IWB22791
H939	6	594546655	594547762	1.108	4	IWB32718|IWB32719|IWB43228|IWB48051
H940	6	595437913	595439861	1.949	3	IWB22617|IWB44351|IWB12112
H941	6	596911771	596915122	3.352	6	IWB2184|IWA7762|IWB24956|IWB64844|IWB26898|IWB1364
H942	6	598639766	598717775	78.01	4	IWB48503|IWB50263|IWB32284|IWB21811
H943	6	600295908	600344171	48.264	4	IWB31363|IWB41253|IWB24750|IWB5042
H944	6	601184053	601184292	0.24	3	IWB26659|IWB50210|IWB28215
H945	6	601600717	601601882	1.166	3	IWB55232|IWB13626|IWB63760
H946	6	602513221	602513759	0.539	3	IWB23938|IWB23937|IWB23936
H947	6	607418780	607422518	3.739	2	IWB50073|IWB43946
H948	6	607422921	607423370	0.45	3	IWB43944|IWB564|IWB43945
H949	6	608755471	608755654	0.184	2	IWB62525|IWB23121
H950	6	608756019	608918908	162.89	7	IWB4530|IWB11448|IWB5531|IWB53992|IWB53993|IWB54943|IWB74078
H951	6	609423196	609433778	10.583	2	IWB57543|IWB58747
H952	6	610277018	610289355	12.338	4	IWB29194|IWB29193|IWB29195|IWB43148
H953	6	611159755	611222948	63.194	5	IWB48605|IWB54533|IWB54532|IWB34032|IWB15727
H954	6	612342779	612343088	0.31	2	IWB22453|IWB22452
H955	6	616071735	616151982	80.248	5	IWB11478|IWB12527|IWB12528|IWB11278|IWB11279
H956	6	616504158	616570458	66.301	5	IWB30908|IWB27430|IWB7831|IWB28991|IWB53176
H957	6	618149755	618152427	2.673	5	IWB56539|IWB11995|IWB56540|IWB32436|IWB32438
H958	6	620323014	620323473	0.46	3	IWB20847|IWB57370|IWB41686
H959	6	621845088	621965467	120.38	5	IWB32416|IWB32417|IWB56627|IWB36334|IWB23797
H960	6	628900852	628941024	40.173	5	IWB46702|IWB25211|IWB28458|IWB20572|IWB22893
H961	6	629203279	629207747	4.469	3	IWB29338|IWB6233|IWB28221
H962	6	634296734	634473571	176.838	5	IWB22773|IWB32878|IWB57055|IWB57054|IWB61791
H963	6	637652825	637653359	0.535	2	IWB6563|IWB6444
H964	6	638133955	638141053	7.099	2	IWB25706|IWB58635
H965	6	640214194	640214363	0.17	3	IWB23907|IWB23908|IWB23910
H966	6	645710419	645723130	12.712	4	IWB30367|IWB61325|IWB51817|IWB56667
H967	6	647968482	647970425	1.944	3	IWB58393|IWB35758|IWB35594
H968	6	648112803	648284561	171.759	6	IWB58447|IWB58446|IWB58448|IWB28422|IWB64107|IWB64108
H969	6	650322047	650326751	4.705	2	IWB14645|IWB30882
H970	6	650326881	650328010	1.13	3	IWB21124|IWB59477|IWB27273
H971	6	670440915	670441738	0.824	2	IWA4615|IWA2087
H972	6	715029998	715031553	1.556	2	IWA2873|IWA6561
H973	7	3388539	3388539	0.001	2	IWB30442|IWB41434
H974	7	3406679	3406679	0.001	2	IWB54335|IWB65712
H975	7	4342214	4342214	0.001	2	IWB2309|IWB27647
H976	7	4342214	4352727	10.514	2	IWB27648|IWB72768
H977	7	7432798	7437103	4.306	2	IWB7659|IWB11852
H978	7	7782398	7951473	169.076	7	IWB8091|IWB43584|IWB29214|IWB30301|IWB7093|IWB11224|IWB23358
H979	7	8593487	8686667	93.181	5	IWB75017|IWB75018|IWB50475|IWB42852|IWB60283
H980	7	9613464	9613572	0.109	2	IWB40592|IWB20002
H981	7	9845674	9855065	9.392	4	IWB21616|IWB57220|IWB11361|IWB21495
H982	7	10300806	10305204	4.399	4	IWB49843|IWB52610|IWB49840|IWB22164
H983	7	11350778	11350941	0.164	2	IWB35638|IWB4766
H984	7	11941162	11941936	0.775	4	IWB7261|IWB3850|IWB1637|IWB11846
H985	7	12234045	12253753	19.709	3	IWB60480|IWB8501|IWB8502
H986	7	12781130	12980739	199.61	10	IWA7861|IWB401|IWB12968|IWB11377|IWB7003|IWB12606|IWB7037|IWB61740|IWB38607|IWB38606
H987	7	13029150	13035902	6.753	2	IWB10546|IWB11588
H988	7	13037841	13037877	0.037	2	IWB60531|IWB60530
H989	7	13405069	13500849	95.781	4	IWB12225|IWB1704|IWB60693|IWB50683
H990	7	13739562	13909276	169.715	4	IWB1930|IWB50434|IWB44955|IWB28726
H991	7	14040281	14047747	7.467	4	IWB32797|IWB12170|IWB35251|IWB21620
H992	7	14849875	14851151	1.277	4	IWB48009|IWB21899|IWB54955|IWB34333
H993	7	15089000	15090035	1.036	3	IWB29389|IWB12993|IWB12994
H994	7	20020858	20037632	16.775	3	IWB35874|IWA851|IWB41712
H995	7	20134479	20329372	194.894	4	IWB50321|IWB45971|IWB41104|IWB41102
H996	7	23651182	23838539	187.358	7	IWA8105|IWB26668|IWA8106|IWB26667|IWB34361|IWB4588|IWB73311
H997	7	24748734	24753098	4.365	4	IWB7237|IWB3644|IWB14876|IWB14875
H998	7	34522062	34524665	2.604	4	IWB45555|IWB26833|IWA7086|IWA7085
H999	7	36921210	36921890	0.681	5	IWB47869|IWB35079|IWB58395|IWB58394|IWB24284
H1000	7	38334267	38391857	57.591	4	IWB73099|IWB25465|IWB44091|IWB44089
H1001	7	42031385	42032262	0.878	3	IWB7165|IWB11450|IWB58235
H1002	7	44630467	44632736	2.27	6	IWB50720|IWB40137|IWB50719|IWB40102|IWB48080|IWB21161
H1003	7	45571335	45598472	27.138	3	IWB3758|IWB32527|IWB38639
H1004	7	51769024	51772919	3.896	4	IWB72638|IWB285|IWB59845|IWB73247
H1005	7	53553834	53572557	18.724	5	IWB15006|IWB44601|IWB41142|IWB40364|IWB47000
H1006	7	53832104	53838379	6.276	3	IWB15056|IWB58107|IWB50280
H1007	7	54879170	55045880	166.711	5	IWB4649|IWB57980|IWB29690|IWB23249|IWB52977
H1008	7	56219889	56399891	180.003	6	IWB24102|IWB24101|IWB6719|IWB11867|IWB6013|IWB63098
H1009	7	56670697	56676264	5.568	5	IWB33874|IWB21527|IWB55686|IWB196|IWB34591
H1010	7	57856067	58045706	189.64	4	IWB59873|IWB6586|IWB69125|IWB9676
H1011	7	61219715	61349009	129.295	7	IWB7969|IWB36760|IWB31551|IWB29885|IWB35234|IWB7130|IWB6837
H1012	7	68285742	68297745	12.004	2	IWB20076|IWA7649
H1013	7	148603663	148603721	0.059	2	IWB68807|IWB68808
H1014	7	179534895	179536259	1.365	2	IWB2211|IWB31829
H1015	7	330053698	330058269	4.572	4	IWB50014|IWA7454|IWB5308|IWB45953
H1016	7	401802022	401803611	1.59	2	IWB28355|IWB62522
H1017	7	430790403	430791436	1.034	3	IWB8105|IWB67279|IWB67278
H1018	7	436464445	436466671	2.227	4	IWB53942|IWB38036|IWB73661|IWA7928
H1019	7	477564201	477708688	144.488	4	IWB45706|IWB12449|IWB8930|IWB6187
H1020	7	477793887	477795306	1.42	3	IWB3287|IWB46450|IWB57548
H1021	7	487438216	487458080	19.865	4	IWB49539|IWA8590|IWB11658|IWB36078
H1022	7	500976955	500994692	17.738	4	IWB21128|IWB40963|IWA7415|IWB48720
H1023	7	507273427	507470038	196.612	4	IWB28341|IWB7692|IWB46437|IWA2154
H1024	7	511074302	511076028	1.727	4	IWB52767|IWB52769|IWB52768|IWB27583
H1025	7	511751362	511755046	3.685	2	IWB50912|IWB10578
H1026	7	513607021	513608285	1.265	3	IWB40077|IWB53805|IWA7319
H1027	7	514110057	514111907	1.851	4	IWB30094|IWB52255|IWB52256|IWB52257
H1028	7	514493932	514625967	132.036	4	IWB72777|IWB74968|IWB34859|IWB2437
H1029	7	517074876	517095239	20.364	9	IWB39059|IWB72687|IWB4611|IWB4612|IWB72686|IWA73|IWB189|IWB73850|IWB65336
H1030	7	517661783	517665061	3.279	5	IWB14015|IWB58989|IWA7476|IWA8061|IWB50023
H1031	7	519083153	519219670	136.518	4	IWB57248|IWB3210|IWB20964|IWB20961
H1032	7	521305671	521308517	2.847	3	IWB62575|IWB36752|IWB36660
H1033	7	523546472	523557507	11.036	5	IWB50071|IWB60253|IWA7355|IWB72560|IWB69595
H1034	7	528592813	528596663	3.851	3	IWB47905|IWA7826|IWB45424
H1035	7	530183158	530197826	14.669	3	IWB54571|IWB62073|IWA8621
H1036	7	532663237	532663284	0.048	2	IWB10893|IWB10892
H1037	7	532934785	533073518	138.734	4	IWB60761|IWB60760|IWB53144|IWA7541
H1038	7	535193769	535323636	129.868	7	IWB9299|IWB8484|IWB1175|IWB70411|IWB11966|IWB7305|IWB2350
H1039	7	536628092	536638267	10.176	4	IWB72763|IWA743|IWB11773|IWB8165
H1040	7	538846656	538847561	0.906	2	IWB30070|IWB30072
H1041	7	543178709	543178859	0.151	3	IWB72652|IWB72653|IWA4075
H1042	7	544380632	544394648	14.017	3	IWB39824|IWB44536|IWB39280
H1043	7	556358893	556552518	193.626	4	IWB55513|IWB52157|IWB34546|IWB26728
H1044	7	557018553	557019636	1.084	2	IWB35184|IWB21475
H1045	7	557409658	557409921	0.264	2	IWB37155|IWB34552
H1046	7	557414930	557421810	6.881	3	IWB12173|IWB7381|IWB14528
H1047	7	557956200	557956366	0.167	3	IWB52004|IWB39823|IWA7441
H1048	7	558886068	558891262	5.195	4	IWB61453|IWB51985|IWB51986|IWB73166
H1049	7	559529571	559532723	3.153	3	IWB6301|IWB38378|IWA7564
H1050	7	560679182	560681363	2.182	6	IWB34362|IWB10468|IWB34963|IWA7970|IWA3600|IWA7891
H1051	7	562284129	562284295	0.167	2	IWB38447|IWB26905
H1052	7	564941569	564944497	2.929	7	IWB54779|IWB54780|IWB56122|IWB64832|IWA1536|IWB21969|IWA7350
H1053	7	565354668	565357103	2.436	2	IWA4110|IWB53673
H1054	7	565773621	565794632	21.012	4	IWB23075|IWB38538|IWB38537|IWB60083
H1055	7	571401618	571407414	5.797	3	IWB42049|IWB52500|IWB70153
H1056	7	572322833	572326672	3.84	2	IWB74032|IWB25350
H1057	7	583993156	583993919	0.764	2	IWA1704|IWA1703
H1058	7	642039436	642160227	120.792	4	IWB65142|IWB72528|IWB7357|IWB12140
H1059	7	642932607	642959283	26.677	7	IWB32613|IWB36057|IWB74060|IWB8136|IWB8137|IWB74059|IWB74058
H1060	7	645995706	645999671	3.966	4	IWB70904|IWB70903|IWB70902|IWB70900
H1061	7	646854726	646855171	0.446	2	IWB71900|IWB71901
H1062	7	648023581	648038911	15.331	4	IWB24151|IWB29860|IWB26794|IWB26793
H1063	7	648859091	648868284	9.194	5	IWB36101|IWB40282|IWB40281|IWB46509|IWB40280
H1064	7	649544608	649545688	1.081	2	IWB7240|IWB19889
H1065	7	649631890	649811130	179.241	6	IWB54238|IWB51209|IWB51210|IWA7695|IWA7696|IWB12423
H1066	7	650008351	650057614	49.264	5	IWB8549|IWB8548|IWB34782|IWB2457|IWB74682
H1067	7	650423746	650427510	3.765	6	IWB26279|IWA7469|IWB39879|IWB39880|IWB49970|IWB52010
H1068	7	653241750	653244688	2.939	5	IWB30876|IWB1203|IWB63092|IWB52074|IWB52072
H1069	7	657945708	657947919	2.212	3	IWB35794|IWB6655|IWB43064
H1070	7	658902767	658905330	2.564	3	IWB35440|IWB35470|IWB1108
H1071	7	658983594	659161977	178.384	5	IWB7801|IWB53846|IWB47989|IWA7324|IWA7169
H1072	7	659397274	659400809	3.536	2	IWB63185|IWB48913
H1073	7	666229575	666242594	13.02	2	IWB60569|IWB11684
H1074	7	671143985	671144027	0.043	2	IWB11347|IWB11348
H1075	7	683440905	683530183	89.279	6	IWB41858|IWB41859|IWB54042|IWB9112|IWB41307|IWB26079
H1076	7	685121083	685122538	1.456	4	IWB51545|IWA855|IWB34379|IWB35016
H1077	7	685357816	685360568	2.753	5	IWA7602|IWB40736|IWB72662|IWB72661|IWB72660
H1078	7	686127775	686151939	24.165	3	IWB7486|IWB20248|IWB29375
H1079	7	686783932	686787361	3.43	8	IWB73101|IWB73102|IWB73103|IWB11581|IWB11580|IWA1551|IWB8010|IWB3798
H1080	7	688617143	688679975	62.833	6	IWB8043|IWB30485|IWA926|IWA799|IWB54057|IWB64637
H1081	7	688883837	688887150	3.314	6	IWB40418|IWB35344|IWB40422|IWB6678|IWB40420|IWB40419
H1082	7	693461747	693487038	25.292	3	IWB20737|IWB38325|IWB25213
H1083	7	695532698	695729871	197.174	4	IWB4110|IWB11738|IWB36105|IWB5927
H1084	7	697390373	697456650	66.278	4	IWB7306|IWB7097|IWB12563|IWB12516
H1085	7	710795046	710831963	36.918	5	IWB29012|IWB26071|IWB63186|IWB26072|IWB26070
H1086	7	714155769	714156114	0.346	2	IWA1207|IWB12652
H1087	7	714156165	714304350	148.186	4	IWB12651|IWB71198|IWB49197|IWA7297
H1088	7	720435837	720436480	0.644	4	IWA7938|IWB52090|IWB39410|IWB52089
H1089	7	724200801	724319595	118.795	4	IWB12788|IWB14695|IWB13994|IWB55724
H1090	7	725738538	725739412	0.875	3	IWA94|IWA95|IWB69546
H1091	7	730178075	730279940	101.866	5	IWB12392|IWB14374|IWB814|IWB7347|IWB12102
H1092	7	731085715	731088966	3.252	2	IWB64908|IWB64906
H1093	7	732042583	732061523	18.941	2	IWB12017|IWB42695
H1094	7	734786499	734788135	1.637	3	IWA7835|IWB45815|IWB45816
H1095	7	737133619	737299705	166.087	4	IWB64157|IWB67249|IWB28841|IWB28840
H1096	7	737800156	737968702	168.547	4	IWB38307|IWB38308|IWB42541|IWA8000
H1097	7	739520589	739537602	17.014	2	IWB46181|IWB60147
H1098	7	741239975	741241809	1.835	6	IWB72043|IWB73077|IWB73078|IWB73079|IWB73080|IWB73075
H1099	7	744287068	744442048	154.981	5	IWB13780|IWB54944|IWB50017|IWA7157|IWA7158
H1100	7	747618333	747628354	10.022	2	IWB58436|IWB30714
H1101	7	749278348	749404743	126.396	5	IWB72217|IWB63934|IWB63935|IWB72216|IWB72446
H1102	8	984989	985349	0.361	2	IWB57990|IWB58773
H1103	8	1617465	1617472	0.008	2	IWB64431|IWB64430
H1104	8	2519023	2519793	0.771	3	IWB63986|IWB74349|IWB74350
H1105	8	3240135	3275120	34.986	6	IWB72135|IWB72134|IWB72137|IWB72136|IWB3917|IWB21932
H1106	8	4142044	4144621	2.578	2	IWB5790|IWB64176
H1107	8	5582765	5674681	91.917	9	IWB64989|IWB67389|IWB36829|IWB23457|IWB67769|IWB35226|IWB8755|IWB66970|IWB66969
H1108	8	6178272	6250678	72.407	5	IWB29466|IWB8289|IWB2086|IWB11523|IWB4891
H1109	8	6395522	6395809	0.288	2	IWB23378|IWB62488
H1110	8	6754198	6754538	0.341	2	IWB68172|IWB4343
H1111	8	7372771	7373706	0.936	5	IWB75221|IWB56459|IWB6402|IWB75222|IWB21900
H1112	8	9166499	9166827	0.329	2	IWB71460|IWB39567
H1113	8	9780211	9780518	0.308	3	IWB65092|IWB4653|IWB65093
H1114	8	10633031	10633031	0.001	2	IWB4871|IWB4872
H1115	8	10956415	11087285	130.871	4	IWB74764|IWB73453|IWB57994|IWB57993
H1116	8	14983269	14986527	3.259	6	IWB2094|IWB39254|IWB37668|IWB39782|IWA7231|IWA7678
H1117	8	16442359	16455466	13.108	12	IWB74707|IWB32688|IWB32689|IWB29378|IWB11577|IWB11578|IWB30032|IWB48628|IWB49248|IWB30862|IWB60938|IWB6660
H1118	8	18822179	18822279	0.101	3	IWB72603|IWB72604|IWB12963
H1119	8	19247939	19390877	142.939	5	IWB71834|IWB64972|IWB45078|IWB64270|IWB27659
H1120	8	23599414	23782180	182.767	4	IWB41105|IWB64877|IWB41101|IWB71404
H1121	8	23946093	23957612	11.52	4	IWB8377|IWB8376|IWB11375|IWB73839
H1122	8	24940169	24942898	2.73	3	IWB10462|IWB10463|IWB68984
H1123	8	32286068	32286779	0.712	3	IWB57897|IWB6207|IWB1756
H1124	8	35322095	35342281	20.187	3	IWB41833|IWB30730|IWB11317
H1125	8	39904988	39908272	3.285	5	IWB35069|IWB5449|IWB63641|IWB48229|IWB48226
H1126	8	40184024	40244073	60.05	8	IWB3475|IWB2745|IWB14916|IWB2054|IWB8689|IWB3436|IWB3437|IWB1808
H1127	8	40245625	40246161	0.537	2	IWB11529|IWB14964
H1128	8	50908015	50910190	2.176	3	IWB30710|IWB30709|IWB35437
H1129	8	54754016	54755660	1.645	2	IWB62071|IWB61987
H1130	8	55456779	55456910	0.132	3	IWA748|IWB14564|IWA747
H1131	8	59064260	59064390	0.131	2	IWB5902|IWB6460
H1132	8	60253465	60259975	6.511	10	IWB52965|IWB21926|IWB4450|IWB24678|IWB33757|IWB33758|IWB62555|IWB24683|IWB24681|IWB24679
H1133	8	63107855	63110478	2.624	4	IWB56125|IWB35832|IWB35623|IWB56124
H1134	8	63393685	63411484	17.8	5	IWB27781|IWB27582|IWB62905|IWB26261|IWB63252
H1135	8	65561171	65704307	143.137	5	IWB27337|IWB57066|IWB57065|IWB24234|IWB48217
H1136	8	66180308	66186890	6.583	5	IWB4907|IWB73520|IWB59313|IWB45902|IWB45903
H1137	8	66865031	66954073	89.043	5	IWB10937|IWB10783|IWB72222|IWB7234|IWB23630
H1138	8	67413082	67415881	2.8	3	IWB8803|IWB8802|IWB8986
H1139	8	67922554	67933313	10.76	5	IWB10687|IWB57062|IWB57061|IWB47348|IWB21831
H1140	8	68464256	68590551	126.296	4	IWB12191|IWB38884|IWB35398|IWB6436
H1141	8	69818384	69818512	0.129	3	IWB52839|IWB52841|IWB52842
H1142	8	79289480	79301411	11.932	2	IWB6337|IWB53070
H1143	8	100965736	100968407	2.672	3	IWB53148|IWB57|IWB42512
H1144	8	116147709	116148910	1.202	3	IWB40699|IWB48790|IWB48693
H1145	8	117575507	117587045	11.539	2	IWB47168|IWB24351
H1146	8	117927993	117931155	3.163	2	IWB2481|IWB37541
H1147	8	133818996	133820308	1.313	4	IWB11650|IWB6289|IWB56689|IWA7860
H1148	8	140987227	141132847	145.621	4	IWB71405|IWB71406|IWB66534|IWB9734
H1149	8	205464500	205465315	0.816	3	IWB40632|IWB21152|IWB40631
H1150	8	230336598	230342260	5.663	5	IWB45768|IWB23177|IWB23272|IWB25047|IWB55764
H1151	8	239895041	239914752	19.712	4	IWB73984|IWB14775|IWB21652|IWB41155
H1152	8	240269713	240273245	3.533	2	IWB70301|IWB40524
H1153	8	241391923	241398479	6.557	7	IWB36433|IWB69287|IWB69288|IWB62552|IWB34188|IWB69412|IWB66162
H1154	8	242166162	242168720	2.559	3	IWB55125|IWB68368|IWB4141
H1155	8	244985279	244990883	5.605	3	IWB15024|IWB24225|IWB26991
H1156	8	244993085	244996012	2.928	2	IWB68379|IWB46822
H1157	8	245948771	245969193	20.423	3	IWB60904|IWB11716|IWB25955
H1158	8	354552320	354552371	0.052	2	IWB5363|IWB5714
H1159	8	368904600	368905784	1.185	2	IWB27477|IWB49639
H1160	8	414020340	414186365	166.026	4	IWB36501|IWB967|IWB35464|IWB968
H1161	8	416279702	416283178	3.477	2	IWB28234|IWB69511
H1162	8	419556895	419566477	9.583	2	IWB41807|IWB8550
H1163	8	452103494	452107821	4.328	2	IWB236|IWB11389
H1164	8	455676591	455679534	2.944	5	IWB31431|IWB31434|IWB31433|IWB31432|IWB63983
H1165	8	480341620	480343268	1.649	2	IWA7905|IWB63202
H1166	8	480378815	480569877	191.063	6	IWB65301|IWB35700|IWB677|IWB63776|IWB22863|IWB28828
H1167	8	481603489	481605122	1.634	2	IWB25353|IWB49991
H1168	8	488187781	488190069	2.289	3	IWA4195|IWA4194|IWA4193
H1169	8	488878740	488878813	0.074	2	IWB73314|IWB1851
H1170	8	501115349	501128498	13.15	2	IWB3471|IWB65234
H1171	8	502635614	502644117	8.504	4	IWB26723|IWB49662|IWA7534|IWB73763
H1172	8	507299732	507300966	1.235	2	IWA898|IWB4885
H1173	8	507501742	507510724	8.983	2	IWB7964|IWB57968
H1174	8	510000752	510000843	0.092	2	IWB65080|IWB8616
H1175	8	511055462	511072536	17.075	5	IWB40221|IWB12062|IWB580|IWB52028|IWB12061
H1176	8	522246540	522393438	146.899	4	IWB10658|IWB10659|IWB60420|IWB50586
H1177	8	523558814	523570514	11.701	5	IWB7785|IWB7784|IWB30872|IWB59720|IWB28034
H1178	8	543690556	543722448	31.893	4	IWB3723|IWB11632|IWB53292|IWB53293
H1179	8	544110797	544111904	1.108	2	IWB41410|IWB62238
H1180	8	552228700	552230631	1.932	2	IWB48764|IWB41010
H1181	8	553571577	553733107	161.531	4	IWB29718|IWB61095|IWB41396|IWB9814
H1182	8	556058494	556059730	1.237	2	IWB62773|IWB42559
H1183	8	556867060	556878946	11.887	7	IWB34373|IWB49370|IWB20841|IWA4085|IWB34606|IWA8196|IWA7519
H1184	8	564248694	564248911	0.218	3	IWB27454|IWB59348|IWB39915
H1185	8	574332380	574335392	3.013	2	IWB44858|IWB74232
H1186	8	574699200	574706042	6.843	9	IWB27903|IWB27904|IWB65344|IWB27905|IWB7902|IWB7903|IWB27902|IWB7901|IWB49738
H1187	8	578616654	578813912	197.259	5	IWB10634|IWB10905|IWB61850|IWB62325|IWB22606
H1188	8	579886895	580033561	146.667	6	IWB58918|IWB58916|IWB58917|IWA7516|IWB20917|IWB39136
H1189	8	581645554	581703948	58.395	6	IWB11492|IWB11493|IWB64673|IWB64674|IWB62366|IWB49258
H1190	8	581964489	581979233	14.745	6	IWB60466|IWB38943|IWB38942|IWB11818|IWB72987|IWB6001
H1191	8	582407922	582463427	55.506	5	IWB28184|IWB11860|IWB71968|IWB36652|IWB7999
H1192	8	583392067	583392116	0.05	2	IWB69438|IWB14043
H1193	8	585606344	585607586	1.243	2	IWB73083|IWB71946
H1194	8	586512242	586513916	1.675	3	IWB35687|IWB49602|IWB25044
H1195	8	586732220	586862779	130.56	6	IWA4218|IWA4219|IWA8290|IWB17786|IWA7692|IWB36059
H1196	8	588474526	588483493	8.968	2	IWB31045|IWB32668
H1197	8	601120537	601120709	0.173	2	IWB13711|IWB3824
H1198	8	602355968	602359354	3.387	4	IWB71476|IWB71475|IWB11828|IWB5515
H1199	8	623830585	623833120	2.536	3	IWB23665|IWB72547|IWB69371
H1200	8	627748978	627919401	170.424	5	IWB8462|IWB46996|IWB73162|IWB73161|IWB70607
H1201	8	628396789	628477740	80.952	4	IWA7745|IWB72850|IWA1196|IWA7225
H1202	8	630004376	630163418	159.043	6	IWA7388|IWB74408|IWB53398|IWB50651|IWB57136|IWB74409
H1203	8	630306239	630307383	1.145	7	IWB39502|IWA1148|IWB73554|IWB73553|IWB45792|IWB58358|IWB58359
H1204	8	651720533	651726706	6.174	2	IWB4049|IWB26493
H1205	8	659787924	659788077	0.154	2	IWB7178|IWB11501
H1206	8	661827611	661836497	8.887	3	IWB54259|IWB54260|IWB25408
H1207	8	664888768	664896474	7.707	4	IWB50898|IWB62317|IWB65144|IWB65143
H1208	8	668071372	668074097	2.726	5	IWB20033|IWA8136|IWA8137|IWB23227|IWA7870
H1209	8	669282319	669443242	160.924	5	IWB53106|IWB55621|IWB58890|IWB6101|IWB12466
H1210	8	672099965	672104960	4.996	3	IWB7145|IWA7221|IWB55756
H1211	8	676613665	676615590	1.926	4	IWB25787|IWB11838|IWB11839|IWB69866
H1212	8	694020984	694034113	13.13	2	IWA7888|IWB55956
H1213	8	697899734	697902147	2.414	5	IWB59359|IWB59360|IWB40807|IWB40808|IWB59355
H1214	8	705003572	705003651	0.08	3	IWB29288|IWB5637|IWB5635
H1215	8	705817270	705817298	0.029	2	IWB6077|IWB4320
H1216	8	707415778	707441486	25.709	5	IWB49708|IWB49175|IWB27888|IWB22644|IWB55101
H1217	8	708492768	708516738	23.971	4	IWB54439|IWB33456|IWB54440|IWB3110
H1218	8	710964440	710977029	12.59	2	IWB45884|IWB1639
H1219	8	721041819	721071673	29.855	3	IWB36207|IWB56230|IWB68946
H1220	8	723030798	723032067	1.27	2	IWB3107|IWB12192
H1221	8	723276117	723467258	191.142	8	IWB6874|IWB11666|IWB6868|IWB32621|IWB51747|IWB51746|IWB51745|IWB51540
H1222	8	723504241	723648423	144.183	4	IWB23301|IWB12008|IWB14496|IWB35905
H1223	8	724738499	724933783	195.285	7	IWB2271|IWB32512|IWB57102|IWB57101|IWB68888|IWB67436|IWB59283
H1224	8	725707518	725708252	0.735	3	IWB4750|IWA8490|IWB13886
H1225	8	726482551	726484198	1.648	3	IWB38503|IWA7679|IWA7680
H1226	8	730235308	730235507	0.2	2	IWB56482|IWB3898
H1227	8	730310007	730310060	0.054	2	IWB57606|IWB57605
H1228	8	732427621	732433255	5.635	3	IWB13291|IWB54058|IWB69615
H1229	8	736672449	736673273	0.825	2	IWB73646|IWB2621
H1230	8	737669217	737764942	95.726	5	IWB36775|IWB30339|IWB51093|IWB35001|IWB51094
H1231	8	738591216	738754417	163.202	7	IWB25571|IWB8610|IWB41022|IWB8816|IWB25321|IWB73060|IWB73061
H1232	8	739026808	739170216	143.409	4	IWB67684|IWB10631|IWB10632|IWB30540
H1233	8	739170670	739171026	0.357	2	IWB73871|IWB73870
H1234	8	741303963	741304069	0.107	3	IWB8243|IWB71427|IWB8244
H1235	8	741861450	741863746	2.297	5	IWA8354|IWB63991|IWB62764|IWB72472|IWB72473
H1236	8	742170575	742171881	1.307	2	IWB47108|IWB24050
H1237	8	750137826	750140239	2.414	3	IWB74787|IWB72180|IWB53593
H1238	8	750355802	750361390	5.589	4	IWB72806|IWB72807|IWB11409|IWB12260
H1239	8	752091135	752092509	1.375	3	IWB23127|IWB23126|IWB29816
H1240	8	759168631	759170455	1.825	2	IWB12091|IWB8730
H1241	8	765059826	765060250	0.425	3	IWB2890|IWB2889|IWB2891
H1242	8	765393184	765394388	1.205	3	IWB36630|IWB52781|IWB72728
H1243	8	769468661	769485373	16.713	3	IWB47939|IWB28166|IWB10322
H1244	8	772397461	772399902	2.442	6	IWB11935|IWB7294|IWB64607|IWB64608|IWB72700|IWB72699
H1245	8	775826925	775830149	3.225	4	IWA7542|IWB5646|IWB2509|IWB61285
H1246	8	776031854	776032619	0.766	3	IWB7539|IWB7540|IWB7609
H1247	8	779366860	779542400	175.541	7	IWB7374|IWB63997|IWB64802|IWA784|IWA785|IWB12975|IWA786
H1248	8	779542662	779577855	35.194	4	IWB14720|IWB55721|IWB48304|IWB8700
H1249	8	783466186	783472179	5.994	2	IWA939|IWA8058
H1250	8	796001835	796018712	16.878	5	IWB10560|IWB10559|IWB10751|IWB8118|IWB69415
H1251	8	796310522	796315673	5.152	5	IWB10521|IWB56764|IWB55498|IWB7224|IWB22558
H1252	8	796464434	796652117	187.684	4	IWB33031|IWB74076|IWB74074|IWB74075
H1253	8	798503477	798550925	47.449	13	IWB54457|IWB54126|IWB11439|IWB60180|IWB60179|IWB42890|IWB42697|IWB55459|IWB55458|IWB57095|IWB57092|IWB57093|IWB57094
H1254	8	800171804	800189583	17.78	2	IWB47235|IWB46474
H1255	8	802891229	802891985	0.757	2	IWB25014|IWB31362
H1256	8	804669710	804670811	1.102	3	IWB49437|IWB29936|IWB29935
H1257	8	810327817	810329168	1.352	3	IWB42423|IWB53714|IWB1858
H1258	8	813949178	813950434	1.257	2	IWB42113|IWB67248
H1259	8	813950490	813950998	0.509	2	IWB67247|IWB70610
H1260	8	814940717	815048807	108.091	4	IWB33964|IWB33965|IWB47770|IWB60054
H1261	8	820500787	820502459	1.673	2	IWB57330|IWB40707
H1262	8	822680649	822828858	148.21	8	IWB72191|IWB72195|IWB72194|IWB72193|IWB72192|IWB72981|IWB66499|IWB66935
H1263	8	822907579	822973290	65.712	6	IWB70229|IWB72658|IWB72657|IWB46567|IWB72656|IWB72659
H1264	8	826082193	826093778	11.586	6	IWB35514|IWA8203|IWB44062|IWB44061|IWB34409|IWB28522
H1265	9	773109	774603	1.495	4	IWB12372|IWB12373|IWB23511|IWB29480
H1266	9	2603240	2622416	19.177	3	IWB63011|IWB28211|IWB42836
H1267	9	2625579	2626318	0.74	3	IWB11114|IWB31017|IWB56281
H1268	9	2626373	2627250	0.878	2	IWB59693|IWB34942
H1269	9	3298730	3298940	0.211	2	IWB72099|IWB60457
H1270	9	3299057	3337956	38.9	4	IWB46078|IWB1155|IWB60455|IWB75329
H1271	9	4195076	4394609	199.534	4	IWB48749|IWB27536|IWB10683|IWB40814
H1272	9	4405392	4488809	83.418	6	IWB17941|IWB40683|IWB21976|IWB30807|IWB49844|IWB49841
H1273	9	4490757	4493734	2.978	2	IWB49831|IWB22162
H1274	9	7221613	7225524	3.912	3	IWB50548|IWB30427|IWB35081
H1275	9	11749951	11761364	11.414	3	IWB29377|IWB35202|IWB32543
H1276	9	14135114	14135159	0.046	2	IWB17577|IWB64404
H1277	9	22367382	22368706	1.325	4	IWB48228|IWB63640|IWB49230|IWB48227
H1278	9	23744800	23744932	0.133	2	IWB75114|IWB58167
H1279	9	32200852	32202174	1.323	2	IWB42835|IWB63461
H1280	9	41537189	41540426	3.238	3	IWB42708|IWB41256|IWB42100
H1281	9	47779541	47779619	0.079	2	IWB36460|IWB5078
H1282	9	145200424	145201461	1.038	4	IWB60596|IWB40633|IWB40634|IWB63944
H1283	9	394749419	394753267	3.849	2	IWB64806|IWA8630
H1284	9	511935718	511937417	1.7	2	IWB54133|IWB56466
H1285	9	603414537	603414633	0.097	2	IWB56671|IWB45351
H1286	9	604354974	604355717	0.744	3	IWB59645|IWB18684|IWB59644
H1287	9	604358491	604361939	3.449	2	IWB59646|IWA8059
H1288	9	606862789	607001306	138.518	12	IWB45229|IWB17449|IWB52398|IWB52402|IWB52401|IWB52400|IWB23810|IWB55041|IWB23809|IWB23543|IWB23542|IWB37443
H1289	9	607515114	607515351	0.238	2	IWB41563|IWB41561
H1290	9	610346228	610353094	6.867	3	IWB35284|IWA6777|IWB26400
H1291	9	610994698	611007063	12.366	2	IWB7920|IWB7537
H1292	9	613389792	613406173	16.382	2	IWB13275|IWB10661
H1293	9	613618953	613782966	164.014	11	IWB26812|IWB7769|IWB9864|IWB40719|IWA4081|IWB50461|IWB50460|IWB27498|IWB42149|IWB22530|IWB27626
H1294	10	3868779	3876307	7.529	2	IWB38911|IWB52137
H1295	10	5951503	5958914	7.412	2	IWB61774|IWB59437
H1296	10	9912816	9929340	16.525	2	IWB43751|IWB72664
H1297	10	12399327	12399552	0.226	2	IWA8389|IWB72445
H1298	10	24757405	24763584	6.18	2	IWB6756|IWB13586
H1299	10	27673199	27682075	8.877	6	IWB39337|IWB40012|IWB40011|IWB40010|IWB40013|IWA7394
H1300	10	29069758	29069890	0.133	3	IWB54290|IWB26155|IWB67355
H1301	10	29077809	29077953	0.145	3	IWB70443|IWB6860|IWB11606
H1302	10	37045855	37061773	15.919	3	IWA4232|IWB6335|IWB42619
H1303	10	38369280	38369693	0.414	3	IWB34759|IWB3922|IWB5591
H1304	10	38730410	38731263	0.854	2	IWB46982|IWA4320
H1305	10	40442520	40443596	1.077	2	IWB34919|IWB22239
H1306	10	43698729	43698899	0.171	3	IWA5831|IWB6917|IWB34953
H1307	10	46049976	46172369	122.394	7	IWB5953|IWB39302|IWB52170|IWB10267|IWB61077|IWB1396|IWB1397
H1308	10	50746991	50753779	6.789	4	IWB64352|IWB64353|IWB6688|IWB8400
H1309	10	51199318	51205608	6.291	2	IWB71810|IWB9113
H1310	10	60036951	60043112	6.162	2	IWA7537|IWB52694
H1311	10	68562024	68565720	3.697	2	IWB54030|IWB21625
H1312	10	99034345	99034556	0.212	3	IWA79|IWA78|IWB35628
H1313	10	100634158	100672602	38.445	4	IWA1178|IWA826|IWB34665|IWB62659
H1314	10	109423786	109443852	20.067	3	IWB5392|IWB35812|IWB2155
H1315	10	111167676	111292941	125.266	5	IWB37681|IWA115|IWB62767|IWB55368|IWB25927
H1316	10	112767649	112937229	169.581	4	IWB2614|IWB50522|IWA110|IWA109
H1317	10	114586757	114587654	0.898	3	IWA7271|IWA7270|IWB54697
H1318	10	119931402	119931723	0.322	2	IWB46684|IWB63606
H1319	10	164631729	164634788	3.06	3	IWB61120|IWB62986|IWB63118
H1320	10	465403814	465407740	3.927	2	IWA1074|IWB21561
H1321	10	467297890	467309323	11.434	3	IWB20983|IWB12785|IWB28258
H1322	10	531074549	531240864	166.316	7	IWB30949|IWB48417|IWB48418|IWB40072|IWB31313|IWB31311|IWB58994
H1323	10	538486664	538491760	5.097	3	IWB35330|IWB44966|IWB59924
H1324	10	541340578	541362821	22.244	5	IWB12211|IWB34345|IWB45865|IWB43280|IWB25199
H1325	10	562405120	562406116	0.997	3	IWB61674|IWA7448|IWB31143
H1326	10	570263003	570269131	6.129	5	IWB9|IWB33127|IWB33128|IWB6945|IWB6937
H1327	10	570469536	570478598	9.063	3	IWB56097|IWB5379|IWB5380
H1328	10	583754875	583953306	198.432	7	IWB3123|IWB851|IWB36471|IWB3705|IWB3706|IWB28352|IWB6208
H1329	10	583968986	583975131	6.146	3	IWB3142|IWB21367|IWB43750
H1330	10	584276335	584276420	0.086	3	IWA4201|IWB20890|IWB20891
H1331	10	584548526	584695688	147.163	4	IWA7346|IWB42278|IWB42279|IWA101
H1332	10	584799733	584812071	12.339	2	IWB25253|IWB29546
H1333	10	594211768	594283647	71.88	4	IWB34865|IWA7442|IWB4910|IWB8287
H1334	10	595821043	595986307	165.265	5	IWB47419|IWB40398|IWB52955|IWB19982|IWA7535
H1335	10	597692883	597693568	0.686	4	IWB27434|IWB10950|IWB43375|IWB27435
H1336	10	598433193	598591987	158.795	6	IWB58650|IWB5911|IWB7386|IWB23666|IWB4642|IWB1450
H1337	10	600898972	600900632	1.661	3	IWB4821|IWB5803|IWB12302
H1338	10	605731056	605732844	1.789	2	IWB58791|IWB40846
H1339	10	608830565	608835106	4.542	4	IWB29177|IWB34721|IWB68318|IWB7798
H1340	10	610493980	610500044	6.065	2	IWB8103|IWB306
H1341	10	610817210	610817290	0.081	2	IWB51551|IWB39801
H1342	10	611581449	611592283	10.835	3	IWB19544|IWB74017|IWB71770
H1343	10	613582610	613610462	27.853	3	IWB35298|IWB59546|IWB71273
H1344	10	613611695	613611758	0.064	2	IWA8391|IWB71271
H1345	10	614870817	614871096	0.28	2	IWA7310|IWB5865
H1346	10	617097224	617097295	0.072	2	IWB6683|IWB7070
H1347	10	623951153	623951166	0.014	2	IWB29137|IWB56960
H1348	10	626309003	626322456	13.454	6	IWB27644|IWB27643|IWB27645|IWB60773|IWB56116|IWB49186
H1349	10	629475980	629476768	0.789	3	IWB12737|IWB30041|IWB48750
H1350	10	629860680	629917641	56.962	4	IWA7653|IWB28717|IWB6183|IWB58552
H1351	10	631922510	631925866	3.357	4	IWB29781|IWB43187|IWB2846|IWB23132
H1352	10	632858990	632863242	4.253	3	IWB29438|IWB11729|IWA8168
H1353	10	636963423	636971497	8.075	2	IWB62271|IWB8853
H1354	10	660474620	660475531	0.912	2	IWB62495|IWB61756
H1355	10	660985564	661050327	64.764	9	IWB56313|IWB56311|IWB56310|IWB12181|IWB28552|IWB61041|IWB28551|IWB27364|IWB27365
H1356	10	665501206	665606248	105.043	4	IWB57342|IWB26480|IWB26481|IWB74680
H1357	10	687546714	687547912	1.199	2	IWB49657|IWB24187
H1358	10	687556618	687556809	0.192	3	IWB41854|IWB41853|IWB41852
H1359	10	688093814	688095682	1.869	2	IWB41763|IWB41761
H1360	10	693277365	693278257	0.893	2	IWB64582|IWB6821
H1361	10	697951945	697953510	1.566	4	IWB23359|IWB67749|IWB23361|IWB23363
H1362	10	704644770	704644826	0.057	2	IWB6083|IWB6276
H1363	10	705178250	705180390	2.141	9	IWB73845|IWB73842|IWB11714|IWB11715|IWB73843|IWB73844|IWB4506|IWB4507|IWB5706
H1364	10	705508244	705508415	0.172	2	IWB71467|IWB11380
H1365	10	705760977	705767555	6.579	2	IWB21839|IWB9301
H1366	10	707040430	707041350	0.921	2	IWB41089|IWB28848
H1367	10	708567733	708569756	2.024	7	IWB19744|IWB52322|IWB52323|IWB52320|IWB52321|IWB21050|IWB49797
H1368	10	708613328	708688973	75.646	5	IWB74685|IWB74688|IWB42202|IWB8487|IWB4819
H1369	10	710412391	710413113	0.723	2	IWB73460|IWB73461
H1370	10	710663223	710666586	3.364	3	IWB22582|IWA7765|IWB12624
H1371	10	712856493	712868046	11.554	14	IWA1066|IWA1067|IWB54420|IWB73327|IWB36617|IWB73328|IWB73329|IWB64513|IWB73320|IWB73321|IWB73323|IWB64509|IWB64507|IWB64506
H1372	10	713505420	713522686	17.267	2	IWB10176|IWB1381
H1373	10	713522770	713523345	0.576	8	IWB71844|IWB202|IWB8406|IWB66546|IWB1382|IWB42370|IWB1379|IWB8407
H1374	10	717740338	717741597	1.26	7	IWB73505|IWB59018|IWB59017|IWB42404|IWB61381|IWB61383|IWB42403
H1375	10	717964526	717966388	1.863	2	IWB5798|IWB66663
H1376	10	721383014	721384573	1.56	4	IWB23448|IWB23449|IWB72417|IWB62189
H1377	10	722886272	722910403	24.132	3	IWB25400|IWB62397|IWB62395
H1378	10	726215255	726215300	0.046	2	IWB3570|IWB3569
H1379	10	726445121	726447605	2.485	4	IWB24690|IWB24691|IWB6186|IWB34478
H1380	10	727115200	727117255	2.056	2	IWB63977|IWB63979
H1381	10	729708119	729709014	0.896	2	IWB52406|IWB52407
H1382	10	732511707	732519143	7.437	5	IWB23688|IWB60136|IWB36777|IWB42226|IWB42227
H1383	10	733888036	733888036	0.001	2	IWB68900|IWB68901
H1384	10	733912688	733915771	3.084	2	IWB70735|IWB28716
H1385	10	737337155	737340127	2.973	4	IWB58574|IWB58576|IWB1407|IWB59368
H1386	10	737382430	737384761	2.332	2	IWB71319|IWB58533
H1387	10	737409358	737411103	1.746	2	IWB58396|IWB22343
H1388	10	738750567	738753270	2.704	3	IWB1389|IWB42416|IWB22926
H1389	10	738776697	738778077	1.381	2	IWB54282|IWB73556
H1390	10	738781109	738781226	0.118	2	IWB11368|IWB11369
H1391	10	738781346	738782355	1.01	4	IWB71699|IWB71698|IWB71697|IWB71693
H1392	10	739036947	739038823	1.877	4	IWB23864|IWB27679|IWB59774|IWB45417
H1393	10	739067833	739068031	0.199	3	IWB34829|IWB36219|IWB45268
H1394	10	742379139	742566519	187.381	10	IWB33907|IWB48829|IWB45728|IWB72931|IWB72930|IWB35434|IWB72383|IWA7365|IWA7364|IWA4084
H1395	10	743949777	743952566	2.79	5	IWB574|IWB11491|IWB11490|IWA4690|IWB44830
H1396	11	1047091	1048059	0.969	2	IWB60835|IWB33242
H1397	11	1764969	1787464	22.496	9	IWB26826|IWB71798|IWB71796|IWB40470|IWB4627|IWB40469|IWB8207|IWB26820|IWB34896
H1398	11	4522599	4537310	14.712	2	IWB3541|IWB12274
H1399	11	4850018	4852567	2.55	6	IWB74227|IWB61098|IWB74226|IWB74228|IWB70794|IWB72348
H1400	11	6141494	6150178	8.685	4	IWB13016|IWB35326|IWB22429|IWB14041
H1401	11	7027468	7037357	9.89	2	IWB8794|IWB931
H1402	11	7037780	7043823	6.044	7	IWB71725|IWB28274|IWB71727|IWB932|IWB27019|IWB71989|IWB71988
H1403	11	12888652	12893599	4.948	4	IWB73893|IWB47345|IWA7268|IWB8084
H1404	11	13411331	13422601	11.271	2	IWB71830|IWB63894
H1405	11	14110484	14122819	12.336	10	IWB73384|IWB28771|IWB28772|IWB72103|IWB6068|IWB31302|IWB36235|IWB34259|IWB34258|IWB34257
H1406	11	19742868	19755447	12.58	4	IWB50288|IWB42788|IWB70256|IWB63876
H1407	11	21377861	21377923	0.063	2	IWB44350|IWB30977
H1408	11	25784269	25784459	0.191	2	IWB59993|IWB59992
H1409	11	35514928	35520951	6.024	4	IWB11340|IWB73564|IWB6839|IWB73563
H1410	11	37694479	37696306	1.828	2	IWB70449|IWB70450
H1411	11	37851396	38028448	177.053	4	IWB54814|IWB73561|IWB4721|IWB4720
H1412	11	38282413	38282839	0.427	3	IWB61525|IWB61490|IWB61487
H1413	11	38790071	38791427	1.357	4	IWB73832|IWB73831|IWB73830|IWB12982
H1414	11	46608559	46621203	12.645	5	IWB37325|IWB3394|IWB7491|IWB73532|IWB12856
H1415	11	88844628	88845559	0.932	2	IWB67486|IWB67484
H1416	11	95673011	95673437	0.427	2	IWB72006|IWB72004
H1417	11	97922336	97924643	2.308	6	IWB71004|IWB71003|IWB71001|IWB71000|IWB70998|IWB7594
H1418	11	241184731	241185333	0.603	3	IWB27565|IWB27564|IWB58297
H1419	11	456363115	456363241	0.127	3	IWB71098|IWB71097|IWB71096
H1420	11	467713151	467713173	0.023	2	IWB56183|IWB12525
H1421	11	502956799	502956867	0.069	2	IWB57362|IWB1616
H1422	11	519257762	519257921	0.16	3	IWB6680|IWB51658|IWB51659
H1423	11	527294153	527297628	3.476	4	IWB25905|IWA8163|IWB59011|IWB34413
H1424	11	527956828	527983113	26.286	4	IWB10366|IWB989|IWB28992|IWB54157
H1425	11	531340652	531340764	0.113	3	IWB43353|IWB61846|IWB73717
H1426	11	532437109	532627501	190.393	4	IWA7411|IWA7767|IWB11483|IWB71823
H1427	11	535049503	535084959	35.457	8	IWB4300|IWB32990|IWB30335|IWB46476|IWA7168|IWA7167|IWB55457|IWA4070
H1428	11	536919280	536920270	0.991	3	IWB58701|IWB72441|IWB35646
H1429	11	538266828	538270971	4.144	4	IWB10924|IWB57805|IWB71616|IWB71617
H1430	11	544595573	544598455	2.883	3	IWA7437|IWB11605|IWB34475
H1431	11	552018164	552032822	14.659	5	IWB14681|IWA1007|IWA1006|IWB34520|IWB55673
H1432	11	556060515	556074149	13.635	6	IWB7849|IWB1043|IWB31113|IWB38919|IWB20947|IWB27710
H1433	11	558595116	558596778	1.663	4	IWB31470|IWB70894|IWB55798|IWB70892
H1434	11	560010308	560014823	4.516	4	IWB62993|IWA782|IWB57491|IWB57492
H1435	11	575609141	575618112	8.972	3	IWB154|IWB22172|IWB22171
H1436	11	588433803	588436608	2.806	3	IWB20288|IWB39883|IWB35049
H1437	11	590438292	590438372	0.081	2	IWB39515|IWB54480
H1438	11	590858767	590983338	124.572	4	IWB38423|IWB51855|IWB51856|IWB6739
H1439	11	601195921	601198468	2.548	2	IWB1598|IWB35047
H1440	11	609317698	609515871	198.174	4	IWB8708|IWB53740|IWA908|IWB10847
H1441	11	612253863	612327439	73.577	4	IWB73894|IWB35851|IWB1998|IWB66294
H1442	11	612761006	612846937	85.932	5	IWB45396|IWB47175|IWB50826|IWB38031|IWB50827
H1443	11	619448465	619448486	0.022	2	IWB30432|IWB24569
H1444	11	620058446	620058664	0.219	2	IWB2135|IWB2134
H1445	11	621326896	621436886	109.991	6	IWB23339|IWB23338|IWB72772|IWB7278|IWB23337|IWB36159
H1446	11	633916046	633917367	1.322	2	IWB616|IWB24191
H1447	11	636789460	636790369	0.91	2	IWB52254|IWB39351
H1448	11	642700392	642700537	0.146	2	IWB71718|IWB14445
H1449	11	643650839	643773354	122.516	4	IWB72696|IWB7100|IWB73510|IWA4115
H1450	11	645298527	645428469	129.943	6	IWB34604|IWB72883|IWB55667|IWB64987|IWB11229|IWB4426
H1451	11	646256795	646316842	60.048	5	IWB42514|IWB38988|IWB24856|IWB24857|IWB32962
H1452	11	649471218	649605374	134.157	7	IWB53155|IWB32544|IWB45457|IWB42022|IWB42023|IWB33076|IWB35551
H1453	11	649824499	649828233	3.735	2	IWB10640|IWB22176
H1454	11	650888596	650937721	49.126	4	IWB72184|IWB58130|IWB35044|IWB60914
H1455	11	651753149	651753618	0.47	2	IWB74188|IWB74189
H1456	11	651800378	651992326	191.949	7	IWB10236|IWB38327|IWB35505|IWB7266|IWB11859|IWB45261|IWB30656
H1457	11	652253099	652373458	120.36	9	IWB6882|IWB2141|IWB43626|IWB12594|IWA968|IWB40627|IWB58738|IWB58739|IWB58741
H1458	11	653011541	653011679	0.139	3	IWB48353|IWB43238|IWB48354
H1459	11	656902657	656903954	1.298	4	IWB44213|IWB54805|IWB51353|IWB51352
H1460	11	657172009	657296117	124.109	6	IWB3246|IWB4448|IWB48621|IWB48622|IWB12222|IWB42555
H1461	11	660589174	660655840	66.667	6	IWB72538|IWB6021|IWB73485|IWB73486|IWB12144|IWB6896
H1462	11	663106736	663106765	0.03	2	IWB7958|IWB7957
H1463	11	666049369	666053528	4.16	2	IWB63198|IWB58397
H1464	11	666359957	666360659	0.703	2	IWB55792|IWB55438
H1465	11	667612760	667614800	2.041	3	IWB12723|IWB66861|IWB27443
H1466	11	667876884	667879993	3.11	3	IWB49287|IWB35845|IWB32456
H1467	12	3611161	3612636	1.476	2	IWB41441|IWB12054
H1468	12	42538561	42538585	0.025	2	IWB23513|IWB23512
H1469	12	121181547	121182921	1.375	4	IWB3255|IWB14984|IWB15026|IWB17081
H1470	12	329009422	329009513	0.092	3	IWB32834|IWB32835|IWB32836
H1471	12	408244986	408245742	0.757	2	IWA4342|IWA6186
H1472	12	455250967	455253024	2.058	3	IWB20689|IWB45193|IWB45192
H1473	12	455339346	455532169	192.824	8	IWB19353|IWB12209|IWB11207|IWB7083|IWB35934|IWB10207|IWB36085|IWB34970
H1474	12	455746648	455764157	17.51	4	IWB18990|IWB9171|IWB7428|IWB12286
H1475	12	477891622	477894747	3.126	2	IWB15457|IWB44356
H1476	13	10538	13932	3.395	3	IWB50540|IWB70789|IWB54146
H1477	13	1548786	1548786	0.001	2	IWB41715|IWB7817
H1478	13	2808710	2808879	0.17	2	IWB65854|IWB42948
H1479	13	2868593	2893915	25.323	3	IWB60605|IWB25463|IWB23800
H1480	13	4849466	4850596	1.131	4	IWB34408|IWB51433|IWB51432|IWB34972
H1481	13	4958643	4959389	0.747	2	IWB6912|IWB5856
H1482	13	8059358	8059402	0.045	2	IWB7371|IWB12158
H1483	13	8239070	8243255	4.186	2	IWB43091|IWB40165
H1484	13	8243590	8246313	2.724	2	IWA7361|IWB50844
H1485	13	9835425	9854616	19.192	4	IWB4171|IWB11440|IWA6463|IWB29632
H1486	13	19231334	19233484	2.151	3	IWA7303|IWB59582|IWB71078
H1487	13	19271084	19272788	1.705	5	IWB41931|IWB3728|IWA419|IWB4880|IWB12627
H1488	13	20816445	20998554	182.11	4	IWB52605|IWB40035|IWB12085|IWB48151
H1489	13	28668697	28670980	2.284	2	IWB10967|IWB602
H1490	13	32880838	32887598	6.761	3	IWB8704|IWB8705|IWB8709
H1491	13	33126840	33130557	3.718	2	IWB46908|IWA825
H1492	13	37617802	37620213	2.412	3	IWB63885|IWB63883|IWB63884
H1493	13	41418124	41427681	9.558	5	IWB46840|IWA8154|IWB52454|IWA8155|IWB7826
H1494	13	46230717	46234071	3.355	6	IWB7718|IWA7777|IWB8267|IWB8266|IWB51581|IWB10981
H1495	13	47448667	47645147	196.481	5	IWB11872|IWB4031|IWB6696|IWB7316|IWB12010
H1496	13	48465090	48467403	2.314	3	IWB54064|IWB66284|IWB29625
H1497	13	49513653	49514689	1.037	3	IWB51518|IWB8436|IWB8437
H1498	13	65980605	66091649	111.045	6	IWB36601|IWB8225|IWA7865|IWB56716|IWB64755|IWB64756
H1499	13	74748390	74752289	3.9	3	IWB52121|IWB27896|IWB50975
H1500	13	78144778	78173120	28.343	5	IWB62861|IWA8201|IWA8202|IWB1332|IWB24671
H1501	13	86660978	86664208	3.231	3	IWB29712|IWB52221|IWA7473
H1502	13	92181645	92185222	3.578	3	IWA7758|IWA7759|IWB56402
H1503	13	104232188	104234662	2.475	3	IWA6912|IWB51084|IWB48289
H1504	13	104239957	104240464	0.508	2	IWB1160|IWB62283
H1505	13	107255489	107271254	15.766	4	IWB70840|IWB70837|IWB70848|IWB70847
H1506	13	107893099	107893310	0.212	2	IWB63162|IWB63161
H1507	13	146406469	146406525	0.057	2	IWB44795|IWB44793
H1508	13	390231023	390367034	136.012	4	IWB48299|IWA7925|IWA7926|IWB29961
H1509	13	391517412	391548987	31.576	9	IWA7691|IWA7690|IWB67310|IWB9412|IWA7961|IWB14407|IWB15101|IWB8238|IWB8237
H1510	13	393918327	393918811	0.485	3	IWB2513|IWB8069|IWB53542
H1511	13	395057817	395058093	0.277	2	IWB74769|IWB8687
H1512	13	395870761	395875786	5.026	2	IWB43032|IWB10273
H1513	13	414048856	414166539	117.684	10	IWB9139|IWB9138|IWA7598|IWA7597|IWA7596|IWB53640|IWB53638|IWB53637|IWB787|IWB45248
H1514	13	415355783	415356067	0.285	3	IWB12830|IWB71584|IWB13508
H1515	13	416124661	416126530	1.87	2	IWB51106|IWB59122
H1516	13	419686512	419868519	182.008	4	IWB44020|IWA5735|IWB66579|IWB9056
H1517	13	430246118	430248401	2.284	3	IWB34498|IWA7130|IWA7129
H1518	13	438334884	438471873	136.99	4	IWB25919|IWB28606|IWB46475|IWB7120
H1519	13	442271857	442271907	0.051	2	IWB61122|IWB45593
H1520	13	444529778	444542146	12.369	3	IWB9838|IWB43473|IWB60496
H1521	13	448092743	448110016	17.274	2	IWB10665|IWB34674
H1522	13	450164158	450165206	1.049	4	IWB59420|IWA122|IWA121|IWB36274
H1523	13	450463853	450555771	91.919	10	IWB10938|IWB10858|IWB10054|IWB73735|IWB7956|IWB73508|IWB11635|IWB11637|IWB11636|IWB67797
H1524	13	456972905	457089670	116.766	4	IWB60841|IWB64900|IWB48181|IWB10795
H1525	13	461484603	461519215	34.613	9	IWB14779|IWA8008|IWA8009|IWB11305|IWB22565|IWB73141|IWB45690|IWA104|IWB33420
H1526	13	462155040	462165384	10.345	6	IWB31223|IWB2714|IWB12120|IWB5642|IWB36452|IWB12121
H1527	13	462862508	463061870	199.363	7	IWB11700|IWA8013|IWA8012|IWB52403|IWB55722|IWB55723|IWB7558
H1528	13	463601107	463763295	162.189	4	IWB27684|IWB55284|IWB64699|IWB66908
H1529	13	464477215	464478841	1.627	12	IWB46440|IWB7040|IWB11110|IWB71628|IWB71627|IWB34505|IWB11111|IWB49768|IWB28175|IWB71631|IWB49769|IWB71630
H1530	13	465278185	465310692	32.508	4	IWB43405|IWB10451|IWB10452|IWB60329
H1531	13	465539797	465541233	1.437	3	IWB43407|IWB51790|IWB35711
H1532	13	466014093	466036233	22.141	3	IWB9913|IWB73898|IWB47643
H1533	13	466985276	466986066	0.791	8	IWB31123|IWB72014|IWB35903|IWB35904|IWB3859|IWB72013|IWB61930|IWB61929
H1534	13	467379070	467383110	4.041	5	IWB43262|IWB35729|IWB43034|IWB126|IWB44905
H1535	13	468462646	468468200	5.555	4	IWB3506|IWB43912|IWB41765|IWB10152
H1536	13	468872535	469063643	191.109	5	IWB13024|IWA7773|IWB45310|IWB28986|IWB33328
H1537	13	469609461	469612740	3.28	4	IWB29411|IWB7320|IWB12016|IWB10998
H1538	13	470034073	470174543	140.471	8	IWA8118|IWB23353|IWB39750|IWA7220|IWB41290|IWB55170|IWB48529|IWB38892
H1539	13	472278454	472346656	68.203	4	IWB7125|IWB10071|IWB11656|IWA8308
H1540	13	472918648	472919434	0.787	2	IWB10177|IWB9000
H1541	13	473625372	473637892	12.521	4	IWB20039|IWB23250|IWB14582|IWA703
H1542	13	474482999	474542687	59.689	5	IWB9533|IWA4050|IWA4049|IWA4048|IWB4699
H1543	13	475268243	475467655	199.413	13	IWB58797|IWB5443|IWB74983|IWB74982|IWB48382|IWB3965|IWB7271|IWB563|IWB46350|IWB75149|IWB36131|IWB75152|IWB75151
H1544	13	476403211	476602949	199.739	5	IWB14825|IWB42774|IWB42777|IWB42776|IWB42775
H1545	13	481896807	481912624	15.818	4	IWB12116|IWB12115|IWB34540|IWB33444
H1546	13	486749984	486750566	0.583	3	IWB52862|IWB52863|IWB52864
H1547	13	488262220	488262509	0.29	2	IWB14493|IWB4229
H1548	13	488629690	488633741	4.052	3	IWB73348|IWB21444|IWB21443
H1549	13	494870776	494878012	7.237	4	IWB44434|IWB11865|IWB11866|IWB33346
H1550	13	502219443	502376142	156.7	4	IWB22035|IWB34371|IWB21197|IWB21198
H1551	13	503055142	503058896	3.755	9	IWB37150|IWB52488|IWB52490|IWB52491|IWB52492|IWB52493|IWB34784|IWB52494|IWB52495
H1552	13	503782941	503946083	163.143	5	IWB4568|IWB48920|IWA7404|IWA7405|IWB59214
H1553	13	504567362	504573857	6.496	3	IWB28390|IWB28391|IWB28392
H1554	13	504762580	504873457	110.878	4	IWB54628|IWB5459|IWB56233|IWB3848
H1555	13	510552095	510556165	4.071	3	IWB54337|IWB52993|IWB50745
H1556	13	511876958	511879033	2.076	4	IWB27024|IWA4052|IWA4051|IWB62312
H1557	13	512235024	512237695	2.672	4	IWB19609|IWB50162|IWA7529|IWB36640
H1558	13	514092395	514094650	2.256	2	IWB233|IWB56637
H1559	13	519885300	519951614	66.315	4	IWB60872|IWB11426|IWB23857|IWB24389
H1560	13	528114333	528114481	0.149	3	IWB36055|IWB2462|IWB2463
H1561	13	538320137	538320718	0.582	2	IWB33263|IWB47924
H1562	13	539945331	540060930	115.6	8	IWB36671|IWB47646|IWB50648|IWB10250|IWB41287|IWB41288|IWB33279|IWB12027
H1563	13	548609639	548609988	0.35	2	IWB8680|IWB619
H1564	13	552055983	552071360	15.378	2	IWB6702|IWB26710
H1565	13	552515187	552527305	12.119	4	IWB6371|IWB23591|IWB22137|IWB62387
H1566	13	555540648	555542369	1.722	2	IWB34534|IWB9503
H1567	13	559505870	559517085	11.216	4	IWB10966|IWB10965|IWB6184|IWB6820
H1568	13	563839634	563843169	3.536	2	IWB71642|IWB50059
H1569	13	565534885	565547308	12.424	5	IWB51489|IWB51488|IWB8003|IWB46410|IWB59530
H1570	13	565752908	565754434	1.527	4	IWB67424|IWB67425|IWB69121|IWB74318
H1571	13	568157070	568272320	115.251	4	IWB25393|IWA7834|IWA7833|IWB26844
H1572	13	569456304	569655909	199.606	10	IWB12408|IWB12409|IWB36773|IWB7191|IWB28299|IWB5817|IWB35977|IWB35976|IWB22492|IWB64483
H1573	13	569865004	569867638	2.635	2	IWB66355|IWA4205
H1574	13	571784880	571789596	4.717	2	IWB26647|IWB575
H1575	13	573040371	573042783	2.413	2	IWB73552|IWB38386
H1576	13	574748096	574751981	3.886	6	IWB20356|IWB20354|IWB56479|IWB11626|IWA2224|IWB34563
H1577	13	578058239	578063880	5.642	4	IWB10862|IWB10726|IWB73709|IWB73710
H1578	13	580802664	580948054	145.391	4	IWA7553|IWB8369|IWB42241|IWB25895
H1579	13	581108202	581109061	0.86	2	IWB35164|IWA7579
H1580	13	582961477	582965021	3.545	3	IWB12018|IWB35517|IWB51982
H1581	13	584574897	584713921	139.025	6	IWB30519|IWB29981|IWB34418|IWB34653|IWB40218|IWB72425
H1582	13	585409253	585489502	80.25	5	IWB36383|IWB28837|IWB74648|IWB61301|IWB12023
H1583	13	586596693	586726300	129.608	10	IWB24968|IWB61908|IWB3558|IWB6893|IWA4221|IWA4220|IWB34703|IWB23955|IWB23954|IWB48364
H1584	13	588550218	588741064	190.847	5	IWA1|IWB1537|IWB1538|IWA454|IWB10843
H1585	13	591317781	591487533	169.753	6	IWB58986|IWB49886|IWB24477|IWB24478|IWB11585|IWB63075
H1586	13	593120717	593121222	0.506	2	IWB24094|IWB24095
H1587	13	594351649	594352381	0.733	2	IWB72051|IWB4190
H1588	13	594960125	594962056	1.932	2	IWB8258|IWB66780
H1589	13	595289130	595289864	0.735	2	IWA5170|IWA1472
H1590	13	595372444	595537652	165.209	6	IWB64235|IWB832|IWB37063|IWB8767|IWA835|IWB12366
H1591	13	596465229	596561079	95.851	4	IWB52008|IWB38320|IWB38319|IWB69752
H1592	13	607950063	607950808	0.746	2	IWB44564|IWB74962
H1593	13	611038131	611133771	95.641	4	IWB72313|IWB72312|IWB71755|IWB39812
H1594	13	617347881	617356031	8.151	3	IWB57659|IWB52804|IWB39570
H1595	13	619682298	619685415	3.118	3	IWB912|IWB35863|IWB35862
H1596	13	633844049	633863609	19.561	3	IWB46500|IWB50222|IWB33084
H1597	13	656935865	656943045	7.181	3	IWA4239|IWA4238|IWB3299
H1598	13	657047589	657181033	133.445	4	IWB59148|IWB11420|IWB2189|IWA821
H1599	13	659712556	659725816	13.261	3	IWB50828|IWB50829|IWB69711
H1600	13	665471459	665473803	2.345	2	IWB3232|IWB27941
H1601	13	666228726	666230671	1.946	2	IWB59300|IWB65128
H1602	13	666932153	666932263	0.111	2	IWB29170|IWB29171
H1603	13	670407171	670409124	1.954	3	IWA1214|IWB35325|IWA4223
H1604	13	670819709	670820035	0.327	2	IWB55699|IWB21632
H1605	13	677631886	677631965	0.08	2	IWB11221|IWB6827
H1606	13	679489793	679665043	175.251	7	IWB56756|IWB47623|IWB47624|IWB54919|IWB69108|IWA7491|IWA2839
H1607	13	680208789	680209938	1.15	2	IWB5178|IWB4543
H1608	13	703398367	703398370	0.004	2	IWB10387|IWB10388
H1609	13	706538644	706541330	2.687	4	IWB33010|IWB235|IWB27442|IWB58487
H1610	13	708418332	708441405	23.074	6	IWA2558|IWB10158|IWB45638|IWB41078|IWB20135|IWB23682
H1611	14	2239197	2244027	4.831	2	IWB587|IWB65796
H1612	14	2271375	2273308	1.934	2	IWB62408|IWB3288
H1613	14	2274782	2276032	1.251	3	IWB27708|IWB66057|IWB65389
H1614	14	8166634	8353164	186.531	5	IWB8814|IWB75279|IWB25182|IWB25183|IWB12199
H1615	14	8910589	8918362	7.774	5	IWB28542|IWB28540|IWB47271|IWB64852|IWB64851
H1616	14	10265173	10445153	179.981	6	IWB6119|IWB24594|IWB68150|IWB68149|IWB7137|IWB11318
H1617	14	10801870	10801870	0.001	2	IWB266|IWB267
H1618	14	10888795	10888795	0.001	2	IWB29181|IWB50354
H1619	14	13178829	13190663	11.835	3	IWB5930|IWB2028|IWB28730
H1620	14	13428117	13428126	0.01	2	IWB71482|IWB5257
H1621	14	16002467	16035102	32.636	5	IWB45635|IWB54140|IWB9625|IWB62267|IWB30025
H1622	14	19438710	19439455	0.746	3	IWB46856|IWB43086|IWB69079
H1623	14	21182687	21184516	1.83	2	IWB73191|IWA420
H1624	14	21534954	21538478	3.525	4	IWB71492|IWB21137|IWB4020|IWB8869
H1625	14	21749459	21751117	1.659	4	IWB40478|IWB62041|IWB59963|IWB6235
H1626	14	24313895	24357500	43.606	5	IWB41424|IWB54525|IWB38696|IWB26368|IWB48684
H1627	14	26450003	26450371	0.369	3	IWB4335|IWB14983|IWB8553
H1628	14	26950939	26951148	0.21	4	IWB14163|IWA1144|IWB14332|IWA1143
H1629	14	27806305	27830588	24.284	3	IWB35367|IWB7252|IWB44129
H1630	14	37705330	37705576	0.247	2	IWB29734|IWB52869
H1631	14	47576529	47586773	10.245	4	IWB7411|IWB36148|IWB34551|IWB9125
H1632	14	53657783	53662672	4.89	4	IWB67782|IWA7254|IWB50649|IWB43553
H1633	14	55340315	55340439	0.125	2	IWB70942|IWB70940
H1634	14	55492411	55624691	132.281	7	IWB5977|IWB56578|IWB58508|IWA7300|IWB47775|IWB51376|IWB20311
H1635	14	58563866	58565816	1.951	3	IWB21702|IWB59668|IWB21704
H1636	14	59159786	59160149	0.364	2	IWA1084|IWB72886
H1637	14	63362199	63363488	1.29	2	IWB37078|IWB34566
H1638	14	68358991	68366130	7.14	3	IWB3670|IWB27562|IWB29384
H1639	14	69562709	69648217	85.509	4	IWB3333|IWB29856|IWA7217|IWB22696
H1640	14	72007967	72018818	10.852	2	IWB58756|IWB37489
H1641	14	74336357	74337135	0.779	2	IWB39434|IWB39433
H1642	14	78732485	78735572	3.088	2	IWB47570|IWB53995
H1643	14	123755428	123760346	4.919	3	IWB15045|IWB10259|IWB8411
H1644	14	133592147	133660239	68.093	4	IWA1770|IWA8193|IWB49207|IWB11251
H1645	14	139166678	139167711	1.034	2	IWB34894|IWA8260
H1646	14	141454755	141455050	0.296	3	IWB34808|IWB59842|IWA7096
H1647	14	141893861	141950994	57.134	4	IWB54002|IWB8358|IWB23041|IWA7774
H1648	14	234906022	234907050	1.029	3	IWB6617|IWB42870|IWB29582
H1649	14	236074676	236261479	186.804	4	IWB40108|IWB60973|IWB8594|IWB54175
H1650	14	236286283	236289084	2.802	5	IWB38575|IWB39138|IWB39139|IWB39140|IWB34843
H1651	14	238658981	238663284	4.304	4	IWB38171|IWB22916|IWB25908|IWB23504
H1652	14	239308367	239437366	129	10	IWB28656|IWB42303|IWB42302|IWA7307|IWB47809|IWB29746|IWB10779|IWB20683|IWB20682|IWB11231
H1653	14	240595592	240599282	3.691	3	IWB45167|IWB45166|IWB45165
H1654	14	275017286	275034497	17.212	2	IWB39949|IWB29025
H1655	14	281675522	281675808	0.287	2	IWB44044|IWB34667
H1656	14	316369112	316532533	163.422	4	IWB56814|IWB49807|IWB46310|IWA1155
H1657	14	317297578	317312257	14.68	4	IWB42305|IWA7372|IWB31404|IWB30934
H1658	14	321217800	321416655	198.856	5	IWB34529|IWB37883|IWB62586|IWB37798|IWB35163
H1659	14	321635374	321636779	1.406	4	IWB55018|IWB51970|IWA7318|IWB44948
H1660	14	323883110	323891372	8.263	6	IWB12549|IWB47295|IWB35388|IWB49410|IWB39846|IWB49857
H1661	14	326912959	327080489	167.531	4	IWB9396|IWB64551|IWB8398|IWB8397
H1662	14	343833250	343833263	0.014	2	IWB40051|IWB40050
H1663	14	357103433	357122519	19.087	7	IWB6899|IWA7272|IWB58307|IWB49093|IWB20644|IWB35584|IWB7200
H1664	14	403547260	403713955	166.696	4	IWA8518|IWB64495|IWB36269|IWB36090
H1665	14	403782839	403855798	72.96	4	IWB61438|IWB36619|IWB36620|IWB61296
H1666	14	404184146	404189680	5.535	4	IWB3456|IWB28171|IWA7127|IWB8223
H1667	14	410532035	410535510	3.476	3	IWA123|IWB11100|IWB62611
H1668	14	411813861	411947554	133.694	4	IWB35110|IWB35487|IWB6112|IWB28745
H1669	14	415649122	415801133	152.012	5	IWB71912|IWB43528|IWB71914|IWB71913|IWB45956
H1670	14	417438409	417443645	5.237	2	IWB74498|IWB70171
H1671	14	428125758	428129663	3.906	2	IWB40550|IWB8285
H1672	14	431798237	431798678	0.442	3	IWB21069|IWB21067|IWA6979
H1673	14	442376290	442376701	0.412	2	IWB69617|IWB36033
H1674	14	455734242	455738725	4.484	8	IWB56529|IWB7839|IWB44555|IWB28346|IWA8343|IWA7507|IWB35913|IWB5781
H1675	14	457122746	457132585	9.84	3	IWB33430|IWB34553|IWB34844
H1676	14	457342540	457396663	54.124	4	IWB3560|IWB3561|IWB19922|IWB19921
H1677	14	460677170	460678366	1.197	3	IWB24023|IWB40369|IWB40368
H1678	14	461137104	461303546	166.443	5	IWB65250|IWB7225|IWB44988|IWB7361|IWB7880
H1679	14	466000024	466173987	173.964	6	IWB24354|IWB35123|IWB323|IWB38085|IWB42557|IWB42558
H1680	14	473114456	473178537	64.082	5	IWB35550|IWB35553|IWA7165|IWB61577|IWB38216
H1681	14	473878709	473879155	0.447	4	IWB5390|IWB40315|IWB72937|IWB40314
H1682	14	476447102	476636668	189.567	4	IWB53234|IWB1974|IWA7636|IWA3985
H1683	14	476797852	476805518	7.667	4	IWB52780|IWA4074|IWB40681|IWB57415
H1684	14	478126565	478130055	3.491	4	IWB32971|IWB38179|IWB38177|IWB38178
H1685	14	479193647	479389859	196.213	8	IWB44183|IWB55646|IWB73111|IWB73110|IWB66469|IWB72579|IWB45663|IWB72578
H1686	14	479500818	479635088	134.271	4	IWB57882|IWB21641|IWB57484|IWB6817
H1687	14	480160372	480163730	3.359	3	IWB66311|IWB48223|IWB73416
H1688	14	483000099	483014022	13.924	4	IWA7795|IWB48132|IWA4222|IWB53551
H1689	14	488016239	488106743	90.505	6	IWB13544|IWB52933|IWB52934|IWB6087|IWB36260|IWB6041
H1690	14	496486124	496529223	43.1	4	IWB13480|IWB29076|IWB33429|IWB57467
H1691	14	497756742	497936902	180.161	4	IWB13748|IWB14465|IWB13064|IWB65273
H1692	14	498266215	498282138	15.924	3	IWB10247|IWB24630|IWB27412
H1693	14	498883434	498887863	4.43	4	IWB5882|IWB30916|IWB30915|IWB12958
H1694	14	499084514	499168189	83.676	6	IWB29046|IWB36743|IWB22902|IWB57006|IWB41056|IWB41057
H1695	14	499385181	499385218	0.038	3	IWB6250|IWB36296|IWB6298
H1696	14	501477542	501480729	3.188	6	IWB54186|IWB56863|IWB33326|IWB41830|IWB9341|IWB9342
H1697	14	501957346	502152795	195.45	6	IWB35031|IWB6875|IWB25731|IWB7248|IWB11793|IWB56744
H1698	14	503093878	503218414	124.537	7	IWB43269|IWB47723|IWB45206|IWB49588|IWB43276|IWB35262|IWB37896
H1699	14	505482007	505484211	2.205	6	IWB11926|IWB29629|IWA7513|IWB50224|IWB29628|IWB70030
H1700	14	505805807	505808108	2.302	9	IWB36688|IWB1429|IWB11517|IWB11518|IWB4268|IWB26130|IWA7983|IWB42683|IWB35288
H1701	14	506269983	506275519	5.537	7	IWB29182|IWB64115|IWB34828|IWB5272|IWB24427|IWB41178|IWB36211
H1702	14	506506031	506513407	7.377	6	IWB33412|IWA7484|IWB6352|IWB54035|IWB11548|IWB11549
H1703	14	506768302	506956615	188.314	12	IWB24440|IWB5999|IWB12125|IWB30865|IWB30864|IWB23532|IWB45619|IWB6326|IWA5947|IWB11733|IWB1722|IWA7446
H1704	14	507588140	507705866	117.727	4	IWB12080|IWB7342|IWB12864|IWB14185
H1705	14	508256899	508267469	10.571	4	IWB10096|IWB10095|IWB58869|IWB39040
H1706	14	508778825	508795454	16.63	2	IWB44310|IWB4904
H1707	14	508795461	508797392	1.932	2	IWA7776|IWB10204
H1708	14	510294544	510294778	0.235	3	IWB13996|IWA952|IWA951
H1709	14	510375080	510559188	184.109	5	IWB47552|IWA7844|IWB12273|IWB27476|IWB27475
H1710	14	510704993	510883917	178.925	6	IWB56137|IWB75267|IWB3227|IWB75266|IWB35140|IWB3112
H1711	14	511307361	511396935	89.575	4	IWB9615|IWB36|IWB23288|IWB23287
H1712	14	511696119	511697392	1.274	6	IWB74928|IWB29101|IWB74929|IWB21935|IWB4087|IWB4088
H1713	14	513605681	513608076	2.396	8	IWB33260|IWB47925|IWB49939|IWB36481|IWB35598|IWB52612|IWB49998|IWA7471
H1714	14	514929621	514932500	2.88	4	IWB3498|IWA5672|IWB24989|IWB47342
H1715	14	515184223	515197343	13.121	7	IWB24761|IWB63454|IWB30706|IWB27512|IWB12028|IWB36044|IWB6891
H1716	14	515578771	515579414	0.644	3	IWA8167|IWB30840|IWB30701
H1717	14	516030923	516042586	11.664	3	IWB35252|IWB4275|IWB63917
H1718	14	516469151	516469250	0.1	2	IWB11567|IWB72334
H1719	14	517776517	517867752	91.236	5	IWB9909|IWB23704|IWA3105|IWB60055|IWB24562
H1720	14	518956555	519153286	196.732	10	IWB4354|IWB57836|IWB1083|IWB1084|IWB34961|IWB33476|IWB55612|IWB47219|IWB54772|IWB54773
H1721	14	520875704	520898591	22.888	10	IWB11306|IWB7132|IWB59471|IWB13747|IWB20926|IWB20925|IWB27613|IWB20967|IWB10904|IWB10903
H1722	14	523186464	523215358	28.895	4	IWB51263|IWB35898|IWB26666|IWB60951
H1723	14	526576540	526589654	13.115	4	IWB6302|IWB11214|IWB34489|IWB9003
H1724	14	528572988	528705127	132.14	5	IWB36447|IWB10479|IWB36459|IWB63903|IWB48402
H1725	14	530231420	530234052	2.633	3	IWB29576|IWB60155|IWB8427
H1726	14	530973763	531153613	179.851	5	IWB36827|IWB30068|IWB60388|IWB62712|IWB11927
H1727	14	531199416	531219712	20.297	3	IWB5301|IWB3630|IWB7364
H1728	14	531404699	531599529	194.831	6	IWB71073|IWB50323|IWB4207|IWB34364|IWB4205|IWB4204
H1729	14	531625826	531642691	16.866	3	IWB31287|IWB982|IWB68790
H1730	14	533494556	533507927	13.372	3	IWB25709|IWB41225|IWB28925
H1731	14	536047052	536051354	4.303	3	IWB10834|IWA7378|IWB30911
H1732	14	545798193	545800959	2.767	4	IWB51987|IWB49599|IWB41756|IWB19792
H1733	14	546703936	546830916	126.981	6	IWB36366|IWB14942|IWB69120|IWB3660|IWB74319|IWB74320
H1734	14	547655457	547760288	104.832	4	IWB71102|IWB71101|IWB71099|IWB23159
H1735	14	548196457	548198142	1.686	4	IWB30121|IWB2079|IWB42678|IWB72095
H1736	14	548341474	548528165	186.692	6	IWB24695|IWB1762|IWB45680|IWB27388|IWB41910|IWB1272
H1737	14	549947821	549953366	5.546	3	IWA8097|IWB20349|IWB46363
H1738	14	550211526	550395326	183.801	11	IWB44719|IWB12092|IWB52918|IWB27651|IWB11477|IWB60905|IWB8527|IWB13523|IWB61049|IWB33372|IWB56720
H1739	14	550728917	550732899	3.983	4	IWB66356|IWB6687|IWB11522|IWB70159
H1740	14	550847392	550851142	3.751	2	IWB25366|IWB55478
H1741	14	551499488	551663049	163.562	4	IWB10362|IWB6830|IWB6862|IWB5738
H1742	14	554210219	554212757	2.539	2	IWB3083|IWB38237
H1743	14	554820366	555011203	190.838	5	IWB23950|IWB46909|IWB49876|IWB55120|IWA7735
H1744	14	555177049	555185141	8.093	5	IWB71533|IWB61245|IWB53035|IWB10635|IWB9783
H1745	14	558022357	558119979	97.623	4	IWB68594|IWB73983|IWB10357|IWB10356
H1746	14	558405292	558418385	13.094	3	IWB66419|IWB54191|IWB69759
H1747	14	562968814	562969783	0.97	3	IWB57597|IWB10021|IWB6202
H1748	14	565898728	565898744	0.017	2	IWB50957|IWB10018
H1749	14	566504746	566687976	183.231	4	IWB31083|IWB29205|IWB34530|IWB47298
H1750	14	566968394	567156825	188.432	7	IWB70720|IWB34332|IWB55063|IWB39412|IWB23151|IWB6023|IWB43740
H1751	14	571184007	571204807	20.801	7	IWB48019|IWB70387|IWB6852|IWB35621|IWB35127|IWB25936|IWB40925
H1752	14	572342444	572358522	16.079	3	IWB69318|IWB14635|IWA4057
H1753	14	577228726	577308403	79.678	13	IWB11342|IWB34518|IWB58682|IWB34511|IWB2787|IWB2786|IWB32852|IWB21097|IWB35480|IWA7733|IWA7732|IWB51408|IWB22029
H1754	14	580085162	580103343	18.182	2	IWB29442|IWA7910
H1755	14	583178260	583179086	0.827	4	IWB60268|IWB49340|IWB11984|IWB46235
H1756	14	587126764	587127255	0.492	3	IWB43739|IWB36364|IWB64098
H1757	14	591482249	591486810	4.562	5	IWB69506|IWB33771|IWB46652|IWB31382|IWB31383
H1758	14	591653347	591836102	182.756	7	IWB21982|IWB7043|IWB11132|IWB44209|IWB41594|IWB13019|IWB74092
H1759	14	594745399	594913782	168.384	6	IWA7668|IWB4875|IWB35989|IWB54309|IWB30646|IWB7213
H1760	14	595653433	595662052	8.62	3	IWB68074|IWB68076|IWB7405
H1761	14	597220586	597300794	80.209	7	IWB59550|IWB59549|IWB48703|IWB7930|IWB7931|IWB25600|IWB7633
H1762	14	601326991	601419435	92.445	6	IWB44945|IWB71812|IWB9699|IWB64530|IWB73702|IWB68822
H1763	14	602138778	602139065	0.288	4	IWB5242|IWB73547|IWB63594|IWB73546
H1764	14	603636547	603641839	5.293	4	IWB29397|IWA7478|IWA7872|IWB50044
H1765	14	603881835	604068254	186.42	9	IWB68185|IWB68186|IWB6889|IWB11915|IWB71390|IWB71391|IWB73165|IWB71825|IWB71849
H1766	14	607474077	607487196	13.12	5	IWB28146|IWB53460|IWB47520|IWB61848|IWB30577
H1767	14	607870762	607876319	5.558	4	IWB64503|IWB30048|IWB64501|IWB64502
H1768	14	612675864	612682909	7.046	4	IWB23110|IWB25614|IWB41092|IWB12030
H1769	14	617139943	617142015	2.073	3	IWB40362|IWB72592|IWB1546
H1770	14	617819197	617820813	1.617	2	IWB73678|IWB33134
H1771	14	620018534	620019512	0.979	2	IWB58545|IWB9430
H1772	14	622040657	622066631	25.975	3	IWB73902|IWB4062|IWB4061
H1773	14	622555896	622737101	181.206	8	IWB63298|IWB69025|IWB42855|IWB3699|IWA4182|IWA4183|IWA4184|IWA7393
H1774	14	631026861	631027472	0.612	3	IWB1100|IWB1101|IWB26630
H1775	14	636598170	636654402	56.233	6	IWB61903|IWB58404|IWB61902|IWB61901|IWA7966|IWA7585
H1776	14	638397220	638508728	111.509	4	IWB5765|IWB37513|IWB7359|IWB12143
H1777	14	649402745	649405827	3.083	3	IWB64707|IWB71437|IWB43331
H1778	14	650016132	650164406	148.275	6	IWB73815|IWB73814|IWB73816|IWB72680|IWB72681|IWB72503
H1779	14	652632862	652634993	2.132	4	IWB7105|IWB72666|IWB72667|IWB7744
H1780	14	653655509	653808560	153.052	4	IWB12511|IWB6980|IWB71387|IWB73499
H1781	14	656232656	656260275	27.62	14	IWB11821|IWB61496|IWB11822|IWB26068|IWB26067|IWB26172|IWB6771|IWB48837|IWB57384|IWB41502|IWB35088|IWB6568|IWB35694|IWB41501
H1782	14	657711648	657884265	172.618	6	IWB36112|IWB40558|IWB11343|IWB36173|IWB8264|IWB59195
H1783	14	658369997	658454515	84.519	12	IWB8582|IWB8583|IWB49556|IWB47938|IWB11985|IWB73522|IWB73523|IWB2969|IWB73524|IWB73525|IWB73526|IWB73527
H1784	14	662028459	662030456	1.998	4	IWA8031|IWB52362|IWA7340|IWB71624
H1785	14	669896518	669897891	1.374	7	IWB71488|IWB59686|IWB71489|IWB71490|IWB59687|IWB71491|IWB59688
H1786	14	670828797	670829749	0.953	3	IWB11392|IWB6924|IWB22976
H1787	14	670829816	670831144	1.329	2	IWB22974|IWB7873
H1788	14	671093739	671095023	1.285	4	IWB29005|IWB32871|IWB35817|IWA196
H1789	14	671192911	671356325	163.415	4	IWB38821|IWB46778|IWB44440|IWB10948
H1790	14	672594640	672594804	0.165	3	IWB34960|IWB13284|IWA936
H1791	14	678338269	678515585	177.317	4	IWB53343|IWB53341|IWB2049|IWB8870
H1792	14	678659569	678663819	4.251	2	IWB7719|IWB34210
H1793	14	679132388	679134266	1.879	8	IWB22900|IWB54503|IWB43433|IWB23282|IWB6454|IWB43430|IWB43431|IWB43432
H1794	14	679347175	679354739	7.565	5	IWA4635|IWB4219|IWA4634|IWB54873|IWB11035
H1795	14	680603460	680605468	2.009	3	IWB55382|IWB55378|IWB55381
H1796	14	683143110	683143220	0.111	2	IWB38705|IWB56115
H1797	14	684612172	684762978	150.807	4	IWB45135|IWB41664|IWB73021|IWB28883
H1798	14	691129115	691140977	11.863	3	IWB7917|IWB1548|IWB10756
H1799	14	692017709	692216290	198.582	4	IWB971|IWB45889|IWB134|IWB23043
H1800	14	692562656	692635714	73.059	8	IWB65054|IWB65055|IWB73941|IWB40755|IWB40758|IWB40759|IWB40748|IWB40750
H1801	14	692635783	692636123	0.341	5	IWB40751|IWA3360|IWB40752|IWB40753|IWA3359
H1802	14	694519049	694693887	174.839	6	IWB71272|IWB4410|IWB64061|IWB61646|IWA8006|IWB25477
H1803	14	696176328	696189503	13.176	3	IWB60548|IWB2735|IWB64287
H1804	14	697614344	697682961	68.618	4	IWB10359|IWB41960|IWB41961|IWB41962
H1805	14	697683526	697683597	0.072	2	IWB72713|IWB72712
H1806	14	700232214	700234582	2.369	4	IWB24047|IWB24048|IWB73046|IWB36771
H1807	14	701152780	701189685	36.906	8	IWB35835|IWB24417|IWB24418|IWB74021|IWB26990|IWB26989|IWB26744|IWB7836
H1808	14	701457474	701461793	4.32	8	IWB54996|IWB68112|IWB54995|IWB68114|IWB11982|IWB11983|IWB638|IWB73675
H1809	14	707131959	707134618	2.66	3	IWB61614|IWB35866|IWB73829
H1810	14	711584158	711592772	8.615	2	IWB42485|IWB29164
H1811	14	711598671	711702479	103.809	7	IWB29548|IWB59314|IWB24987|IWB47085|IWB26850|IWB47091|IWB47087
H1812	14	734130091	734131045	0.955	2	IWA4259|IWA6173
H1813	15	26791008	26792083	1.076	2	IWB26051|IWB26052
H1814	15	30116435	30116964	0.53	3	IWB65602|IWB61904|IWA4069
H1815	15	50485268	50488709	3.442	2	IWB64981|IWB64980
H1816	15	52255721	52257213	1.493	2	IWA8400|IWB16728
H1817	15	52615044	52616640	1.597	4	IWB34705|IWB58507|IWB58506|IWB20310
H1818	15	188336385	188337772	1.388	5	IWB18686|IWB56457|IWB58605|IWB55915|IWB55914
H1819	15	253183153	253184544	1.392	2	IWB59554|IWB33118
H1820	15	290394523	290394641	0.119	2	IWB3948|IWB2909
H1821	15	367690259	367692159	1.901	2	IWB34380|IWB29241
H1822	15	369387929	369388362	0.434	3	IWB27622|IWB59820|IWB59821
H1823	15	370468305	370468899	0.595	3	IWB3647|IWB60311|IWB61026
H1824	15	396808536	396815958	7.423	2	IWB24460|IWB46415
H1825	15	414067182	414247745	180.564	4	IWB6307|IWB33523|IWB33286|IWB33285
H1826	15	423071124	423270428	199.305	5	IWB43248|IWB34776|IWB6434|IWB13954|IWB18292
H1827	15	428595518	428595524	0.007	2	IWB66909|IWB66910
H1828	15	436801671	436951484	149.814	4	IWB34430|IWB36091|IWB5915|IWB59362
H1829	15	437344227	437345411	1.185	3	IWB44283|IWB20505|IWB31214
H1830	15	473795051	473796444	1.394	2	IWB9808|IWA8320
H1831	15	482293741	482299417	5.677	2	IWB56103|IWA7791
H1832	15	538166062	538166105	0.044	4	IWB37298|IWB2993|IWB30283|IWB2992
H1833	15	538765140	538765332	0.193	2	IWB58551|IWB6659
H1834	15	542660098	542699012	38.915	4	IWB17228|IWB25660|IWB30440|IWB23819
H1835	15	542991775	543058088	66.314	5	IWB18153|IWB4550|IWB14014|IWA7071|IWB538
H1836	15	543836329	543836638	0.31	2	IWB42166|IWB57677
H1837	15	544697265	544698107	0.843	2	IWB37841|IWB22168
H1838	15	546652167	546652673	0.507	2	IWB11094|IWB53671
H1839	15	546679816	546864019	184.204	13	IWB12263|IWB28510|IWB40408|IWB37468|IWB47729|IWB3368|IWB35632|IWB11570|IWB19299|IWB46497|IWB42724|IWB23845|IWB10643
H1840	15	546906400	546921418	15.019	4	IWB26308|IWB24735|IWB24734|IWB24648
H1841	15	547273468	547273861	0.394	4	IWB14533|IWB14381|IWB6473|IWB6872
H1842	15	548351262	548525686	174.425	11	IWB935|IWB40756|IWB30054|IWB46237|IWB17362|IWB39573|IWB22335|IWB51496|IWB51498|IWB41252|IWB17884
H1843	15	548869366	548942086	72.721	4	IWB18918|IWB7212|IWB49205|IWB19449
H1844	15	549576105	549579051	2.947	3	IWB39469|IWB45525|IWB11591
H1845	15	549770596	549857003	86.408	6	IWB27155|IWB41284|IWB34358|IWA8331|IWB40526|IWB36118
H1846	15	550442003	550511025	69.023	4	IWB11346|IWB7302|IWB6582|IWB6998
H1847	15	552697749	552711350	13.602	2	IWB10288|IWB57210
H1848	15	553907694	553908762	1.069	2	IWB30565|IWB66257
H1849	15	555046489	555065475	18.987	3	IWB1439|IWB60274|IWB7867
H1850	15	559922017	559922411	0.395	2	IWB6498|IWB11863
H1851	15	561673768	561675779	2.012	3	IWB57018|IWB42481|IWB42483
H1852	15	561703539	561707114	3.576	2	IWB21790|IWB6523
H1853	15	562062900	562121917	59.018	6	IWB65233|IWB65232|IWB10494|IWB6844|IWB11400|IWB49046
H1854	15	562340963	562487467	146.505	4	IWB74263|IWB74264|IWB8973|IWB30174
H1855	15	562651110	562833207	182.098	11	IWB22653|IWB1633|IWB36040|IWB46742|IWA4113|IWA4561|IWB45923|IWB47755|IWB47754|IWB1289|IWB25292
H1856	16	636843	639333	2.491	2	IWB4181|IWB11274
H1857	16	1497430	1500459	3.03	5	IWB53755|IWB53750|IWB35508|IWB53752|IWB23313
H1858	16	2233691	2402510	168.82	6	IWB60891|IWB14763|IWB30834|IWA2635|IWB21196|IWB59591
H1859	16	3687937	3852843	164.907	5	IWB11959|IWB22036|IWB22702|IWB12517|IWB5029
H1860	16	4420143	4424630	4.488	2	IWB65434|IWB71361
H1861	16	4427440	4427440	0.001	2	IWB20143|IWB48751
H1862	16	5326278	5327373	1.096	7	IWB26415|IWB52139|IWB67416|IWB58271|IWB67415|IWB67414|IWB67413
H1863	16	5873096	5873728	0.633	3	IWB49090|IWB60249|IWB39353
H1864	16	6596817	6596868	0.052	2	IWB72428|IWB72429
H1865	16	6725111	6725171	0.061	2	IWB23521|IWB23519
H1866	16	6732737	6733450	0.714	5	IWB43805|IWB64917|IWB43809|IWB72958|IWB72957
H1867	16	8002197	8002448	0.252	2	IWB72510|IWB2886
H1868	16	9327835	9328127	0.293	3	IWB46303|IWB1550|IWB11976
H1869	16	10493728	10560416	66.689	5	IWB31824|IWB31479|IWB29603|IWB55386|IWB48667
H1870	16	10919202	11114856	195.655	4	IWB55188|IWB51436|IWB44867|IWB44866
H1871	16	11159002	11168992	9.991	2	IWB48335|IWB28421
H1872	16	11588281	11588640	0.36	2	IWB63697|IWB63696
H1873	16	12387925	12392149	4.225	3	IWB43173|IWB53141|IWB28338
H1874	16	13071594	13076572	4.979	11	IWB3722|IWB12262|IWB12261|IWB56165|IWB26293|IWB7777|IWB49922|IWB63355|IWA4152|IWA7457|IWB20556
H1875	16	16570676	16571211	0.536	2	IWB38095|IWB27480
H1876	16	18704912	18713343	8.432	12	IWB7337|IWB57376|IWB11955|IWB43021|IWB29014|IWB54795|IWB67936|IWB29624|IWB29623|IWB67934|IWB6327|IWB67933
H1877	16	20767756	20767785	0.03	2	IWB33795|IWB33796
H1878	16	21519121	21707066	187.946	8	IWB74665|IWB10775|IWB10776|IWB11433|IWB73288|IWB73287|IWB73286|IWB7568
H1879	16	22524450	22694000	169.551	6	IWB41785|IWB36242|IWB71874|IWB58142|IWB44659|IWB8366
H1880	16	23356506	23372012	15.507	6	IWB24037|IWB12604|IWB7009|IWB24036|IWB8946|IWB9442
H1881	16	23410152	23602570	192.419	8	IWB7199|IWB40518|IWB11794|IWB247|IWB10563|IWB27452|IWB1857|IWB36020
H1882	16	23723130	23876277	153.148	5	IWB47595|IWB61585|IWB72039|IWA7286|IWB6509
H1883	16	24327386	24332184	4.799	2	IWB28140|IWB58843
H1884	16	24828583	24830043	1.461	2	IWB5910|IWB58955
H1885	16	26812813	27005857	193.045	5	IWB11844|IWB11845|IWB22389|IWB62193|IWB26280
H1886	16	30031050	30190370	159.321	5	IWB36291|IWB12513|IWB72983|IWB72984|IWB72985
H1887	16	30464250	30467774	3.525	7	IWB69175|IWB69176|IWB27926|IWB27927|IWB22945|IWB61592|IWB61593
H1888	16	31354392	31383049	28.658	6	IWB11722|IWB11723|IWB40242|IWB58326|IWB72839|IWB72838
H1889	16	32658129	32794730	136.602	14	IWB105|IWB71378|IWB73938|IWB73939|IWB39835|IWB3945|IWA7443|IWB73936|IWB39003|IWB73937|IWB32522|IWB70421|IWB7442|IWB10887
H1890	16	33953282	33955313	2.032	3	IWB72868|IWB49012|IWB49013
H1891	16	34285847	34303167	17.321	3	IWB24278|IWB25326|IWB64837
H1892	16	35545082	35637291	92.21	4	IWB72210|IWB71342|IWB71341|IWB71340
H1893	16	37407840	37452267	44.428	4	IWB13795|IWB29575|IWB49115|IWB60949
H1894	16	38432379	38442726	10.348	6	IWB42382|IWB29089|IWB29090|IWB29091|IWB29092|IWB29093
H1895	16	38470634	38553407	82.774	7	IWB4117|IWB53843|IWB41829|IWB53844|IWB3800|IWB31429|IWB36508
H1896	16	43275713	43275910	0.198	2	IWB49575|IWB22661
H1897	16	51399143	51409714	10.572	4	IWB36506|IWB73817|IWB7827|IWA1086
H1898	16	52019701	52019833	0.133	2	IWB34778|IWB21588
H1899	16	63303052	63303073	0.022	2	IWB9647|IWB9646
H1900	16	64166313	64314865	148.553	4	IWB38708|IWB35011|IWB19683|IWB20150
H1901	16	65066525	65140473	73.949	5	IWB6851|IWB56677|IWB7221|IWB63546|IWB63545
H1902	16	67642377	67642883	0.507	2	IWB25986|IWB63387
H1903	16	71067867	71089067	21.201	3	IWB13069|IWB10097|IWB10098
H1904	16	73572492	73724797	152.306	8	IWB34596|IWB40185|IWB34343|IWB38469|IWB24955|IWB12868|IWA731|IWB8442
H1905	16	73994310	73995155	0.846	3	IWB68255|IWB68254|IWB54444
H1906	16	74497266	74499372	2.107	3	IWA7237|IWB47355|IWB34654
H1907	16	77513390	77538695	25.306	7	IWB6293|IWB72207|IWB72208|IWB8016|IWB50999|IWB62261|IWB51699
H1908	16	77783952	77896011	112.06	4	IWB31439|IWB69990|IWB47011|IWB26140
H1909	16	82960449	82960935	0.487	3	IWB62585|IWB35519|IWB7808
H1910	16	103075344	103075776	0.433	2	IWA1693|IWA1694
H1911	16	183198745	183368853	170.109	4	IWB60607|IWB1960|IWB30219|IWB57942
H1912	16	228519194	228535846	16.653	2	IWB39455|IWB49990
H1913	16	230699170	230701247	2.078	3	IWB59402|IWB52105|IWB39414
H1914	16	270607927	270610337	2.411	2	IWB10590|IWB7420
H1915	16	297520540	297718691	198.152	6	IWB39584|IWB53776|IWB47942|IWB30734|IWB75148|IWB30735
H1916	16	381025660	381033765	8.106	4	IWB7526|IWB21080|IWB20844|IWB37679
H1917	16	432246804	432248136	1.333	3	IWA7940|IWB11484|IWB7175
H1918	16	442400428	442400757	0.33	3	IWB38062|IWB38061|IWB38060
H1919	16	447833393	447833850	0.458	2	IWB60499|IWB22698
H1920	16	454638958	454651233	12.276	2	IWB73438|IWA7431
H1921	16	454939670	455047340	107.671	4	IWB71835|IWB12269|IWB7421|IWB73396
H1922	16	497462218	497462367	0.15	2	IWB74245|IWB74244
H1923	16	498951230	499007803	56.574	4	IWB69|IWB33803|IWB59702|IWB52504
H1924	16	501176743	501224122	47.38	4	IWB6191|IWB36195|IWB8206|IWB75285
H1925	16	531388541	531522393	133.853	5	IWB35386|IWB11354|IWB11353|IWB33751|IWB10695
H1926	16	533242979	533412571	169.593	4	IWB43791|IWB60244|IWB6286|IWB42164
H1927	16	542232031	542232286	0.256	3	IWB71472|IWA1235|IWA651
H1928	16	542827980	542934498	106.519	4	IWA741|IWB15078|IWB74038|IWB34852
H1929	16	545112947	545127737	14.791	4	IWB7284|IWB41930|IWB33825|IWB11243
H1930	16	545828519	545832481	3.963	3	IWB70871|IWB70872|IWB67907
H1931	16	550073924	550074106	0.183	3	IWB71372|IWA4036|IWB71373
H1932	16	550738341	550738422	0.082	2	IWB69855|IWB36031
H1933	16	550955015	550955740	0.726	3	IWB20237|IWB50963|IWB50964
H1934	16	550958322	550960495	2.174	3	IWB63066|IWB39623|IWB38780
H1935	16	554691677	554822579	130.903	4	IWB75106|IWB55783|IWB42205|IWB50266
H1936	16	563558608	563742679	184.072	4	IWB69933|IWA992|IWB53065|IWB72440
H1937	16	564272692	564290962	18.271	3	IWB46921|IWA7397|IWA7575
H1938	16	564717925	564723695	5.771	2	IWB11206|IWB8308
H1939	16	565468100	565473171	5.072	4	IWA4112|IWB34819|IWA4111|IWA7063
H1940	16	568494476	568506977	12.502	5	IWB35530|IWB11268|IWB45254|IWB11269|IWB2540
H1941	16	570372569	570381170	8.602	4	IWB21410|IWB21409|IWB35052|IWB41326
H1942	16	574473314	574485977	12.664	3	IWB47346|IWB34395|IWB25252
H1943	16	578513923	578514204	0.282	4	IWB58127|IWB40509|IWB73414|IWB73413
H1944	16	579146146	579147747	1.602	4	IWB72746|IWB72747|IWB72744|IWB72745
H1945	16	581746544	581839902	93.359	5	IWB14092|IWB48473|IWA7366|IWB24380|IWB1810
H1946	16	584678556	584680439	1.884	2	IWB52833|IWB63308
H1947	16	585429568	585432194	2.627	2	IWB21617|IWB69370
H1948	16	585816810	585818368	1.559	2	IWB44122|IWB42224
H1949	16	586101585	586101913	0.329	2	IWB14335|IWB24482
H1950	16	591729122	591732019	2.898	4	IWB73985|IWB73986|IWB199|IWB24573
H1951	16	594748629	594753216	4.588	2	IWB64875|IWB69770
H1952	16	595610691	595627657	16.967	3	IWA7764|IWB31101|IWB12055
H1953	16	597351352	597356708	5.357	3	IWB12203|IWB63000|IWB50538
H1954	16	598635390	598635903	0.514	3	IWB73296|IWB2065|IWB2064
H1955	16	599035144	599046138	10.995	3	IWB5984|IWB73518|IWB5771
H1956	16	599046539	599050995	4.457	7	IWB35886|IWB71707|IWB33787|IWB71706|IWB71705|IWB54924|IWB71708
H1957	16	600275878	600276012	0.135	2	IWB72189|IWB72190
H1958	16	602623180	602710419	87.24	7	IWB69989|IWB69988|IWB69730|IWB62650|IWB62649|IWB57644|IWB4014
H1959	16	603093982	603094546	0.565	2	IWB50956|IWB5643
H1960	16	603194173	603298533	104.361	9	IWB53134|IWB1654|IWB5419|IWB11920|IWB11674|IWB11675|IWB71973|IWB28230|IWB34813
H1961	16	604877154	604886144	8.991	10	IWB64257|IWB64256|IWB64255|IWB64260|IWB33846|IWA8438|IWB64259|IWB34392|IWB64044|IWA8386
H1962	16	605231031	605231868	0.838	2	IWB61517|IWB24306
H1963	16	606964699	606979721	15.023	2	IWB74304|IWB28939
H1964	16	607958581	608117643	159.063	5	IWB56108|IWB2576|IWB3130|IWB74620|IWB29924
H1965	16	608968053	609021530	53.478	5	IWA4691|IWB31096|IWB11903|IWB41247|IWB55508
H1966	16	609256632	609452044	195.413	5	IWB36618|IWB37760|IWB23484|IWB31459|IWB30811
H1967	16	609452874	609453523	0.65	5	IWB21174|IWB21175|IWB31024|IWB35994|IWB43328
H1968	16	610199034	610349038	150.005	4	IWB64579|IWB60427|IWB113|IWB8248
H1969	16	611297380	611326309	28.93	3	IWB35468|IWB73609|IWB36445
H1970	16	611483414	611489606	6.193	3	IWB45780|IWB6437|IWA7386
H1971	16	611713013	611713222	0.21	2	IWB8323|IWB8322
H1972	16	611851330	611855600	4.271	2	IWB6725|IWB59418
H1973	16	612291984	612299763	7.78	3	IWB28388|IWB48491|IWB25447
H1974	16	613350249	613351855	1.607	2	IWB59179|IWB35061
H1975	16	613483890	613487091	3.202	2	IWA4165|IWB50034
H1976	16	614007958	614008635	0.678	2	IWB6359|IWB58370
H1977	16	614164347	614165788	1.442	4	IWB52371|IWB52370|IWB59855|IWB59858
H1978	16	615439107	615455262	16.156	4	IWB53602|IWB53601|IWB11445|IWB6503
H1979	16	615456120	615457734	1.615	5	IWA7498|IWB61365|IWB50129|IWB34398|IWB33599
H1980	16	615469013	615589167	120.155	6	IWB45981|IWB45980|IWB57517|IWB74644|IWA7908|IWB11258
H1981	16	616739597	616924092	184.496	6	IWB28016|IWB42127|IWB52668|IWB3791|IWB6490|IWB29615
H1982	16	617059214	617182650	123.437	4	IWB60698|IWB60696|IWB60697|IWB10991
H1983	17	163936	169581	5.646	6	IWA969|IWB42494|IWB42496|IWB7765|IWB63939|IWB1461
H1984	17	3026159	3026159	0.001	2	IWB52667|IWB90
H1985	17	3037379	3039020	1.642	2	IWB30223|IWB190
H1986	17	3887265	3888891	1.627	4	IWB71436|IWB60688|IWB71431|IWB71432
H1987	17	3889071	3889397	0.327	5	IWB29541|IWB29542|IWB71433|IWB71434|IWB71435
H1988	17	4316933	4318334	1.402	2	IWB60750|IWB24880
H1989	17	4383459	4383636	0.178	2	IWB65508|IWB31076
H1990	17	6628544	6628733	0.19	2	IWB11787|IWB3283
H1991	17	7099373	7099760	0.388	2	IWB6463|IWB56606
H1992	17	8420230	8420330	0.101	2	IWB56835|IWB72290
H1993	17	8778768	8781484	2.717	2	IWB7673|IWB59376
H1994	17	9003351	9036192	32.842	7	IWB6123|IWB5886|IWB5850|IWB36014|IWB415|IWB60100|IWB23395
H1995	17	10744863	10751294	6.432	2	IWB9057|IWB10964
H1996	17	11539157	11539903	0.747	2	IWB24997|IWB72322
H1997	17	15781175	15781777	0.603	3	IWB54722|IWB54721|IWB72988
H1998	17	17533779	17703514	169.736	4	IWB27152|IWB27151|IWB59677|IWB28186
[truncated: 478 more rows]

## Sheet: Table S3
Table S3: Marker-trait associations in different environments and their co-localization with divergent selections and/or functional genes.
					P value
Trait	Marker	Chr	MAF	Position	WW	WL	DIFF	Co-localization
GS	IWB45926	1A	0.435644	3258040	0.000677538			5.65e-12
CCI	IWB9746	1A	0.222772	551050619		1.52404e-05
CCI	IWB72768	3A	0.101485	4352727		6.00503e-05		7.78e-81
SFW	IWA5090	1A	0.326733	423661678	0.000183324
CCI	IWB21984	3B	0.0866337	39603457		9.05039e-06
CCI	IWB63113	3B	0.39604	611176702		2.36456e-08		4.67e-13
RWC	IWB64453	1A	0.247525	574338242	5.72766e-05		0.000439187	2.52e-23
SOD	IWB12340	1A	0.472772	581829047	8.86265e-05
CCI	IWB6756	4A	0.30198	24757405		1.57977e-05
CCI	IWB41634	5D	0.344059	544614652		9.4102e-09	2.51861e-05
PH	IWB50900	1B	0.440594	252267592			7.70647e-05	5.61e-11
Sugar	IWB28335	1B	0.490099	278473796			0.000657741
SOD	IWB52413	1B	0.306931	520785409			0.000219931
CCI	IWB45289	7A	0.309406	607556072		7.20663e-05		TaMoc1
Chl	IWB60066	1B	0.210396	608995889	1.58833e-05
GY	IWB49071	1B	0.121287	628053841	0.000629506			3.95e-47
GS	IWB62079	1B	0.403465	685723919	0.000597142			TaElf3-B1
TP	IWA3920	1B	0.195545	739712780	0.000892819			1.4e-31
CCI	IWB27075	7D	0.121287	627325333		2.64087e-07
Chl	IWB36330	1B	0.386139	17892275		0.000695662		6.31e-12
Chl	IWB58640	1D	0.165842	206310986		0.000588218
Chl	IWA4651	4B	0.188119	725661138		0.000729832
SFW	IWB2303	1D	0.329208	438369398	0.000405879			3.87e-17
Chl	IWB28688	4D	0.5	2306721		0.000394434
GY	IWB36297	2A	0.391089	31089688	0.000830162			0.00000000000155; Ppd-B1
GS	IWB10114	2A	0.128713	205192664	0.000441391
Chl	IWB1744	5A	0.274752	534083687		0.000767886		1.36e-20
PH	IWB9506	2A	0.10396	683578211			1.44013e-05
GY	IWA7876	2A	0.155941	723525913	0.000140091
TP	IWB26297	2A	0.180693	744283491	0.000588789
CCI	IWB62266	2A	0.45297	748964266	0.000360802
Chl	IWB7864	5B	0.336634	2559480		0.000396591
CTSpike	IWB37531	1A	0.0742574	9556706		2.10619e-05
GY	IWA6878	2B	0.490099	5448650	0.000869949
TP	IWB55737	2B	0.269802	11291328	0.000124893		0.000734611
SFW	IWA4251	2B	0.0891089	46124953			0.000375156	1.43e-84
GS	IWB51237	6B	0.257426	291778439		7.73531e-06	2.31741e-06
SOD	IWB63879	2B	0.356436	104574405			0.000882811
GS	IWB55521	7B	0.319307	43880890		2.11794e-05
GY	IWB72112	2A	0.477723	779818833		1.51772e-05
Proline	IWB56373	2B	0.0915842	546203236	8.56701e-05
RWC	IWA1339	2B	0.455446	644436875			0.000767996	Hap-2B-RWC2
CCI	IWB4935	2B	0.371287	654648827	0.000159639			Hap-2B-CCI1
GY	IWB24186	4A	0.247525	687548787		3.39012e-05		TaCwi-4A
RWC	IWB36141	2B	0.257426	747179924	2.69685e-10			TaGS2-B1
SOD	IWB61201	2D	0.492574	9856893			0.0008432
TP	IWA557	2D	0.334158	30061031	0.000527899			Ppd-D1
TP	IWB24243	2D	0.309406	71767150			0.00059331	3.87e-17
PH	IWA40	2D	0.0742574	440869216	1.00407e-06		2.29426e-07
GY	IWB61578	5D	0.0792079	393057411		1.26646e-06		1.95e-81
GS	IWB75018	3A	0.475248	8593525	0.000396264
GY	IWB1876	3A	0.403465	10830206	0.000298518		2.92703e-05
SFW	IWB401	3A	0.183168	12783840	0.000289277
RWC	IWB50434	3A	0.185644	13740044	1.26724e-10
CTSpike	IWB70655	3A	0.118812	34532072	4.17549e-05
PH	IWB8266	5A	0.329208	46232547		7.30242e-05
Proline	IWB61587	2A	0.269802	5267865		0.000406006	0.000279936	3.63e-21
TP	IWB5794	3A	0.311881	627254041	0.00048212			4.1e-17
GY	IWB11155	3A	0.314356	627825077	0.000273666
Proline	IWB48659	2B	0.287129	664219887		0.000676525		1.39e-18
SFW	IWB58773	3B	0.148515	985349			0.000861834
SFW	IWB31190	3B	0.264851	10761727			0.00046958
Proline	IWA1156	7A	0.232673	130613253		0.000383964	0.000446343
RWC	IWB2303	1D	0.329208	438369398	2.38831e-09	2.84159e-06		3.87e-17
GY	IWB30468	3B	0.277228	554034769	0.000198141
RWC	IWB40605	2B	0.220297	411517081		1.46909e-08
TP	IWB44662	3B	0.113861	730284749			0.000576754	2.38e-58
SL	IWB70345	3B	0.272277	750863431			3.11079e-05
TP	IWB7294	3B	0.381188	772399593	0.000402276
RWC	IWB31146	3B	0.168317	409545629		5.49456e-06		2.44e-37
RWC	IWB61562	3D	0.388614	6955053		2.01208e-05
SFW	IWB58167	3D	0.227723	23744932	0.000509367			Hap-3D-SFW;18.16E-26
TGW	IWB62158	3D	0.0841584	35340477	0.000898224			6.16e-83
SOD	IWB32715	3D	0.425743	38278181			0.000477876	1.64e-11
RWC	IWB50770	3D	0.277228	311662828		4.88356e-05		3.28e-19
RWC	IWB53305	5B	0.113861	327790108		6.27905e-08		1.06e-60
SDW	IWB32748	3D	0.222772	369799955	0.000157286
Sugar	IWB16116	3D	0.267327	394913968			0.000599355	2.2e-19
SFW	IWA7802	3D	0.0742574	441252566	0.000548345			3.72e-87
RWC	IWB13408	6A	0.0693069	542232293		3.93829e-06
PH	IWB20869	3D	0.0866337	539121144			4.73285e-05
TGW	IWB26400	3D	0.462871	610353094			0.000455504
GY	IWA6652	3D	0.331683	627819474	0.000681044
RWC	IWB43804	6D	0.25495	7104862		4.9017e-05
TP	IWB41940	4A	0.279703	2713402	0.000628846
TP	IWB1380	4A	0.237624	7136559			0.000303186
TGW	IWA1768	4A	0.39604	11347367			0.000193101
RWC	IWB43363	7A	0.0717822	705688072		2.99294e-06		Hap-7A-RWC1,1.53E-108
SFW	IWB61077	4A	0.10396	46128425			0.000800443
Chl	IWB23026	4A	0.0569307	566754000			8.74569e-05	9.53e-119
SDW	IWB75332	1D	0.212871	325672368		2.88519e-05		1.97e-27
SDW	IWB33249	5D	0.423267	4608766		6.47164e-05		6.26e-07
PH	IWB11154	4A	0.158416	713352080	1.52558e-05		4.57593e-05	Hap-4A-PH1
RWC	IWB54172	4B	0.136139	140898196	2.80799e-05			3.93e-53
PH	IWB47113	4B	0.0767327	291662650	4.43737e-05		6.91585e-05	Rht-B1
SOD	IWB38337	4B	0.19802	346200267			0.000709136
RWC	IWA6608	4B	0.470297	645124632			0.00089396
SDW	IWB15529	6D	0.304455	50743512		6.41131e-05		3.05e-17
SFW	IWB11543	1A	0.371287	512878328		6.17737e-05
TP	IWB39467	4D	0.126238	6023789			0.000899373	2.95e-53
SFW	IWA1728	4D	0.0866337	45340337			0.00029626
PH	IWB26551	4D	0.331683	405059092			1.73171e-05
TP	IWA3457	5A	0.141089	12849149	0.000343095			1.32e-52
SFW	IWA5594	3D	0.116337	782836300		6.64477e-05
TGW	IWB33339	5A	0.133663	51677875			0.000302525	1.14e-49
SDW	IWB54375	5A	0.403465	93198883			3.1357e-05
GY	IWB28391	5A	0.210396	504573755	0.000598666			Hap-5A-GY2
SFW	IWB63863	5A	0.0915842	685991984		6.84273e-06		3.44E-74; AWN
SFW	IWB59042	5B	0.10396	220817473		2.07522e-06
TP	IWB28556	5A	0.309406	620562185	0.000817105		0.00011388	Vrn-A1
SFW	IWB70528	5A	0.405941	685557688			0.000720186	6.6e-11
SFW	IWB18780	6D	0.398515	143644031		7.58334e-07		3.73e-12
SFW	IWB67174	7D	0.195545	3924400		8.6827e-06
SL	IWB48031	1B	0.336634	49886407		0.000198004
SL	IWA4073	1D	0.274752	8726971		0.000893324		8.14e-21
TP	IWB53305	5B	0.113861	327790108			0.000215075	1.06e-60
TGW	IWA304	5B	0.131188	530673779
SL	IWB48188	2A	0.262376	776290034		0.000181336
TP	IWB37513	5B	0.10396	638397263	0.000335115			7.56e-81
SL	IWB61861	2B	0.272277	69014963		0.00064053
PH	IWA1064	5D	0.232673	122205701			1.45433e-05
SL	IWB55762	6A	0.0990099	615780928		0.000314236
SOD	IWB61578	5D	0.0792079	393057411	2.5842e-05			1.95e-81
SL	IWB14155	6B	0.138614	715704473		0.000752067
SL	IWA1949	7A	0.306931	53051117		0.000877722
SL	IWB6450	7A	0.311881	712309084		0.000754008		6.65e-17
SDW	IWB48021	6A	0.0866337	641706	0.000387242
SFW	IWB64917	6A	0.0717822	6733001	0.000670011
SOD	IWB29553	3D	0.0891089	496676602		8.98052e-05
RWC	IWB24450	6A	0.279703	72973553	6.87058e-05
SOD	IWB4492	5D	0.0742574	394102098		5.51622e-05
Sugar	IWB20120	1A	0.0717822	224826985	6.45192e-05	0.000454055
TGW	IWB41326	6A	0.0668317	570381170	0.000216737		0.000180583
Sugar	IWB53805	3A	0.428218	513608135		0.000379109	0.000260072
Sugar	IWB56874	3D	0.455446	5889027		0.000374555
SFW	IWB71436	6B	0.405941	3887265			0.000331821
TGW	IWB42617	6B	0.116337	136528482			0.000339886
Sugar	IWB23415	5D	0.195545	549864711		0.000783207
TP	IWB28698	6B	0.101485	720455450	0.000145734
GS	IWB65463	6D	0.393564	2084845	0.000828615			6.23e-13
TP	IWB67756	6D	0.126238	3312598			0.000371848	4.21e-55
TGW	IWB15726	6D	0.111386	4698563			0.000106423
SFW	IWB60232	6D	0.482673	5987031			0.000425182
Sugar	IWB70872	6A	0.170792	545828799		0.000293347
RWC	IWA6289	6D	0.430693	32695542			0.000692015
TGW	IWB65286	2A	0.178218	553276150		0.000402907		TaCwi-A1
SOD	IWB74157	6D	0.358911	115020530			0.00051877
TGW	IWB6655	3A	0.10396	657945858		0.000329557		7.17e-86
TP	IWB61530	6D	0.0816832	242497179			0.00047441	9.21e-84
CTSpike	IWA3110	6D	0.155941	528604928	3.81306e-05			2.87e-52
TGW	IWA6550	6D	0.0643564	570380794			0.000565945
SDW	IWA272	7A	0.0742574	3852802	0.000305811			3.72e-87
SFW	IWA272	7A	0.0742574	3852802	0.000548345			3.72e-87
TP	IWB7088	7A	0.351485	30061857	0.000235399
TGW	IWB16311	3D	0.25	48365010		0.000650656
SL	IWB71735	7A	0.232673	67616024	6.07525e-05			TEF-7A
SFW	IWB34481	7A	0.0717822	84702267	0.00050393		0.000185672
TGW	IWB8919	5B	0.0940594	576923927	0.000727517	0.000190073		Vrn-B1
RWC	IWB41146	7A	0.460396	546041678	1.10285e-06
TGW	IWB58464	6A	0.0866337	38453171		0.000627596		3.03e-96
TGW	IWB5830	7A	0.185644	610497998			0.000366634
RWC	IWB29268	7A	0.455446	638710198			0.000503115
TGW	IWB15372	7D	0.24505	559459585		0.000334481		Hap-7D-TGW1
TP	IWB61466	1B	0.341584	520899317		0.000504453		8.57e-16
Proline	IWA5460	7A	0.269802	742466612	7.08584e-05
TGW	IWB43298	7B	0.460396	14714923			0.000622269
TP	IWA3583	2B	0.118812	535137547		0.000159165		6.75e-66
SOD	IWB55521	7B	0.319307	43880890			0.000211267
PH	IWB39247	7B	0.252475	482087971	2.7387e-05
RWC	IWB59470	7B	0.136139	516472755	1.14805e-12
TGW	IWB26634	7B	0.210396	554191509			0.000624748	Hap-7B-TGW3
RWC	IWB72124	7B	0.443069	644438851			0.000371596
RWC	IWA3125	7D	0.188119	417712	7.43565e-07
TP	IWB73711	3A	0.220297	57012959		0.000309178
CTSpike	IWB17211	7D	0.269802	10724930			5.08279e-05	5.09e-20
CCI	IWB17614	7D	0.465347	43036956	0.000714709
GS	IWB63738	7D	0.339109	101559053	0.000322386
PH	IWB29167	7D	0.190594	131651482			1.84459e-06
RWC	IWB9120	7D	0.460396	552954267			0.000561794
TP	IWB10457	4A	0.240099	690845337		0.000598104		4.7e-26
TP	IWB6762	5A	0.128713	535138119		0.000349708		Vrn-A1

## Sheet: Table S4
Table S4: QTL associated with haplotypes in different environments and their co-localization with divergent selections and/or functional genes.
Trait	Name	Chr	Position		SNPs	Haplotype	Hap seq	WW	WL	Diff	Co-localization
GY	Hap1A-GY-1	1A	12306177	12.3062	IWB7493|IWB27788	H14	CT		2.625e-06		1.16e-46
CCI	Hap1A-CCI-1	1A	545888549	545.889	IWB1856|IWB8040|IWB59500|IWB59501	H117	GCAC	2.609e-06
Chl	Hap1A-Chl-1	1A	574827524	574.828	IWB29684|IWB31676	H137	CG	8.217e-06			4.43e-89
Chl	Hap1B-Chl-1	1B	4320839	4.32084	IWB47800|IWB7122|IWB74219|IWB7791|IWB74221|IWB55606	H158	GATACT		7.932e-06
RWC	Hap1B-RWC-1	1B	9082105	9.08211	IWB6905|IWB8015	H160	AA	9.059e-06
PH	Hap1B-PH-1	1B	15166232	15.1662	IWB73359|IWB71509|IWB30826	H166	GCA		3.037e-06
PH	Hap1B-PH-1	1B	15166232	15.1662	IWB73359|IWB71509|IWB30826	H166	AAG		3.037e-06
GY	Hap1B-GY-1	1B	20589424	20.5894	IWB69805|IWB6520|IWB55143	H170	ACG		6.172e-06
RWC	Hap1B-RWC-2	1B	30730981	30.731	IWB53833|IWB59981	H172	TT	7.08e-06
RWC	Hap1B-RWC-3	1B	59456917	59.4569	IWB7638|IWB27824|IWB9695|IWB10703|IWB60705|IWA7117	H184	GCAACC	7.477e-07			1.22e-27
GS	Hap1B-GS-1	1B	548536105	548.536	IWB41967|IWB57391|IWB71351|IWB20648|IWB35192|IWB53061|IWB71352|IWB40124|IWB71353|IWB71354|IWB38882|IWB71355|IWB35474|IWB38883|IWB36985|IWB23054|IWB38843|IWB29015|IWB2605|IWB39431|IWB71347|IWB3191|IWB71530	H298	TTTTCTGCCAATTGGCGTGTCAG		2.681e-06
TGW	Hap1B-TGW-1	1B	570840968	570.841	IWB48255|IWA4091|IWA4090|IWB48254	H316	AGCT	9.436e-06			7.54e-19
SFW	Hap1B-SFW-1	1B	645571228	645.571	IWB29150|IWB12399|IWB29151|IWB1725|IWB66973|IWB36563|IWB12093|IWB63739	H362	CTTTAATG			9.244e-07	7.63e-31
SFW	Hap1B-SFW-1	1B	645571228	645.571	IWB29150|IWB12399|IWB29151|IWB1725|IWB66973|IWB36563|IWB12093|IWB63739	H362	TCCGGGCA			9.244e-07	7.63e-31
RWC	Hap1D-RWC-1	1D	85456	0.085456	IWB44730|IWB36720|IWB65421	H397	CCT	3.686e-07
RWC	Hap1D-RWC-1	1D	1901611	1.90161	IWB62610|IWB65755|IWB37339|IWB37340	H400	ATTT	5.45e-07
Sugar	Hap1D-Sugar-1	1D	10661637	10.6616	IWB35174|IWB26984	H408	GG			1.324e-06	2.22e-15
SDW	Hap2A-SDW-1	2A	31953248	31.9532	IWB11051|IWB11050|IWB56555|IWB63137|IWB63138	H499	TCAGT	8.332e-06			Ppd-A1
RWC	Hap2A-RWC-1	2A	41232496	41.2325	IWB52303|IWB52304|IWA4216|IWA4215|IWA4214|IWA4213	H504	ACTCCG		5.104e-06		Ppd-A1
PH	Hap2A-PH-1	2A	118446554	118.447	IWB21864|IWB21865	H528	TC		4.537e-06		Sus2-2A
PH	Hap2A-PH-2	2A	319042351	319.042	IWB10443|IWB10151	H542	CC		8.937e-06
CCI	Hap2A-CCI-1	2A	676231961	676.232	IWB57080|IWB12570|IWB12571|IWB7051|IWB11139|IWB10432|IWB10431|IWB64479|IWB8169	H578	CATTGCACC	5.006e-06
SFW	Hap2A-SFW-1	2A	709836654	709.837	IWB36062|IWB63030|IWB61803|IWB61802	H588	ATGA			2.865e-06
SFW	Hap2A-SFW-1	2A	709836654	709.837	IWB36062|IWB63030|IWB61803|IWB61802	H588	ATAG		8.352e-06
PH	Hap2A-PH-3	2A	712706867	712.707	IWB61342|IWB55873|IWB32363	H594	TGC		6.67e-09		1.56e-25
PH	Hap2A-PH-3	2A	712706867	712.707	IWB61342|IWB55873|IWB32363	H594	CAT		1.879e-08		1.56e-25
SDW	Hap2A-SDW-1	2A	754349336	754.349	IWB12358|IWB43502|IWB9045|IWB12196|IWB73906	H613	ATATA			8.998e-06
PH	Hap2B-PH-1	2B	5188368	5.18837	IWB28588|IWB67532	H635	GG	6.935e-21		3.717e-21
RWC	Hap2B-RWC-1	2B	7991987	7.99199	IWB63105|IWB27166	H641	CA	3.832e-06
GY	Hap2B-GY-1	2B	25021022	25.021	IWB35090|IWB47095|IWB39756	H657	TTT			3.752e-06
TGW	Hap2B-TGW-1	2B	65097688	65.0977	IWB67561|IWB10193|IWB55936|IWB55935|IWB21618|IWB43637|IWB59624|IWB72841|IWB72844|IWB72843|IWB72842	H684	GCCCCCATTAC	1.155e-06
PH	Hap2B-PH-2	2B	77170064	77.1701	IWB73263|IWB29747|IWB69854|IWB69853|IWB69852|IWB58259|IWB40861|IWB35421|IWB73250|IWB73251	H693	CACCAGCACT	3.935e-06		6.962e-06
TGW	Hap2B-TGW-2	2B	154250818	154.251	IWB33109|IWB47487|IWB73913|IWB22630	H727	GGGA	8.815e-06
CCI	Hap2B-CCI-1	2B	604997322	604.997	IWB62437|IWB11808|IWB49567	H781	GGT	9.697e-07
CCI	Hap2B-CCI-1	2B	604997322	604.997	IWB62437|IWB11808|IWB49567	H781	AAG	6.065e-06
RWC	Hap2B-RWC-2	2B	643682900	643.683	IWB48486|IWB48481|IWB63172|IWB48482|IWB48483|IWB21477|IWB21476	H787	TACAAAT	7.484e-06
RWC	Hap2B-RWC-2	2B	643682900	643.683	IWB48486|IWB48481|IWB63172|IWB48482|IWB48483|IWB21477|IWB21476	H787	CGTGGGG	7.484e-06	4.935e-06
PH	Hap2B-PH-3	2B	683003143	683.003	IWB32177|IWB32178|IWB1631|IWB7138|IWB6631|IWB34949|IWB37190|IWB1801	H806	TGCTTTAT		4.41e-08
SFW	Hap2B-SFW-1	2B	690028498	690.028	IWB32106|IWB22170|IWB7438	H807	GGG			8.995e-06
SFW	Hap2B-SFW-1	2B	691780816	691.781	IWB35200|IWB36270	H808	TG	7.405e-07			TaGS2-B1
CCI	Hap2D-CCI-1	2D	274994	0.274994	IWB992|IWB66352|IWB66351	H878	ACC	4.246e-07
GY	Hap2D-GY-1	2D	675258	0.675258	IWB28900|IWB35447	H879	TC			9.104e-06
GY	Hap2D-GY-1	2D	675258	0.675258	IWB28900|IWB35447	H879	CT			9.375e-06
PH	Hap2D-PH-1	2D	9826098	9.8261	IWB42391|IWB65788	H884	GG		9.754e-09
PH	Hap2D-PH-2	2D	14259489	14.2595	IWB55049|IWB3853	H891	TA	6.216e-06		5.793e-06	7.88e-39
SDW	Hap2D-SDW-1	2D	64190307	64.1903	IWB25893|IWB74265	H905	AG		7.558e-06	1.188e-07
SFW	Hap2D-SFW-1	2D	571077641	571.078	IWB60670|IWB26189|IWA8205|IWB4650|IWB63111|IWB63109|IWB29432|IWB30715|IWB3126	H928	GCGGCCGTC			1.493e-06	2.19e-21
SFW	Hap2D-SFW-1	2D	571077641	571.078	IWB60670|IWB26189|IWA8205|IWB4650|IWB63111|IWB63109|IWB29432|IWB30715|IWB3126	H928	GCAATTAGT		7.265e-07		2.19e-21
PH	Hap2D-PH-3	2D	572074690	572.075	IWB63236|IWB2983|IWB2986|IWB2987|IWB2988	H929	CTTTC		3.087e-08
PH	Hap2D-PH-3	2D	572074690	572.075	IWB63236|IWB2983|IWB2986|IWB2987|IWB2988	H929	TCGCT		3.087e-08
GY	Hap2D-GY-2	2D	607418780	607.419	IWB50073|IWB43946	H947	CG	4.159e-06
CCI	Hap3A-CCI-1	3A	10300806	10.3008	IWB49843|IWB52610|IWB49840|IWB22164	H982	ATAG	3.99e-06
TGW	Hap3A-TGW-1	3A	61219715	61.2197	IWB7969|IWB36760|IWB31551|IWB29885|IWB35234|IWB7130|IWB6837	H1011	TAAGCGT	5.189e-06
SFW	Hap3A-SFW-1	3A	666229575	666.23	IWB60569|IWB11684	H1073	CG		1.808e-06
SFW	Hap3A-SFW-1	3A	666229575	666.23	IWB60569|IWB11684	H1073	TA		1.876e-06
SFW	Hap3A-SFW-2	3A	744287068	744.287	IWB13780|IWB54944|IWB50017|IWA7157|IWA7158	H1099	CTCAA			9.538e-06
SFW	Hap3B-SFW-1	3B	4142044	4.14204	IWB5790|IWB64176	H1106	TC	5.724e-06
SDW	Hap3B-SDW-1	3B	9166499	9.1665	IWB71460|IWB39567	H1112	AT	6.21e-06			3.22e-63
PH	Hap3B-PH-1	3B	24940169	24.9402	IWB10462|IWB10463|IWB68984	H1122	TAG		8.743e-06
RWC	Hap3B-RWC-1	3B	40184024	40.184	IWB3475|IWB2745|IWB14916|IWB2054|IWB8689|IWB3436|IWB3437|IWB1808	H1126	TGTAGGGC		3.006e-06
SFW	Hap3B-SFW-2	3B	40184024	40.184	IWB3475|IWB2745|IWB14916|IWB2054|IWB8689|IWB3436|IWB3437|IWB1808	H1126	TGTAGGGC	2.728e-06
TGW	Hap3B-TGW-1	3B	55456779	55.4568	IWA748|IWB14564|IWA747	H1130	TAA	1.348e-07
GY	Hap3B-GY-1	3B	65561171	65.5612	IWB27337|IWB57066|IWB57065|IWB24234|IWB48217	H1135	GCTCG	4.632e-06
TGW	Hap3B-TGW-2	3B	116147709	116.148	IWB40699|IWB48790|IWB48693	H1144	TGG	1.732e-06			4.88e-15
TGW	Hap3B-TGW-2	3B	116147709	116.148	IWB40699|IWB48790|IWB48693	H1144	CAA	1.732e-06			4.88e-15
GY	Hap3B-GY-2	3B	133818996	133.819	IWB11650|IWB6289|IWB56689|IWA7860	H1147	CACG	7.111e-06
Sugar	Hap3B-Sugar-1	3B	133818996	133.819	IWB11650|IWB6289|IWB56689|IWA7860	H1147	CAAG	2.589e-08
TGW	Hap3B-TGW-3	3B	368904600	368.905	IWB27477|IWB49639	H1159	TG	9.52e-06
Chl	Hap3B-Chl-1	3B	480341620	480.342	IWA7905|IWB63202	H1165	TT		2.052e-06
TGW	Hap3B-TGW-4	3B	779542662	779.543	IWB14720|IWB55721|IWB48304|IWB8700	H1248	CTAG	1.827e-06
TGW	Hap3D-TGW-1	3D	2603240	2.60324	IWB63011|IWB28211|IWB42836	H1266	TTA	3.066e-06			2.86e-13
SFW	Hap3D-SFW-1	3D	23744800	23.7448	IWB75114|IWB58167	H1278	AT	3.054e-06			3.88e-25
Chl	Hap4A-Chl-1	4A	12399327	12.3993	IWA8389|IWB72445	H1297	CC		7.995e-06
RWC	Hap4A-RWC-1	4A	29069758	29.0698	IWB54290|IWB26155|IWB67355	H1300	TCC	1.293e-08			8.14e-17
RWC	Hap4A-RWC-1	4A	29069758	29.0698	IWB54290|IWB26155|IWB67355	H1300	CTT	5.805e-07			8.14e-17
CTSpike	Hap4A-CTSpike-1	4A	614870817	614.871	IWA7310|IWB5865	H1345	CC		8.913e-06
GS	Hap4A-GS-1	4A	631922510	631.923	IWB29781|IWB43187|IWB2846|IWB23132	H1351	TTAT		9.276e-06
CCI	Hap4A-CCI-1	4A	649471218	649.471	|IWB32544|IWB45457|IWB42022|IWB42023|IWB33076|IWB35551	H1452	TCCCATC	9.315e-06
Chl	Hap4A-Chl-2	4A	726215255	726.215	IWB3570|IWB3569	H1378	GA		1.644e-07
Chl	Hap4A-Chl-2	4A	726215255	726.215	IWB3570|IWB3569	H1378	AG		2.483e-07
PH	Hap4A-PH-1	4A	732511707	732.512	IWB23688|IWB60136|IWB36777|IWB42226|IWB42227	H1382	GACAT		4.217e-07		1.74e-31
GY	Hap4A-GY-1	4A	738781109	738.781	IWB11368|IWB11369	H1390	CT	2.474e-06
GY	Hap4A-GY-1	4A	738781109	738.781	IWB11368|IWB11369	H1390	TC	6.557e-06
TGW	Hap4B-TGW-1	4B	1047091	1.04709	IWB60835|IWB33242	H1396	CC	2.826e-07
Sugar	Hap4B-Sugar-1	4B	535049503	535.05	IWB4300|IWB32990|IWB30335|IWB46476|IWA7168|IWA7167|IWB55457|IWA4070	H1427	TTGCGAAA		4.231e-06
Sugar	Hap4B-Sugar-1	4B	535049503	535.05	IWB4300|IWB32990|IWB30335|IWB46476|IWA7168|IWA7167|IWB55457|IWA4070	H1427	CCAAAGGG		4.231e-06
TGW	Hap4B-TGW-2	4B	621326896	621.327	IWB23339|IWB23338|IWB72772|IWB7278|IWB23337|IWB36159	H1445	TGTTTT	9.838e-06
Chl	Hap4B-Chl-1	4B	651800378	651.8	IWB10236|IWB38327|IWB35505|IWB7266|IWB11859|IWB45261|IWB30656	H1456	TCGGCCC		1.608e-08
Proline	Hap4D-Proline-1	4D	42538561	42.5386	IWB23513|IWB23512	H1468	GT		1.602e-06	4.696e-07
GY	Hap5A-GY-1	5A	2808710	2.80871	IWB65854|IWB42948	H1478	AC	9.65e-08
TGW	Hap5A-TGW-1	5A	2808710	2.80871	IWB65854|IWB42948	H1478	AC	1.745e-07
SDW	Hap5A-SDW-1	5A	488629690	488.63	IWB73348|IWB21444|IWB21443	H1548	CTT			4.78e-07
SFW	Hap5A-SFW-1	5A	488629690	488.63	IWB73348|IWB21444|IWB21443	H1548	CTT			5.173e-06
TGW	Hap5A-TGW-2	5A	504567362	504.567	IWB28390|IWB28391|IWB28392	H1553	GGC	3.477e-08			Vrn-A1
TGW	Hap5A-TGW-2	5A	504567362	504.567	IWB28390|IWB28391|IWB28392	H1553	ATA	3.477e-08			Vrn-A1
GY	Hap5A-GY-2	5A	504762580	504.763	IWB54628|IWB5459|IWB56233|IWB3848	H1554	ATA	1.506e-06		Vrn-A1
GY	Hap5A-GY-2	5A	504762580	504.763	IWB54628|IWB5459|IWB56233|IWB3848	H1554	GCTT	9.755e-08		Vrn-A1
PH	Hap5A-PH-1	5A	679489793	679.49	IWB56756|IWB47623|IWB47624|IWB54919|IWB69108|IWA7491|IWA2839	H1606	GAGAAA		2.153e-06		AWN
GY	Hap5B-GY-1	5B	10888795	10.8888	IWB29181|IWB50354	H1618	CC		5.332e-06
RWC	Hap5B-RWC-1	5B	55492411	55.4924	IWB5977|IWB56578|IWB58508|IWA7300|IWB47775|IWB51376|IWB20311	H1634	GACAGTA	7.428e-06
PH	Hap5B-PH-1	5B	580085162	580.085	IWB29442|IWA7910	H1754	GG		8.424e-06
TGW	Hap5B-TGW-1	5B	587126764	587.127	IWB43739|IWB36364|IWB64098	H1756	CGT	7.979e-06			Vrn-B1
TGW	Hap5B-TGW-2	5B	603881835	603.882	IWB68185|IWB68186|IWB6889|IWB11915|IWB71390|IWB71391|IWB73165|IWB71825|IWB71849	H1765	ATTCTCGTT		4.175e-06
GY	Hap5B-GY-2	5B	671192911	671.193	IWB38821|IWB46778|IWB44440|IWB10948	H1789	GCCT	8.481e-06
CTSpike	Hap5D-CTSpike-1	5D	52615044	52.615	IWB34705|IWB58507|IWB58506|IWB20310	H1817	CTAG	1.906e-11			7.78E-22; CWI-5D
Chl	Hap6A-Chl-1	6A	4427440	4.42744	IWB20143|IWB48751	H1861	CA		5.258e-06
PH	Hap6B-PH-1	6B	15781175	15.7812	IWB54722|IWB54721|IWB72988	H1997	CCG		6.643e-06
PH	Hap6B-PH-2	6B	709531181	709.531	IWB34745|IWB70317|IWB72471	H2120	GTT		8.41e-06
RWC	Hap6D-RWC-1	6D	21981854	21.9819	IWB1864|IWB40703|IWB6044|IWB6401|IWB73285	H2153	GCAAA	9.066e-06
CTSpike	Hap6D-CTSpike-1	6D	115421898	115.422	IWA5586|IWA6514	H2160	GT	8.414e-06
CTSpike	Hap7A-CTSpike-1	7A	210855892	210.856	IWB71716|IWB71714	H2257	CC	1.157e-06
TGW	Hap7A-TGW-1	7A	625743344	625.743	IWB60287|IWB4280|IWA8550	H2288	GCA	2.807e-08
RWC	Hap7A-RWC-1	7A	701493027	701.493	IWB5869|IWB28967|IWA8393|IWB46674|IWB50566|IWB50567|IWB30790	H2309	GACTAAC		8.847e-06
GY	Hap7B-GY-1	7B	3148623	3.14862	IWB50020|IWB49816	H2332	AC		5.739e-06
GY	Hap7B-GY-1	7B	3148623	3.14862	IWB50020|IWB49816	H2332	GC	8.055e-06
TGW	Hap7B-TGW-1	7B	3148623	3.14862	IWB50020|IWB49816	H2332	GC	7.473e-07
GY	Hap7B-GY-2	7B	133494193	133.494	IWB60247|IWB62297|IWB54861	H2356	AAT			6.662e-06	2.21e-24
GY	Hap7B-GY-3	7B	253693437	253.693	IWB51302|IWB61998|IWB45259|IWB23005	H2364	GCCC	1.336e-06
TGW	Hap7B-TGW-2	7B	253693437	253.693	IWB51302|IWB61998|IWB45259|IWB23005	H2364	ATTT	1.26e-06
TGW	Hap7B-TGW-2	7B	253693437	253.693	IWB51302|IWB61998|IWB45259|IWB23005	H2364	GCCC	6.879e-07
GY	Hap7B-GY-4	7B	516470151	516.47	IWB45622|IWB59470|IWB31012|IWB74931|IWB48540	H2376	TGCGT	3.823e-06
GY	Hap7B-GY-4	7B	516470151	516.47	IWB45622|IWB59470|IWB31012|IWB74931|IWB48540	H2376	CATAG	3.823e-06
TGW	Hap7B-TGW-3	7B	564173109	564.173	IWB460|IWA4191|IWB56770	H2384	GCT	2.056e-08
TGW	Hap7B-TGW-3	7B	564173109	564.173	IWB460|IWA4191|IWB56770	H2384	TAC	2.056e-08
PH	Hap7B-PH-1	7B	630107901	630.108	IWB46134|IWB57409	H2398	GC	9.29e-06		2.095e-06	8.81e-22
TGW	Hap7D-TGW-1	7D	540848343	540.848	IWB44978|IWB26969|IWB25969|IWB68837	H2463	ATGA	1.265e-06
TGW	Hap7D-TGW-1	7D	540848343	540.848	IWB44978|IWB26969|IWB25969|IWB68837	H2463	GCAG	1.265e-06

## Sheet: Table S5
Table S5: Selective sweeps identified in synthetic-derived wheat panel using five different statistical approaches and their co-localization with functional genes
SNP	chrom	pos	VCFtools_Fst	eigenGWAS_Fst	eigenGWAS_P	Fexp	T		Gene
IWB72065	1A	33020863	0.608593	1.8637	0	0.854615	13.6575	5.88545e-36
IWB51485	1A	33021144	0.148178	0.0547	0.0184	0.855624	5.80572	1.18675e-08
IWB66891	1A	36565689	0.166119	0.0622	0.0126	0.842308	6.11533	2.04107e-09
IWB72799	1A	36569697	0.185128	0.0719	0.0072	0.824786	6.51423	1.89727e-10
IWB50863	1A	255744805	0.602775	1.9297	0	0.857009	13.5257	2.13731e-35
IWB39795	1A	503313180	0.683567	1.5724	3.38e-168	0.87047	12.7733	3.02629e-32	Glu-A1
IWB14143	1A	569133555	0.248798	0.0938	0.0004	0.772222	7.67599	9.71467e-14
IWB62334	1B	205419440	0.482029	1.2708	2.44e-73	0.887222	11.8057	2.54514e-28
IWB72800	1D	37220898	0.189771	0.0699	0.0084	0.821282	6.59307	1.16978e-10
IWB15107	1D	149829589	0.61198	1.9296	0	0.854915	13.641	6.91496e-36
IWB44226	1D	468473692	0.589466	1.9295	0	0.859103	13.4099	6.60623e-35	Elf3-D1
IWB3679	2A	12912621	0.0927647	0.0409	0.0745	0.904684	4.5876	5.77119e-06
IWB9104	2A	124207500	0.620151	1.8011	0	0.850427	13.8868	6.16067e-37	Sus2-2A
IWB67340	2A	423192077	0.589466	1.9295	0	0.859103	13.4099	6.60623e-35
IWB10949	2A	515945754	0.199725	0.0757	0.0058	0.814274	6.74997	4.408e-11	TaCwi-A1
IWB62891	2A	515956944	0.130175	0.0481	0.0151	0.871043	5.43818	8.7044e-08
IWB8846	2A	517399143	0.130791	0.0476	0.0172	0.871043	5.43818	8.7044e-08
IWB7904	2A	520300715	0.14109	0.0514	0.0115	0.862632	5.64	2.95306e-08
IWB50103	2A	554740674	0.0999608	0.0362	0.0279	0.897675	4.77178	2.44733e-06
IWB36324	2A	607909133	0.106593	0.0386	0.0146	0.892068	4.91615	1.22502e-06
IWB67293	2A	622695354	0.614587	1.8633	0	0.852521	13.7723	1.90417e-36
IWB69795	2A	622737846	0.608593	1.8637	0	0.854615	13.6575	5.88545e-36
IWB74476	2A	694752956	0.617589	1.9283	0	0.848034	14.0172	1.69638e-37
IWB18670	2A	726025752	0.600661	1.9296	0	0.857009	13.5257	2.13731e-35
IWB23494	2A	758554565	0.144942	0.0524	0.0381	0.857726	5.75622	1.56167e-08
IWB69527	2A	776039031	0.615632	1.8634	0	0.852521	13.7723	1.90417e-36
IWB65636	2B	7976083	0.1139	0.042	0.0112	0.88506	5.0933	5.11901e-07
IWB53182	2B	113606564	0.626676	1.9288	0	0.848034	14.0172	1.69638e-37
IWB71922	2B	520206164	0.607554	1.8636	0	0.854615	13.6575	5.88545e-36
IWA528	2B	527108263	0.202933	0.0803	0.0037	0.808667	6.87481	2.0018e-11
IWB5039	2B	563043771	0.611415	1.863	0	0.852521	13.7723	1.90417e-36
IWB47975	2B	616497131	0.607747	1.9294	0	0.854915	13.641	6.91496e-36
IWB22278	2B	651357795	0.5873	1.9294	0	0.859103	13.4099	6.60623e-35
IWB2073	2B	710285738	0.609875	1.9295	0	0.854915	13.641	6.91496e-36	TaGS2-B1
IWB54212	2B	767016323	0.151343	0.0549	0.0024	0.852821	5.87144	8.21801e-09
IWB64462	2B	767021323	0.148842	0.0541	0.0026	0.855624	5.80572	1.18675e-08
IWB8607	2B	767021859	0.152647	0.0555	0.0023	0.85212	5.88783	7.49475e-09
IWB57596	2D	1602888	0.208336	0.0745	0.0126	0.806564	6.92148	1.48592e-11
IWB39555	2D	5329683	0.100731	0.0374	0.0267	0.897675	4.77178	2.44733e-06
IWB37483	2D	5335288	0.598525	1.9295	0	0.857009	13.5257	2.13731e-35
IWB5699	2D	9864356	0.0867032	0.0359	0.0249	0.907487	4.51264	8.11648e-06
IWB45395	2D	93086911	0.595277	1.9293	0	0.857009	13.5257	2.13731e-35
IWB61350	2D	103465468	0.614587	1.8633	0	0.852521	13.7723	1.90417e-36
IWB63892	2D	293684363	0.591609	1.9296	0	0.859103	13.4099	6.60623e-35
IWB45487	2D	538311108	0.588386	1.9295	0	0.859103	13.4099	6.60623e-35
IWB55091	2D	538798242	0.0973708	0.035	0.0162	0.898376	4.75356	2.66749e-06
IWB17689	2D	544877138	0.594781	1.9298	0	0.859103	13.4099	6.60623e-35
IWB16633	2D	554076673	0.594781	1.9298	0	0.859103	13.4099	6.60623e-35
IWB15947	2D	561899200	0.626681	1.9293	0	0.850427	13.8868	6.16067e-37
IWB17964	2D	568249742	0.594781	1.9298	0	0.859103	13.4099	6.60623e-35
IWB18135	2D	573971867	0.594781	1.9298	0	0.859103	13.4099	6.60623e-35
IWB16517	2D	589239803	0.617132	1.9294	0	0.852521	13.7723	1.90417e-36
IWB18731	2D	590370919	0.594781	1.9298	0	0.859103	13.4099	6.60623e-35
IWB27281	2D	593270967	0.594781	1.9298	0	0.859103	13.4099	6.60623e-35
IWB29662	2D	601604090	0.597449	1.9294	0	0.857009	13.5257	2.13731e-35
IWB1769	2D	624558740	0.158774	0.0576	0.0019	0.845812	6.03446	3.25566e-09
IWB41102	3A	20329372	0.121058	0.0431	0.0113	0.879453	5.23265	2.53104e-07
IWB46342	3A	107321364	0.662464	1.7961	0	0.833675	14.7903	7.37953e-41
IWB73868	3A	107418529	0.610346	1.8629	0	0.852521	13.7723	1.90417e-36
IWB26160	3A	208246933	0.600661	1.9296	0	0.857009	13.5257	2.13731e-35
IWB9840	3A	430317695	0.622873	1.9264	0	0.848034	14.0172	1.69638e-37
IWB29557	3A	510829799	0.198327	0.0745	0.001	0.813573	6.76561	3.99551e-11
IWB73166	3A	558891262	0.230572	0.0895	0.0007	0.787641	7.33873	9.66299e-13
IWB70678	3A	562983631	0.239416	0.0903	0.0006	0.781333	7.47693	3.80527e-13
IWB36309	3A	642032564	0.593027	1.8467	0	0.859701	13.3767	9.11972e-35
IWB75052	3A	657923790	0.592672	1.9297	0	0.859103	13.4099	6.60623e-35
IWB43218	3A	722210396	0.252635	0.1021	9.87e-05	0.768017	7.7677	5.13276e-14
IWA7812	3A	722214848	0.213782	0.08	0.0005	0.80306	6.99912	9.02014e-12
IWB40023	3A	728248665	0.356735	0.9215	8.68e-258	0.924017	9.49541	1.1476e-19	Pod-A1
IWB30710	3B	50908015	0.184397	0.0688	0.0024	0.824786	6.51423	1.89727e-10
IWB24234	3B	65562240	0.101711	0.0369	0.0167	0.896274	4.80811	2.05953e-06
IWB50759	3B	289613679	0.622908	1.928	0	0.845641	14.1471	4.67085e-38
IWB38622	3B	410043304	0.594781	1.9298	0	0.859103	13.4099	6.60623e-35
IWB46704	3B	434059098	0.594781	1.9298	0	0.859103	13.4099	6.60623e-35
IWB70852	3B	457024990	0.593083	1.9292	0	0.857009	13.5257	2.13731e-35
IWB41769	3B	761576738	0.535103	1.6051	3.85e-165	0.872564	12.6544	9.3591e-32
IWB3152	3B	785551595	0.589466	1.9295	0	0.859103	13.4099	6.60623e-35
IWB6092	3B	792801438	0.251541	0.1007	0.0003	0.779231	7.52292	2.78249e-13	COMT-3B
IWB65442	3D	251616	0.118925	0.0439	0.0102	0.880855	5.198	3.01997e-07
IWB32704	3D	15925343	0.113451	0.0415	0.0111	0.887162	5.04052	6.65677e-07
IWB65303	3D	48424540	0.0886847	0.0374	0.1196	0.906085	4.55021	6.84512e-06
IWB41716	3D	64480051	0.594781	1.9298	0	0.859103	13.4099	6.60623e-35
IWB17992	3D	137483231	0.604511	1.9293	0	0.854915	13.641	6.91496e-36	CKX-D1
IWB31282	3D	400993321	0.593083	1.9292	0	0.857009	13.5257	2.13731e-35
IWB55287	3D	427453168	0.107166	0.0404	0.1098	0.891368	4.93403	1.12309e-06
IWB27268	3D	437217737	0.593729	1.9297	0	0.859103	13.4099	6.60623e-35
IWB56466	3D	511937417	0.0980597	0.0363	0.1248	0.899077	4.73529	2.90723e-06
IWB15644	3D	524710633	0.0867028	0.0322	0.1054	0.908889	4.47487	9.62114e-06
IWB63677	3D	528608555	0.0895349	0.0328	0.104	0.907487	4.51264	8.11648e-06
IWA4009	4A	370235768	0.594781	1.9298	0	0.859103	13.4099	6.60623e-35
IWB62190	4A	549672010	0.608593	1.8637	0	0.854615	13.6575	5.88545e-36
IWB58552	4A	629917641	0.261111	0.1024	0.0003	0.761709	7.90513	1.9526e-14	CWI-4A
IWB36834	4A	732772185	0.606032	1.9277	0	0.857009	13.5257	2.13731e-35
IWB64613	4B	4912545	0.126707	0.0459	0.0245	0.874547	5.35302	1.36017e-07
IWB68063	4B	33623394	0.592672	1.9297	0	0.859103	13.4099	6.60623e-35
IWB54441	4B	70724876	0.60651	1.8635	0	0.854615	13.6575	5.88545e-36
IWB30518	4B	110242568	0.629972	1.929	0	0.852821	13.756	2.23726e-36
IWB48046	4B	251368638	0.622825	1.8631	0	0.850427	13.8868	6.16067e-37
IWB54786	4B	636778927	0.599596	1.9295	0	0.857009	13.5257	2.13731e-35
IWB66118	4D	2324973	0.622207	1.8014	0	0.850427	13.8868	6.16067e-37
IWA7790	4D	30836787	0.5873	1.9294	0	0.859103	13.4099	6.60623e-35
IWB55823	4D	30836838	0.588386	1.9295	0	0.859103	13.4099	6.60623e-35
IWA3322	4D	32662254	0.621182	1.8013	0	0.850427	13.8868	6.16067e-37
IWA2712	4D	68466382	0.193156	0.0794	0.002	0.817778	6.67165	7.19139e-11
IWB15232	4D	305054695	0.602775	1.9297	0	0.857009	13.5257	2.13731e-35
IWA1802	4D	538784257	0.0900904	0.0347	0.0601	0.905385	4.56893	6.2855e-06
IWB956	5A	2425085	0.100872	0.0403	0.0219	0.896274	4.80811	2.05953e-06
IWB60483	5A	338894594	0.594781	1.9298	0	0.859103	13.4099	6.60623e-35
IWB66432	5A	382327944	0.5873	1.9294	0	0.859103	13.4099	6.60623e-35
IWB5324	5A	547416095	0.617707	1.8636	0	0.852521	13.7723	1.90417e-36	Vrn-A1
IWB57785	5A	614364617	0.610635	1.9291	0	0.852521	13.7723	1.90417e-36
IWB41168	5A	662360404	0.349936	0.854	3.54e-308	0.925214	9.41425	2.20013e-19	AWN
IWA500	5B	28954488	0.594781	1.9298	0	0.859103	13.4099	6.60623e-35
IWB58430	5B	51834381	0.601721	1.9296	0	0.857009	13.5257	2.13731e-35
IWA5236	5B	70813355	0.602775	1.9297	0	0.857009	13.5257	2.13731e-35
IWB62971	5B	132287471	0.693808	1.8613	0	0.87047	12.7733	3.02629e-32
IWA2847	5B	155082451	0.109744	0.0435	0.0461	0.890667	4.95186	1.02955e-06
IWB13099	5B	169679421	0.64701	1.8569	0	0.840855	14.4056	3.54017e-39
IWB61386	5B	173858037	0.614415	1.8559	0	0.855214	13.6246	8.12457e-36
IWB39178	5B	176580625	0.62082	1.8556	0	0.850427	13.8868	6.16067e-37
IWB46029	5B	372106359	0.590235	1.8568	0	0.859103	13.4099	6.60623e-35
IWB24999	5B	398392342	0.594781	1.9298	0	0.859103	13.4099	6.60623e-35
IWB71849	5B	604068254	0.0879479	0.0322	0.0613	0.908889	4.47487	9.62114e-06
IWB61759	5B	606850621	0.0939851	0.0349	0.0549	0.903282	4.62479	4.86429e-06
IWB53459	5B	607475020	0.603823	1.9297	0	0.857009	13.5257	2.13731e-35
IWB25562	5B	608857060	0.0955348	0.0367	0.0537	0.901179	4.68024	3.76185e-06
IWB47965	5B	615703775	0.593729	1.9297	0	0.859103	13.4099	6.60623e-35
IWB56071	5B	623585388	0.599596	1.9295	0	0.857009	13.5257	2.13731e-35
IWB7690	5B	635808783	0.603823	1.9297	0	0.857009	13.5257	2.13731e-35
IWB5353	5B	637123825	0.602775	1.9297	0	0.857009	13.5257	2.13731e-35
IWB74826	5B	639093511	0.613535	1.8632	0	0.852521	13.7723	1.90417e-36
IWB70782	5B	639093596	0.60651	1.8635	0	0.854615	13.6575	5.88545e-36
IWA374	5B	661896651	0.222122	0.0826	0.0008	0.793949	7.20015	2.42785e-12
IWB22975	5B	670829777	0.0968472	0.0352	0.1167	0.900479	4.69863	3.45245e-06
IWB73046	5B	700232306	0.146241	0.0547	0.007	0.856325	5.78924	1.30061e-08
IWB55144	5B	700331149	0.596366	1.9294	0	0.857009	13.5257	2.13731e-35
IWB44640	5D	112046158	0.61198	1.86	0	0.854915	13.641	6.91496e-36
IWB55915	5D	188337743	0.150677	0.0535	0.007	0.852821	5.87144	8.21801e-09
IWB55914	5D	188337772	0.145645	0.0517	0.0083	0.857026	5.77274	1.42525e-08
IWB48213	5D	322382238	0.58653	1.9278	0	0.861197	13.2937	2.04201e-34
IWB15855	5D	526498676	0.090347	0.0331	0.1401	0.906786	4.53145	7.45402e-06
IWB17025	5D	536083358	0.101176	0.0429	0.0982	0.898376	4.75356	2.66749e-06
IWB11346	5D	550442003	0.209069	0.0786	0.0028	0.803761	6.9836	9.96958e-12
IWB9561	5D	557376005	0.169421	0.0696	0.002	0.835299	6.27591	7.95759e-10	CWI-D1
IWB761	6A	689038	0.20275	0.0779	0.0017	0.810769	6.82806	2.69384e-11
IWB72971	6A	4364794	0.592672	1.9297	0	0.859103	13.4099	6.60623e-35
IWB28559	6A	18707008	0.625945	1.8634	0	0.850427	13.8868	6.16067e-37
IWB5918	6A	24067812	0.595666	1.9277	0	0.859103	13.4099	6.60623e-35
IWB32524	6A	32670205	0.675534	1.7983	0	0.833675	14.7903	7.37953e-41
IWB40829	6A	47900288	0.593729	1.9297	0	0.859103	13.4099	6.60623e-35
IWB72970	6A	48558277	0.591976	1.9292	0	0.857009	13.5257	2.13731e-35
IWB59903	6A	70571809	0.0896865	0.0345	0.0624	0.906085	4.55021	6.84512e-06
IWA5399	6A	290444434	0.597798	1.9278	0	0.859103	13.4099	6.60623e-35
IWB72583	6A	573487710	0.594781	1.9298	0	0.859103	13.4099	6.60623e-35
IWB69987	6A	584985905	0.584655	1.9272	0	0.859103	13.4099	6.60623e-35
IWB64715	6A	585108641	0.592672	1.9297	0	0.859103	13.4099	6.60623e-35
IWB42496	6B	166897	0.1823	0.0656	0.0026	0.826889	6.46679	2.53247e-10
IWB7765	6B	167201	0.188873	0.069	0.0021	0.820581	6.60881	1.06157e-10
IWB36065	6B	4875460	0.200042	0.0751	0.0019	0.812171	6.79685	3.28153e-11
IWB61073	6B	41435466	0.594781	1.9298	0	0.859103	13.4099	6.60623e-35
IWB58963	6B	43223467	0.63855	1.9272	0	0.848034	14.0172	1.69638e-37
IWB55812	6B	57287026	0.649054	1.8602	0	0.838462	14.5342	9.74452e-40	1fehw3
IWA5169	6B	504244587	0.121461	0.0545	0.0218	0.87735	5.28441	1.94066e-07
IWB47368	6B	526858442	0.617026	1.8007	0	0.850427	13.8868	6.16067e-37
IWB67466	6B	550078832	0.59054	1.9296	0	0.859103	13.4099	6.60623e-35
IWB47555	6B	551797417	0.621182	1.8013	0	0.850427	13.8868	6.16067e-37
IWB25354	6B	551800161	0.593729	1.9297	0	0.859103	13.4099	6.60623e-35
IWB288	6B	664217447	0.233281	0.0875	0.0006	0.785538	7.38484	7.09122e-13
IWB487	6B	675441747	0.297267	0.1178	9.22e-05	0.735778	8.46957	3.24241e-16
IWB7881	6B	678739580	0.308918	0.1261	8.74e-05	0.72947	8.60704	1.15931e-16
IWB17254	6B	688307001	0.601721	1.9296	0	0.857009	13.5257	2.13731e-35
IWB42493	6D	2071140	0.183131	0.067	0.0028	0.826188	6.48262	2.30032e-10
IWB35542	6D	2102073	0.199995	0.0908	0.0012	0.809368	6.85923	2.21033e-11
IWB65851	6D	3327844	0.218089	0.0825	0.0009	0.797453	7.12296	4.03226e-12
IWB67412	6D	5987214	0.638796	1.856	0	0.86	13.3601	1.07151e-34
IWB60093	6D	7344546	0.0880316	0.0368	0.0252	0.906786	4.53145	7.45402e-06
IWB31872	6D	25662713	0.593729	1.9297	0	0.859103	13.4099	6.60623e-35
IWB37295	6D	36817783	0.599596	1.9295	0	0.857009	13.5257	2.13731e-35
IWB14814	6D	408644950	0.598525	1.9295	0	0.857009	13.5257	2.13731e-35	TaGS1a
IWB33776	6D	426061287	0.59054	1.9296	0	0.859103	13.4099	6.60623e-35
IWB18347	6D	437958872	0.594781	1.9298	0	0.859103	13.4099	6.60623e-35
IWB18528	6D	441748412	0.594781	1.9298	0	0.859103	13.4099	6.60623e-35
IWB15972	6D	447844294	0.592672	1.9297	0	0.859103	13.4099	6.60623e-35
IWB22959	6D	447909371	0.309497	0.1247	4.44e-05	0.723863	8.72939	4.59668e-17
IWB25975	6D	448713238	0.308023	0.1216	8.53e-05	0.725265	8.69879	5.79834e-17
IWB55221	6D	449143826	0.598525	1.9295	0	0.857009	13.5257	2.13731e-35
IWB17174	6D	450895598	0.6203	1.9295	0	0.852521	13.7723	1.90417e-36
IWB19519	6D	451181963	0.617132	1.9294	0	0.852521	13.7723	1.90417e-36
IWB15858	6D	453012545	0.592672	1.9297	0	0.859103	13.4099	6.60623e-35
IWB18606	6D	453811216	0.592672	1.9297	0	0.859103	13.4099	6.60623e-35
IWB12277	6D	466953225	0.643471	1.7017	3.52e-243	0.847735	14.0335	1.44381e-37
IWA3394	6D	638671914	0.605459	1.8634	0	0.854615	13.6575	5.88545e-36
IWB27732	7A	1719664	0.594781	1.9298	0	0.859103	13.4099	6.60623e-35	SST-A2
IWB73395	7A	4469966	0.11528	0.043	0.0179	0.882957	5.14579	3.93339e-07
IWB41357	7A	130226429	0.591609	1.9296	0	0.859103	13.4099	6.60623e-35	Sus1-7A
IWA2851	7A	155081085	0.100928	0.04	0.0514	0.897675	4.77178	2.44733e-06
IWB54622	7A	316021343	0.101711	0.0369	0.0166	0.896274	4.80811	2.05953e-06
IWB35159	7A	538784427	0.0944673	0.0362	0.0484	0.901179	4.68024	3.76185e-06
IWB53887	7A	553993765	0.115409	0.0417	0.0228	0.883658	5.12833	4.29482e-07	TaMoc1
IWA7184	7A	708143182	0.594781	1.9298	0	0.859103	13.4099	6.60623e-35
IWB53301	7A	715129368	0.64701	1.9281	0	0.840855	14.4056	3.54017e-39
IWA4137	7A	715692111	0.625916	1.9275	0	0.843248	14.2766	1.28597e-38
IWB46274	7A	730432878	0.615784	1.9288	0	0.850427	13.8868	6.16067e-37
IWB29740	7A	735408631	0.59054	1.9296	0	0.859103	13.4099	6.60623e-35
IWB50020	7B	3148623	0.0948339	0.0339	0.0246	0.902581	4.64332	4.46526e-06
IWB6836	7B	92718067	0.605739	1.8563	0	0.854915	13.641	6.91496e-36
IWB38649	7B	141072270	0.221327	0.0905	0.0016	0.79465	7.18472	2.68781e-12
IWB68881	7B	163490600	0.615247	1.9282	0	0.852821	13.756	2.23726e-36
IWB50204	7B	221970958	0.0980597	0.035	0.0214	0.899077	4.73529	2.90723e-06
IWB51302	7B	253693437	0.0993031	0.0374	0.0183	0.897675	4.77178	2.44733e-06
IWB26761	7B	254461666	0.103943	0.0393	0.0176	0.894872	4.84428	1.73261e-06
IWB64943	7B	254829397	0.102438	0.0393	0.0175	0.895573	4.82622	1.88909e-06
IWB44208	7B	254837111	0.10339	0.0397	0.0165	0.894872	4.84428	1.73261e-06
IWB29751	7B	255051782	0.0968472	0.0352	0.0206	0.900479	4.69863	3.45245e-06
IWB106	7B	255062602	0.0977022	0.0356	0.0203	0.899778	4.71698	3.16826e-06
IWB29949	7B	255063031	0.102043	0.0385	0.0181	0.896274	4.80811	2.05953e-06
IWB58964	7B	255999940	0.114971	0.0427	0.0114	0.885761	5.07574	5.58792e-07
IWB55902	7B	278930412	0.0977022	0.0356	0.0201	0.899778	4.71698	3.16826e-06
IWB26632	7B	296356470	0.118343	0.0443	0.0171	0.880855	5.198	3.01997e-07
IWB34762	7B	446178343	0.0996705	0.0368	0.0196	0.897675	4.77178	2.44733e-06
IWB21552	7B	446178383	0.100202	0.0378	0.0189	0.897675	4.77178	2.44733e-06
IWB45544	7B	450680091	0.100829	0.0366	0.0177	0.896974	4.78997	2.24516e-06
IWB30869	7B	498523562	0.100202	0.0378	0.018	0.897675	4.77178	2.44733e-06
IWB45622	7B	516470151	0.0998266	0.037	0.0185	0.897675	4.77178	2.44733e-06
IWB59470	7B	516472755	0.101649	0.0378	0.0182	0.896974	4.78997	2.24516e-06
IWB31012	7B	516479211	0.0993031	0.0374	0.019	0.897675	4.77178	2.44733e-06
IWB74931	7B	516479386	0.110505	0.0428	0.0151	0.889265	4.98743	8.64977e-07
IWB63784	7B	516802704	0.0968472	0.0352	0.0206	0.900479	4.69863	3.45245e-06
IWB59338	7B	528752467	0.14903	0.0663	0.0071	0.855624	5.80572	1.18675e-08
IWB73892	7B	528752567	0.125332	0.0497	0.0145	0.874547	5.35302	1.36017e-07
IWB73891	7B	528752694	0.115948	0.0429	0.0196	0.883658	5.12833	4.29482e-07
IWB73890	7B	528752976	0.114916	0.0425	0.0202	0.884359	5.11083	4.68905e-07
IWB61624	7B	528767102	0.115948	0.0429	0.0195	0.883658	5.12833	4.29482e-07
IWB61623	7B	528767347	0.116286	0.0434	0.0175	0.882256	5.16323	3.60206e-07
IWB30564	7B	528767404	0.117307	0.0439	0.0175	0.881556	5.18063	3.29835e-07
IWB73105	7B	528862854	0.116857	0.043	0.0172	0.882256	5.16323	3.60206e-07
IWB40796	7B	530373984	0.114464	0.0416	0.0206	0.88506	5.0933	5.11901e-07
IWB68768	7B	530376041	0.12544	0.0481	0.0151	0.875248	5.33591	1.48676e-07
IWB40799	7B	530376141	0.117426	0.0426	0.018	0.882256	5.16323	3.60206e-07
IWB40798	7B	530376298	0.130362	0.0502	0.0146	0.875248	5.33591	1.48676e-07
IWB71964	7B	531641404	0.123258	0.0457	0.0158	0.878051	5.26719	2.1205e-07
IWB69212	7B	531656334	0.115948	0.0429	0.0196	0.883658	5.12833	4.29482e-07
IWB60181	7B	531656434	0.114344	0.0429	0.0197	0.884359	5.11083	4.68905e-07
IWB74713	7B	539233716	0.107935	0.0398	0.0134	0.890667	4.95186	1.02955e-06
IWB39811	7B	568488316	0.1139	0.042	0.0109	0.88506	5.0933	5.11901e-07
IWB51070	7B	569937690	0.612478	1.8631	0	0.852521	13.7723	1.90417e-36
IWB57792	7B	687324514	0.0964142	0.0371	0.0396	0.900479	4.69863	3.45245e-06
IWB10281	7B	687659834	0.0931493	0.0345	0.0433	0.903983	4.60621	5.29857e-06
IWB10280	7B	687659933	0.0869971	0.0316	0.0546	0.908889	4.47487	9.62114e-06
IWB26572	7D	4199074	0.587602	1.9278	0	0.861197	13.2937	2.04201e-34
IWB45774	7D	6694663	0.350301	0.8573	0	0.92641	9.3326	4.21899e-19	GS-D1
IWA118	7D	53988578	0.108894	0.0388	0.0706	0.889966	4.96967	9.43722e-07
IWA5237	7D	70809597	0.616065	1.9293	0	0.852521	13.7723	1.90417e-36	Vrn-D3
IWB18163	7D	90581814	0.593729	1.9297	0	0.859103	13.4099	6.60623e-35
IWB18158	7D	90850687	0.593729	1.9297	0	0.859103	13.4099	6.60623e-35
IWB17329	7D	92417106	0.593729	1.9297	0	0.859103	13.4099	6.60623e-35
IWB15977	7D	93453586	0.593729	1.9297	0	0.859103	13.4099	6.60623e-35
IWB16896	7D	98996079	0.591609	1.9296	0	0.859103	13.4099	6.60623e-35
IWB15175	7D	101396704	0.592672	1.9297	0	0.859103	13.4099	6.60623e-35
IWB16765	7D	102577815	0.594781	1.9298	0	0.859103	13.4099	6.60623e-35
IWB18807	7D	110582054	0.593729	1.9297	0	0.859103	13.4099	6.60623e-35
IWB17922	7D	112050243	0.601721	1.9296	0	0.857009	13.5257	2.13731e-35
IWB18244	7D	116029512	0.592672	1.9297	0	0.859103	13.4099	6.60623e-35
IWB15138	7D	116063545	0.593729	1.9297	0	0.859103	13.4099	6.60623e-35
IWB15800	7D	117524746	0.60651	1.8635	0	0.854615	13.6575	5.88545e-36
IWB15265	7D	117678407	0.592672	1.9297	0	0.859103	13.4099	6.60623e-35
IWB18975	7D	120527129	0.599596	1.9295	0	0.857009	13.5257	2.13731e-35
IWB19023	7D	124513313	0.593729	1.9297	0	0.859103	13.4099	6.60623e-35
IWB63513	7D	127132787	0.589466	1.9295	0	0.859103	13.4099	6.60623e-35
IWB17722	7D	128128910	0.593729	1.9297	0	0.859103	13.4099	6.60623e-35
IWB17095	7D	131463276	0.593729	1.9297	0	0.859103	13.4099	6.60623e-35
IWA5608	7D	132287321	0.693808	1.8613	0	0.87047	12.7733	3.02629e-32
IWB17059	7D	135358328	0.601721	1.9296	0	0.857009	13.5257	2.13731e-35
IWB19229	7D	136013891	0.605596	1.9293	0	0.854915	13.641	6.91496e-36
IWB19189	7D	136142720	0.593729	1.9297	0	0.859103	13.4099	6.60623e-35
IWB17079	7D	142613452	0.602775	1.9297	0	0.857009	13.5257	2.13731e-35
IWB15856	7D	146863118	0.593729	1.9297	0	0.859103	13.4099	6.60623e-35
IWB18495	7D	151272952	0.588386	1.9295	0	0.859103	13.4099	6.60623e-35
IWB18692	7D	151317293	0.595277	1.9293	0	0.857009	13.5257	2.13731e-35
IWB17384	7D	153782719	0.593729	1.9297	0	0.859103	13.4099	6.60623e-35
IWB66864	7D	228523979	0.594781	1.9298	0	0.859103	13.4099	6.60623e-35
IWB26734	7D	232497316	0.592672	1.9297	0	0.859103	13.4099	6.60623e-35
IWB48336	7D	264361775	0.117347	0.0456	0.0175	0.881556	5.18063	3.29835e-07
IWB26841	7D	299153154	0.0980597	0.0363	0.0199	0.899077	4.73529	2.90723e-06
IWB15271	7D	392892132	0.11319	0.0422	0.0671	0.884359	5.11083	4.68905e-07
IWB67835	7D	488048139	0.0969392	0.0367	0.0218	0.900479	4.69863	3.45245e-06
IWB25969	7D	540849386	0.12155	0.0457	0.0137	0.878752	5.24993	2.3168e-07
IWB22338	7D	541241726	0.145607	0.0539	0.0054	0.857726	5.75622	1.56167e-08
IWB55731	7D	604296281	0.0888758	0.0329	0.0505	0.906786	4.53145	7.45402e-06
IWB53577	7D	634696908	0.598525	1.9295	0	0.857009	13.5257	2.13731e-35
IWB31409	7D	634893077	0.598525	1.9295	0	0.857009	13.5257	2.13731e-35	Psy-D1
